# Supplementary material for: Fluconazole resistance in Candida albicans is induced by Pseudomonas aeruginosa quorum sensing
Source: PubMed Central journal article supplement (PMC7211000; doi:10.1038/s41598-020-64761-3), 2020-05-08
Supplement: 41598_2020_64761_MOESM1_ESM.pdf [file 41598_2020_64761_MOESM1_ESM.pdf]

## Supplementary materials

### **Fluconazole resistance in *Candida albicans* is induced by *Pseudomonas aeruginosa* quorum sensing**

H. M. H. N. Bandara<sup>1\*</sup>, D. L. A. Wood<sup>2</sup>, I. Vanwonterghem<sup>2</sup>, P. Hugenholtz<sup>2</sup>, B.P. K. Cheung<sup>3</sup>, and L. P. Samaranayake<sup>4</sup>

<sup>1</sup> Oral Microbiology, Bristol Dental School, University of Bristol, Lower Maudlin Street, Bristol BS1 2LY, UK

<sup>2</sup> Australian Centre for Ecogenomics, School of Chemistry and Molecular Biosciences, The University of Queensland, St Lucia QLD 4072, Australia

<sup>3</sup> Faculty of Dentistry, The University of Hong Kong, 34 Hospital Rd, Sai Ying Pun, Hong Kong SAR, China

<sup>4</sup> College of Dental Medicine, The University of Sharjah, P.O. Box: 27272, Sharjah, UAE

\*Corresponding author;

Dr H. M. H. N. Bandara

Address: Bristol Dental School, Lower Maudlin Street, Bristol BS1 2LY, United Kingdom

Telephone: +44 117 342 9497

E mail: [nihal.bandara@bristol.ac.uk](mailto:nihal.bandara@bristol.ac.uk)

## Supplementary materials

**Supplementary Figure S1: Minimum inhibitory concentrations (MIC50 and MIC80) of fluconazole against *C. albicans* in the presence of various concentrations of C12AHL (0 – 100 µg mL<sup>-1</sup>).**

**Supplementary Table S2: Minimum inhibitory concentrations (MIC50 and MIC80) of fluconazole, C12AHL or Fluconazole+C12AHL against *C. albicans*.**

**Supplementary Table S3: Gene expression data;** Significantly upregulated/downregulated genes in *C. albicans* treated with fluconazole compared to untreated controls. The genes that are known to be associated with antimicrobial sensitivity/resistance are shaded in light blue (adjusted p-value < 1e<sup>-5</sup>).

**Supplementary Table S4: Gene expression data;** Significantly upregulated/downregulated genes in *C. albicans* treated with C12AHL compared to untreated controls. The genes that are known to be associated with antimicrobial sensitivity/resistance are shaded in light blue (adjusted p-value < 1e<sup>-5</sup>).

**Supplementary Table S5: Gene expression data;** Significantly upregulated/downregulated genes in *C. albicans* treated with C12AHL+fluconazole compared to untreated controls. The genes that are known to be associated with antimicrobial sensitivity/resistance are shaded in light blue (adjusted p-value < 1e<sup>-5</sup>).

**Supplementary Table S6: Gene expression data;** Significantly upregulated/downregulated genes in *C. albicans* treated with C12AHL compared to fluconazole only treated samples. The genes that are known to be associated with antimicrobial sensitivity/resistance are shaded in light blue (adjusted p-value < 1e<sup>-5</sup>).

**Supplementary Table S7: Gene expression data;** Significantly upregulated/downregulated genes in *C. albicans* treated with C12AHL+fluconazole compared to fluconazole treated samples. The genes that are known to be associated with antimicrobial sensitivity/resistance are shaded in light blue (adjusted p-value < 1e<sup>-5</sup>).

**Supplementary Figure S8: Principle component analysis of *C. albicans* gene expression.** The gene expression profiles for the control, C12AHL, C12AHL+fluconazole, and fluconazole only treatments were statistically compared using a principle component analysis to identify variability in gene expression between treatments. Each colour represents a different treatment as indicated in the right-side panel, and each circle represents the gene expression for one of the replicates per treatment.

**Supplementary Figure S9: Comparisons among significantly downregulated genes in *C. albicans* exposed to fluconazole, C12AHL or C12AHL+fluconazole.** Genes that are highlighted in red are known

to be associated with antifungal resistance (adjusted p-value < 1e<sup>-5</sup>). Genes that were significantly downregulated between treatments are shown in Supplementary Tables 2-6.

**Supplementary Figure S10: Comparisons among significantly upregulated genes in *C. albicans* exposed to fluconazole, C12AHL or C12AHL+fluconazole.** Genes that are highlighted in red are known to be associated with antifungal resistance (adjusted p-value < 1e<sup>-5</sup>). Genes that were significantly upregulated between treatments are shown in Supplementary Tables 2-6.

**Supplementary Table S11: Protein expression data;** Under-expressed proteins in C12AHL+fluconazole treated *C. albicans* samples compared to fluconazole only treated samples.

**Supplementary Table S12: Protein expression data:** Over-expressed proteins when treated with C12AHL+fluconazole + *C. albicans* compared to fluconazole only treated samples.

**Supplementary Figure S13: Differential expression of *CDR1*, *CDR2* and *MDR1* to C12AHL, fluconazole or their combination.** Real-time quantitative PCR assay data. Note the significant upregulation of *C. albicans CDR1* and *CDR2* when exposed to C12AHL+fluconazole and *CDR2* when exposed to C12AHL compared to solvent controls (P<0.05).

**Supplementary Figure S14: *C. albicans* ergosterol synthesis pathway.** Significantly upregulated genes when exposed to fluconazole compared to C12AHL+fluconazole treated *C. albicans* appear in bold.

**Supplementary Table S15: *Candida albicans* strains used in this study**

**Supplementary Table S16: The primers used for the Real-time quantitative PCR in this study**

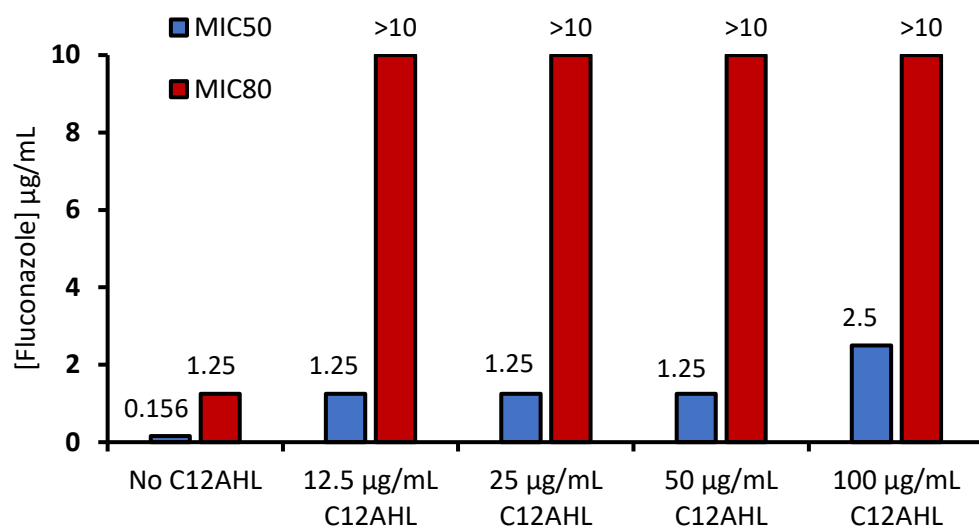

**Supplementary Figure S1:** Minimum inhibitory concentrations (MIC50 and MIC80) of fluconazole against *C. albicans* in the presence of various concentrations of C12AHL (0 – 100 µg mL<sup>-1</sup>).

| Percentage inhibition of <i>C. albicans</i> | Fluconazole only $\mu\text{g/ml}$ ( $\mu\text{M}$ ) | Fluconazole with 100 $\mu\text{g/ml}$ (336 $\mu\text{M}$ ) C12AHL | Fluconazole with 50 $\mu\text{g/ml}$ (168 $\mu\text{M}$ ) C12AHL | Fluconazole with 25 $\mu\text{g/ml}$ (84 $\mu\text{M}$ ) C12AHL | Fluconazole with 12.5 $\mu\text{g/ml}$ (42 $\mu\text{M}$ ) C12AHL |
|---------------------------------------------|-----------------------------------------------------|-------------------------------------------------------------------|------------------------------------------------------------------|-----------------------------------------------------------------|-------------------------------------------------------------------|
| <b>50</b>                                   | 0.156 (0.5 $\mu\text{M}$ )                          | 2.5 (8.2 $\mu\text{M}$ )                                          | 1.25 (4.1 $\mu\text{M}$ )                                        | 1.25 (4.1 $\mu\text{M}$ )                                       | 1.25 (4.1 $\mu\text{M}$ )                                         |
| <b>80</b>                                   | 1.25 (4.1 $\mu\text{M}$ )                           | >10 (>32.6 $\mu\text{M}$ )                                        | >10 (>32.6 $\mu\text{M}$ )                                       | >10 (>32.6 $\mu\text{M}$ )                                      | >10 (>32.6 $\mu\text{M}$ )                                        |

**Supplementary Table S2:** Minimum inhibitory concentrations (MIC50 and MIC80) of fluconazole, C12AHL or Fluconazole+C12AHL against *C. albicans*.

| Name               | Annotation                                                    | log2 Fold Change | Adjusted P value |
|--------------------|---------------------------------------------------------------|------------------|------------------|
| <i>C3_01540W_A</i> | Plasma-membrane-localized protein                             | 5.43             | 8.21E-29         |
| <i>PGA13</i>       | GPI-anchored cell wall protein                                | 4.43             | 3.04E-25         |
| <i>C2_10160W_A</i> | Secreted protein                                              | 4.17             | 4.98E-25         |
| <i>MRV8</i>        | Protein of unknown function                                   | 4.16             | 1.95E-13         |
| <i>PGA23</i>       | Putative GPI-anchored protein of unknown function             | 3.99             | 4.69E-18         |
| <i>PGA45</i>       | Putative GPI-anchored cell wall protein                       | 3.92             | 9.61E-12         |
| <i>C3_06660C_A</i> | Protein of unknown function                                   | 3.77             | 1.96E-08         |
| <i>C7_03310W_A</i> | Protein of unknown function                                   | 3.53             | 6.54E-10         |
| <i>C2_02910W_A</i> | Protein of unknown function                                   | 3.44             | 4.87E-15         |
| <i>MNN4-4</i>      | Mannosyltransferase                                           | 3.37             | 2.70E-18         |
| <i>CSH1</i>        | Aldo-keto reductase                                           | 3.36             | 5.11E-23         |
| <i>C3_03460C_A</i> | Protein of unknown function                                   | 3.35             | 5.16E-23         |
| <i>ERG6</i>        | Delta(24)-sterol C-methyltransferase                          | 3.34             | 8.85E-21         |
| <i>C6_03260W_A</i> | Putative ribonuclease H1                                      | 3.26             | 2.77E-23         |
| <i>DDR48</i>       | Immunogenic stress-associated protein                         | 3.22             | 1.60E-10         |
| <i>IPK2</i>        | Putative inositol polyphosphate multikinase                   | 3.21             | 3.69E-34         |
| <i>RBT4</i>        | Pry family protein                                            | 3.15             | 1.13E-11         |
| <i>RBR1</i>        | Glycosylphosphatidylinositol (GPI)-anchored cell wall protein | 2.97             | 1.62E-08         |
| <i>C1_11260C_A</i> | Putative adhesin-like protein                                 | 2.92             | 3.67E-17         |
| <i>DAG7</i>        | Secretory protein                                             | 2.88             | 6.51E-08         |
| <i>ERG4</i>        | Protein similar to sterol C-24 reductase                      | 2.85             | 1.00E-09         |
| <i>UPC2</i>        | Zn2-Cys6 transcript factor                                    | 2.79             | 1.21E-48         |
| <i>C1_01510W_A</i> | Protein of unknown function                                   | 2.78             | 1.81E-16         |
| <i>CR_00290W_A</i> | Ortholog of <i>S. cerevisiae</i> Rts3                         | 2.72             | 1.55E-30         |
| <i>C1_04590W_A</i> | Protein of unknown function                                   | 2.68             | 1.21E-14         |
| <i>C1_04010C_A</i> | Protein with a NADP-dependent oxidoreductase domain           | 2.67             | 1.06E-19         |
| <i>BMT7</i>        | Beta-mannosyltransferase                                      | 2.62             | 6.52E-10         |
| <i>PGA6</i>        | GPI-anchored cell wall adhesin-like protein                   | 2.56             | 1.03E-07         |
| <i>C2_09810C_A</i> | Protein with predicted peptidase domains                      | 2.54             | 4.41E-09         |
| <i>ERG24</i>       | C-14 sterol reductase                                         | 2.46             | 3.16E-17         |
| <i>LPG20</i>       | Aldo-keto reductase family protein                            | 2.44             | 4.30E-13         |
| <i>ECM331</i>      | GPI-anchored protein                                          | 2.43             | 5.60E-08         |
| <i>C6_00850W_A</i> | Putative glutathione peroxidase                               | 2.42             | 8.67E-10         |
| <i>GRE2</i>        | Putative reductase                                            | 2.40             | 1.85E-09         |
| <i>C2_07220W_A</i> | Putative 20S proteasome assembly protein                      | 2.35             | 1.15E-13         |
| <i>C1_13490C_A</i> | Ortholog(s) have role in cellular calcium ion homeostasis     | 2.35             | 6.45E-24         |
| <i>GAL4</i>        | Zn(II)2Cys6 transcription factor                              | 2.33             | 2.61E-13         |
| <i>GFA1</i>        | Glucosamine-6-phosphate synthase                              | 2.32             | 1.27E-13         |
| <i>C1_11790W_A</i> | Ortholog(s) have thymidylate kinase activity                  | 2.31             | 2.34E-15         |
| <i>C1_09130W_A</i> | Protein of unknown function; Spider biofilm induced           | 2.31             | 1.20E-13         |
| <i>CRH11</i>       | GPI-anchored cell wall transglycosylase                       | 2.30             | 7.62E-08         |
| <i>TPM2</i>        | Putative tropomyosin isoform 2                                | 2.30             | 1.53E-12         |
| <i>TUB1</i>        | Alpha-tubulin                                                 | 2.29             | 1.78E-24         |
| <i>CHO1</i>        | Putative phosphatidylserine synthase                          | 2.29             | 1.89E-10         |
| <i>CR_09040W_A</i> | Protein of unknown function                                   | 2.19             | 5.77E-08         |
| <i>CR_04120C_A</i> | Ortholog(s) have DNA-dependent ATPase activity                | 2.17             | 2.97E-12         |
| <i>C4_00860C_A</i> | Protein of unknown function                                   | 2.15             | 4.41E-09         |

|                    |                                                                          |      |          |
|--------------------|--------------------------------------------------------------------------|------|----------|
| <i>AHP1</i>        | Alkyl hydroperoxide reductase                                            | 2.15 | 8.33E-06 |
| <i>YKE2</i>        | Possible heterohexameric Gim/prefoldin protein complex subunit           | 2.14 | 5.22E-11 |
| <i>ERG1</i>        | Squalene epoxidase                                                       | 2.13 | 1.33E-19 |
| <i>ERG10</i>       | Acetyl-CoA acetyltransferase                                             | 2.11 | 2.55E-08 |
| <i>C3_04740C_A</i> | Ortholog(s) have DNA topoisomerase type I activity                       | 2.11 | 5.34E-10 |
| <i>MLC1</i>        | Microtubule-dependent localized protein                                  | 2.09 | 4.07E-15 |
| <i>WOR4</i>        | Predicted C2H2 zinc finger protein                                       | 2.09 | 7.17E-12 |
| <i>ADH5</i>        | Putative alcohol dehydrogenase                                           | 2.09 | 4.57E-08 |
| <i>ERG3</i>        | C-5 sterol desaturase                                                    | 2.07 | 1.24E-06 |
| <i>LAP41</i>       | Putative aminopeptidase yscl precursor                                   | 2.06 | 9.49E-09 |
| <i>RNR1</i>        | Ribonucleotide reductase large subunit                                   | 2.06 | 3.05E-13 |
| <i>ERG5</i>        | Putative C-22 sterol desaturase                                          | 2.05 | 1.93E-08 |
| <i>ERG26</i>       | C-3 sterol dehydrogenase                                                 | 2.02 | 1.49E-11 |
| <i>INN1</i>        | Protein with similarity to <i>S. cerevisiae</i> Inn1p                    | 2.02 | 2.40E-29 |
| <i>CRL1</i>        | Predicted GTPase of RHO family                                           | 2.00 | 6.85E-21 |
| <i>C5_03490C_A</i> | Stationary phase enriched protein                                        | 1.99 | 1.06E-19 |
| <i>WOR2</i>        | Zn(II)2Cys6 transcription factor                                         | 1.99 | 8.15E-06 |
| <i>C6_04420W_A</i> | Protein of unknown function                                              | 1.97 | 2.54E-06 |
| <i>C5_02850W_A</i> | H/ACA box small nucleolar RNA (snoRNA)                                   | 1.96 | 5.29E-08 |
| <i>NIP100</i>      | p150 subunit of dynactin                                                 | 1.95 | 4.09E-09 |
| <i>C1_09980C_A</i> | Ortholog(s) have acylglycerol lipase activity, serine hydrolase activity | 1.94 | 2.07E-06 |
| <i>CHS2</i>        | Chitin synthase                                                          | 1.93 | 2.44E-25 |
| <i>ERG27</i>       | 3-Keto sterol reductase                                                  | 1.92 | 4.41E-09 |
| <i>FAV2</i>        | Adhesin-like protein                                                     | 1.92 | 3.71E-06 |
| <i>C3_06860C_A</i> | Putative xylose and arabinose reductase                                  | 1.90 | 4.78E-06 |
| <i>CR_09070C_A</i> | Protein of unknown function                                              | 1.90 | 1.33E-10 |
| <i>CR_04870C_A</i> | Trimethylaminobutyraldehyde dehydrogenase                                | 1.89 | 1.27E-06 |
| <i>CR_04770C_A</i> | Protein of unknown function                                              | 1.88 | 2.80E-11 |
| <i>CYB5</i>        | Cytochrome b(5)                                                          | 1.88 | 1.42E-08 |
| <i>RRNL</i>        | Mitochondrial ribosomal RNA of the large ribosomal subunit               | 1.88 | 1.82E-06 |
| <i>C1_11720W_A</i> | Ortholog of <i>Candida albicans</i> WO-1 : CAWG_00265                    | 1.87 | 9.94E-06 |
| <i>NRG1</i>        | Transcription factor/repressor                                           | 1.86 | 1.93E-12 |
| <i>C1_11730W_A</i> | Protein with SEL-1 like protein domain                                   | 1.86 | 5.87E-14 |
| <i>BMT3</i>        | Beta-mannosyltransferase                                                 | 1.85 | 2.55E-13 |
| <i>C1_04470C_A</i> | Protein of unknown function                                              | 1.84 | 5.84E-09 |
| <i>C3_03370C_A</i> | Protein of unknown function                                              | 1.84 | 8.63E-12 |
| <i>SET3</i>        | NAD-dependent histone deacetylase                                        | 1.83 | 5.25E-17 |
| <i>C3_02870C_A</i> | Protein of unknown function                                              | 1.82 | 3.69E-07 |
| <i>PHR2</i>        | Glycosidase                                                              | 1.81 | 4.38E-12 |
| <i>ERG11</i>       | Lanosterol 14-alpha-demethylase                                          | 1.81 | 6.90E-06 |
| <i>REV3</i>        | Ortholog(s) have DNA-directed DNA polymerase activity                    | 1.80 | 1.81E-11 |
| <i>C7_04060W_A</i> | Protein of unknown function                                              | 1.79 | 2.80E-11 |
| <i>C1_04580C_A</i> | Ortholog of Rmd6 involved in <i>S. cerevisiae</i> sporulation            | 1.79 | 9.66E-11 |
| <i>CEK1</i>        | ERK-family protein kinase                                                | 1.77 | 3.10E-10 |
| <i>ECM33</i>       | GPI-anchored cell wall protein                                           | 1.76 | 2.78E-10 |
| <i>IFD6</i>        | Aldo-keto reductase                                                      | 1.75 | 6.62E-08 |
| <i>SVF1</i>        | Putative survival factor; stationary phase enriched protein              | 1.75 | 2.90E-14 |
| <i>BTS1</i>        | Putative geranylgeranyl diphosphate synthase                             | 1.74 | 2.40E-15 |
| <i>SSO2</i>        | Plasma membrane t-SNARE                                                  | 1.73 | 5.11E-23 |

|                    |                                                                                                                       |      |          |
|--------------------|-----------------------------------------------------------------------------------------------------------------------|------|----------|
| <i>DAP1</i>        | Similar to mammalian membrane-associated progesterone receptors                                                       | 1.72 | 1.48E-14 |
| <i>GTT11</i>       | Glutathione S-transferase                                                                                             | 1.72 | 6.33E-12 |
| <i>CR_02880W_A</i> | Protein of unknown function                                                                                           | 1.70 | 1.59E-08 |
| <i>STE13</i>       | Putative pheromone-processing dipeptidyl aminopeptidase                                                               | 1.70 | 1.51E-12 |
| <i>ERG2</i>        | C-8 sterol isomerase                                                                                                  | 1.69 | 1.27E-07 |
| <i>C1_02440C_A</i> | Ortholog(s) have thiol-dependent ubiquitin-specific protease activity                                                 | 1.68 | 1.34E-11 |
| <i>PDI1</i>        | Putative protein disulfide-isomerase                                                                                  | 1.68 | 8.24E-09 |
| <i>CHS8</i>        | Chitin synthase                                                                                                       | 1.66 | 3.45E-09 |
| <i>C1_04230W_A</i> | Ortholog(s) have ubiquitin binding activity                                                                           | 1.65 | 2.57E-14 |
| <i>SLD1</i>        | Sphingolipid delta-8 desaturase                                                                                       | 1.64 | 5.21E-10 |
| <i>YVC1</i>        | Putative vacuolar cation channel shock                                                                                | 1.64 | 6.64E-09 |
| <i>MSC7</i>        | role in reciprocal meiotic recombination                                                                              | 1.63 | 1.10E-28 |
| <i>SRR1</i>        | Two-component system response regulator                                                                               | 1.62 | 1.27E-06 |
| <i>SRB1</i>        | Essential GDP-mannose pyrophosphorylase                                                                               | 1.61 | 3.65E-07 |
| <i>PSD2</i>        | Ortholog(s) have phosphatidylserine decarboxylase activity                                                            | 1.61 | 3.64E-15 |
| <i>C2_08620W_A</i> | Protein of unknown function                                                                                           | 1.57 | 3.03E-08 |
| <i>C1_13500C_A</i> | H/ACA box small nucleolar RNA (snoRNA)                                                                                | 1.56 | 2.09E-06 |
| <i>CR_09330C_A</i> | Protein with a Staphylococcal nuclease domain                                                                         | 1.53 | 1.77E-07 |
| <i>AHR1</i>        | Zn(II)2Cys6 transcription factor                                                                                      | 1.53 | 7.61E-08 |
| <i>CDC12</i>       | Septin                                                                                                                | 1.52 | 1.53E-08 |
| <i>FAS2</i>        | Alpha subunit of fatty-acid synthase                                                                                  | 1.52 | 4.39E-06 |
| <i>C6_04410C_A</i> | Predicted alcohol dehydrogenase                                                                                       | 1.52 | 2.67E-06 |
| <i>CDC3</i>        | Septin                                                                                                                | 1.50 | 1.20E-11 |
| <i>C5_04350C_A</i> | Ortholog(s) have cell division site                                                                                   | 1.50 | 2.35E-11 |
| <i>C4_06990W_A</i> | Possible mannosyltransferase                                                                                          | 1.49 | 2.25E-12 |
| <i>GCY1</i>        | Aldo/keto reductase                                                                                                   | 1.48 | 2.48E-06 |
| <i>C2_09480W_A</i> | Ortholog(s) have DNA-directed DNA polymerase activity                                                                 | 1.47 | 8.79E-10 |
| <i>RAD50</i>       | Putative DNA double-strand break repair factor                                                                        | 1.46 | 3.48E-09 |
| <i>C1_11120C_A</i> | Protein similar to <i>S. cerevisiae</i> Gvp36p                                                                        | 1.43 | 1.20E-13 |
| <i>FBP1</i>        | Fructose-1,6-bisphosphatase                                                                                           | 1.43 | 6.89E-07 |
| <i>PDS5</i>        | Putative protein with a predicted role in establishment and maintenance of sister chromatid condensation and cohesion | 1.42 | 5.46E-07 |
| <i>BFR1</i>        | Protein involved in the maintenance of normal ploidy                                                                  | 1.42 | 1.08E-07 |
| <i>CR_02300C_A</i> | Protein with a Vps9 vacuolar protein sorting protein domain                                                           | 1.41 | 4.76E-12 |
| <i>PMM1</i>        | Phosphomannomutase                                                                                                    | 1.41 | 3.08E-07 |
| <i>MPT5</i>        | Putative RNA-binding protein                                                                                          | 1.38 | 3.14E-12 |
| <i>C5_02520W_A</i> | Protein of unknown function                                                                                           | 1.38 | 1.23E-06 |
| <i>C2_05720C_A</i> | Putative oxysterol binding protein family                                                                             | 1.37 | 2.34E-15 |
| <i>C6_02490C_A</i> | Protein of unknown function                                                                                           | 1.37 | 8.34E-07 |
| <i>SFH5</i>        | Putative phosphatidylinositol transporter                                                                             | 1.36 | 1.93E-07 |
| <i>LEU4</i>        | Putative 2-isopropylmalate synthase                                                                                   | 1.35 | 9.85E-06 |
| <i>C1_11250W_A</i> | Microtubule-binding protein of the cortical microtubule                                                               | 1.35 | 2.37E-08 |
| <i>CDC13</i>       | Essential protein with similarity to <i>S. cerevisiae</i> Cdc13p                                                      | 1.35 | 3.69E-07 |
| <i>MYO1</i>        | Component of actomyosin ring at neck of newly-emerged bud                                                             | 1.34 | 3.05E-13 |
| <i>PRE10</i>       | Alpha7 (C8) subunit of the 20S proteasome                                                                             | 1.34 | 2.15E-11 |
| <i>C4_05810W_A</i> | Ortholog of <i>S. cerevisiae</i> : CAJ1                                                                               | 1.34 | 9.29E-06 |
| <i>C2_01750C_A</i> | Protein with a life-span regulatory factor domain                                                                     | 1.33 | 8.99E-07 |
| <i>KTR4</i>        | Mannosyltransferase                                                                                                   | 1.31 | 1.31E-07 |
| <i>CHS5</i>        | Putative chitin biosynthesis protein                                                                                  | 1.30 | 1.28E-06 |



|                    |                                                                                                                        |      |          |
|--------------------|------------------------------------------------------------------------------------------------------------------------|------|----------|
| <i>RGS2</i>        | Protein of RGS superfamily                                                                                             | 1.29 | 1.10E-07 |
| <i>SCT2</i>        | Putative glycerol-3-phosphate acyltransferase                                                                          | 1.28 | 5.27E-07 |
| <i>VPS1</i>        | Dynamain-family GTPase-related protein                                                                                 | 1.28 | 1.76E-09 |
| <i>CR_08430W_A</i> | Protein similar to <i>S. cerevisiae</i> Vac14p                                                                         | 1.27 | 3.94E-13 |
| <i>GIG1</i>        | Protein induced by N-acetylglucosamine (GlcNAc)                                                                        | 1.27 | 7.65E-07 |
| <i>C7_04210C_A</i> | Protein similar to <i>Aspergillus</i> CYSK O-acetylserine sulfhydrylase                                                | 1.27 | 2.95E-08 |
| <i>C1_07260C_A</i> | Ortholog(s) have DNA replication origin binding, single-stranded DNA binding activity                                  | 1.26 | 1.83E-16 |
| <i>C5_00750C_A</i> | Predicted protein tyrosine phosphatase                                                                                 | 1.26 | 4.25E-10 |
| <i>BCR1</i>        | Transcription factor                                                                                                   | 1.26 | 3.25E-07 |
| <i>RDH54</i>       | Putative DNA-dependent ATPase with a predicted role in DNA recombination and repair                                    | 1.25 | 4.83E-08 |
| <i>IML2</i>        | Protein of unknown function                                                                                            | 1.25 | 4.59E-08 |
| <i>SEN1</i>        | Putative helicase                                                                                                      | 1.25 | 1.62E-08 |
| <i>C6_00890W_A</i> | Ortholog(s) have cytoplasm localization                                                                                | 1.25 | 4.03E-08 |
| <i>C5_01090C_A</i> | Planktonic growth-induced gene                                                                                         | 1.24 | 7.45E-07 |
| <i>USO6</i>        | Putative vesicular transport protein                                                                                   | 1.24 | 2.74E-09 |
| <i>SCL1</i>        | Proteasome subunit YC7alpha                                                                                            | 1.23 | 2.36E-06 |
| <i>C4_06740C_A</i> | Ortholog(s) have protein binding, bridging activity                                                                    | 1.21 | 1.53E-08 |
| <i>NPT1</i>        | Putative nicotinate phosphoribosyltransferase                                                                          | 1.19 | 3.00E-10 |
| <i>C5_02050W_A</i> | Ortholog(s) have role in Golgi to endosome transport,                                                                  | 1.18 | 5.03E-10 |
| <i>RAD7</i>        | Protein similar to <i>S. cerevisiae</i> Rad7p                                                                          | 1.18 | 3.49E-09 |
| <i>C1_01300W_A</i> | Putative thioredoxin                                                                                                   | 1.17 | 2.98E-09 |
| <i>C3_07770C_A</i> | Ortholog(s) have microtubule binding, protein homodimerization activity                                                | 1.17 | 3.48E-08 |
| <i>C4_04750W_A</i> | Ortholog(s) have role in negative regulation of gluconeogenesis                                                        | 1.16 | 1.38E-09 |
| <i>NCP1</i>        | NADPH-cytochrome P450 reductase                                                                                        | 1.15 | 1.09E-07 |
| <i>CCH1</i>        | Voltage-gated Ca <sup>2+</sup> channel of the high affinity calcium uptake system                                      | 1.15 | 1.86E-11 |
| <i>C4_01220C_A</i> | Protein with a glycoside hydrolase domain                                                                              | 1.14 | 1.05E-06 |
| <i>RTA2</i>        | Flippase                                                                                                               | 1.14 | 5.45E-10 |
| <i>C1_10730W_A</i> | Putative protein of unknown function                                                                                   | 1.14 | 5.13E-06 |
| <i>BET2</i>        | Putative Type II geranylgeranyltransferase beta subunit                                                                | 1.13 | 2.11E-07 |
| <i>C2_02020W_A</i> | Ortholog(s) have Lys48-specific deubiquitinase activity                                                                | 1.12 | 1.05E-06 |
| <i>CR_04080C_A</i> | Endoplasmic reticulum (ER) protein-translocation complex subunit                                                       | 1.11 | 7.29E-09 |
| <i>C4_05800C_A</i> | Protein of unknown function                                                                                            | 1.11 | 3.07E-06 |
| <i>C3_03430C_A</i> | Ortholog(s) have role in ATP export                                                                                    | 1.10 | 4.80E-08 |
| <i>C2_00230W_A</i> | Ortholog(s) have arginyltransferase activity                                                                           | 1.09 | 2.34E-06 |
| <i>DYN1</i>        | Dynein heavy chain                                                                                                     | 1.07 | 3.48E-09 |
| <i>CR_05890C_A</i> | Ortholog(s) have acetyltransferase activator activity, histone binding activity and role in double-strand break repair | 1.07 | 5.11E-08 |
| <i>C6_02810C_A</i> | Ortholog of <i>C. dubliniensis</i> CD36: Cd36_63300                                                                    | 1.07 | 9.48E-06 |
| <i>PMC1</i>        | Vacuolar calcium P-type ATPase                                                                                         | 1.06 | 1.76E-09 |
| <i>PRE6</i>        | Putative alpha-4 subunit of the proteasome                                                                             | 1.05 | 1.53E-06 |
| <i>C4_01790W_A</i> | Adapter protein for pexophagy and the cytoplasm-to-vacuole targeting (Cvt) pathway                                     | 1.05 | 1.84E-08 |
| <i>HEM2</i>        | Putative porphobilinogen synthase                                                                                      | 1.04 | 8.71E-07 |
| <i>C1_02770W_A</i> | Protein of unknown function                                                                                            | 1.03 | 6.84E-06 |
| <i>C4_01670C_A</i> | Ortholog(s) have role in TOR signaling                                                                                 | 1.03 | 5.67E-07 |
| <i>ARO80</i>       | Zn(II)2Cys6 transcription factor                                                                                       | 1.02 | 5.14E-09 |
| <i>SSN8</i>        | Ortholog of <i>S. cerevisiae</i> Ssn8; a component of RNA polymerase II holoenzyme                                     | 1.01 | 5.40E-07 |

|                    |                                                                                        |       |          |
|--------------------|----------------------------------------------------------------------------------------|-------|----------|
| <i>RFA1</i>        | Putative DNA replication factor A                                                      | 0.99  | 4.01E-07 |
| <i>VPS36</i>       | ESCRT II protein sorting complex subunit                                               | 0.97  | 2.85E-06 |
| <i>MKC1</i>        | MAP kinase                                                                             | 0.97  | 6.90E-06 |
| <i>PSD1</i>        | Phosphatidylserine decarboxylase                                                       | 0.97  | 8.67E-08 |
| <i>C2_07010W_A</i> | Predicted ER protein involved in ER-nucleus signaling                                  | 0.94  | 2.67E-06 |
| <i>UBP6</i>        | Putative ubiquitin-specific protease of the 26S proteasome                             | 0.93  | 9.04E-06 |
| <i>C3_07230W_A</i> | Aminophospholipid translocase (flippase)                                               | 0.92  | 2.56E-09 |
| <i>COQ6</i>        | Ortholog(s) have oxidoreductase activity                                               | 0.92  | 1.46E-06 |
| <i>AKL1</i>        | Putative serine/threonine protein kinase                                               | 0.91  | 1.86E-07 |
| <i>C4_06020C_A</i> | Ortholog(s) have DNA-directed DNA polymerase activity                                  | 0.90  | 1.33E-06 |
| <i>C4_04090C_A</i> | Calnexin                                                                               | 0.88  | 1.49E-06 |
| <i>C3_06710W_A</i> | Protein of unknown function                                                            | 0.88  | 9.45E-07 |
| <i>C1_03330C_A</i> | Ortholog(s) have phosphatidylinositol-3,5-bisphosphate binding activity a              | 0.88  | 1.81E-08 |
| <i>APN1</i>        | Ortholog of <i>S. cerevisiae</i> Apn1; an AP endonuclease                              | 0.86  | 6.60E-10 |
| <i>CR_10230W_A</i> | Ortholog(s) have histone acetyltransferase activity                                    | 0.85  | 3.82E-06 |
| <i>ZNC1</i>        | Zn(2)-Cys(6) transcription factor                                                      | 0.81  | 3.14E-06 |
| <i>C2_00570W_A</i> | Ortholog(s) have DNA translocase activit                                               | -0.45 | 9.04E-06 |
| <i>IML1</i>        | Putative protein with a role in autophagy                                              | -0.81 | 1.09E-06 |
| <i>C1_11300C_A</i> | Ortholog(s) have RNA binding                                                           | -0.84 | 4.13E-09 |
| <i>ZCF10</i>       | Putative transcription factor with zinc cluster DNA-binding motif                      | -0.86 | 5.25E-07 |
| <i>C3_03820C_A</i> | Ortholog(s) have role in protein insertion into mitochondrial membrane from inner side | -0.86 | 1.38E-09 |
| <i>C6_01000C_A</i> | Ortholog(s) have translation regulator activity                                        | -0.87 | 1.86E-07 |
| <i>C4_04130W_A</i> | Ortholog(s) have role in mitochondrial respiratory chain complex IV assembly           | -0.89 | 8.48E-06 |
| <i>C4_03780C_A</i> | Putative mitochondrial membrane protein                                                | -0.90 | 1.12E-06 |
| <i>C1_13010W_A</i> | Ortholog(s) have mRNA binding, translation regulator activity                          | -0.90 | 4.42E-06 |
| <i>C6_03530C_A</i> | Predicted ORF from Assembly 19                                                         | -0.91 | 2.49E-06 |
| <i>C1_14200W_A</i> | Possible Golgi membrane protein                                                        | -0.97 | 7.96E-06 |
| <i>CR_03120W_A</i> | Mitochondrial intermembrane space protein of unknown function                          | -1.02 | 5.08E-06 |
| <i>TSC2</i>        | Putative GTPase-activating protein                                                     | -1.02 | 9.65E-08 |
| <i>C5_00820W_A</i> | Ortholog(s) have structural constituent of ribosome activity                           | -1.04 | 2.03E-06 |
| <i>AVT1</i>        | Putative vacuolar transporter                                                          | -1.05 | 1.35E-06 |
| <i>C1_05210C_A</i> | Protein of unknown function                                                            | -1.08 | 2.60E-06 |
| <i>C6_00390W_A</i> | Ortholog(s) have serine-tRNA ligase activity                                           | -1.08 | 6.54E-10 |
| <i>ARF1</i>        | ADP-ribosylation factor                                                                | -1.08 | 1.47E-08 |
| <i>C4_00820W_A</i> | Ortholog(s) have magnesium ion transmembrane transporter activity                      | -1.09 | 9.29E-06 |
| <i>HIP1</i>        | Amino acid permeases                                                                   | -1.10 | 1.42E-07 |
| <i>MRPS9</i>       | Mitochondrial ribosomal protein S9                                                     | -1.11 | 9.71E-06 |
| <i>C2_03560C_A</i> | Ortholog(s) have structural constituent of ribosome activity                           | -1.11 | 3.29E-06 |
| <i>CR_01370C_A</i> | Ortholog(s) have structural constituent of ribosome activity                           | -1.13 | 1.25E-06 |
| <i>C2_07190C_A</i> | Putative mitochondrial ribosomal protein                                               | -1.14 | 2.29E-07 |
| <i>MIF2</i>        | Centromere-associated protein                                                          | -1.14 | 4.89E-12 |
| <i>IFM1</i>        | Putative mitochondrial translation initiation factor                                   | -1.14 | 2.19E-07 |
| <i>C7_01610W_A</i> | Ortholog(s) have role in mitochondrial respiratory chain complex IV assembly           | -1.15 | 2.64E-06 |
| <i>CR_07760W_A</i> | Ortholog(s) have structural constituent of ribosome activity                           | -1.17 | 3.73E-08 |
| <i>C6_03730C_A</i> | Ortholog(s) have structural constituent of ribosome activity                           | -1.18 | 1.23E-06 |
| <i>C7_01720W_A</i> | Flavin-linked sulfhydryl oxidase                                                       | -1.19 | 1.82E-12 |
| <i>C5_03980W_A</i> | Protein of unknown function                                                            | -1.21 | 6.26E-07 |

|                      |                                                                            |       |          |
|----------------------|----------------------------------------------------------------------------|-------|----------|
| <i>C5_04530W_A</i>   | Putative mitochondrial ribosomal protein of the small subunit              | -1.21 | 2.33E-06 |
| <i>RIM9</i>          | Protein required for alkaline pH response via the Rim101 signaling pathway | -1.21 | 5.14E-07 |
| <i>TIM23</i>         | Protein involved in mitochondrial matrix protein import                    | -1.22 | 3.85E-08 |
| <i>CR_01100C_A</i>   | Ortholog(s) have role in mitochondrial respiratory chain complex assembly  | -1.22 | 1.17E-07 |
| <i>CWC22</i>         | Predicted spliceosome-associated protein                                   | -1.23 | 1.85E-08 |
| <i>RSN1</i>          | Protein of unknown function                                                | -1.23 | 8.26E-08 |
| <i>CR_03110W_A</i>   | Ortholog(s) have role in mitochondrial translation                         | -1.24 | 2.89E-09 |
| <i>C4_04820C_A</i>   | Ortholog(s) have structural constituent of ribosome activity               | -1.26 | 2.47E-06 |
| <i>C1_14330W_A</i>   | Ortholog(s) have tRNA-5-taurinomethyluridine 2-sulfurtransferase activity  | -1.28 | 2.37E-07 |
| <i>C6_03200W_A</i>   | Ortholog of <i>C. dubliniensis</i> CD36 : Cd36_63860                       | -1.28 | 1.21E-06 |
| <i>ALS9</i>          | ALS family cell-surface glycoprotein                                       | -1.29 | 1.60E-09 |
| <i>CDR11</i>         | Putative transporter of PDR subfamily of ABC family                        | -1.30 | 8.34E-07 |
| <i>MRPL3</i>         | Ribosomal protein of the large subunit                                     | -1.32 | 2.87E-06 |
| <i>SSC1</i>          | Heat shock protein                                                         | -1.35 | 8.52E-08 |
| <i>C6_03440W_A</i>   | Ortholog(s) have rRNA binding activity                                     | -1.38 | 2.54E-07 |
| <i>C1_14190C_A</i>   | Protein phosphatase inhibitor                                              | -1.38 | 3.80E-06 |
| <i>MGE1</i>          | Putative mitochondrial matrix cochaperone;                                 | -1.39 | 4.76E-06 |
| <i>C1_01150C_A</i>   | Ortholog(s) have tRNA methyltransferase activity                           | -1.39 | 1.79E-06 |
| <i>SSY1</i>          | Amino acid sensor                                                          | -1.40 | 7.56E-06 |
| <i>GAP1</i>          | Amino acid permease                                                        | -1.41 | 1.47E-08 |
| <i>C3_01850W_A</i>   | Ortholog(s) have structural constituent of ribosome activity               | -1.43 | 5.98E-07 |
| <i>CDR4</i>          | Putative ABC transporter superfamily                                       | -1.43 | 2.18E-08 |
| <i>C4_00810C_A</i>   | Ortholog(s) have serine-type endopeptidase activity                        | -1.46 | 2.77E-06 |
| <i>C7_01590C_A</i>   | Ortholog of <i>C. dubliniensis</i> CD36 : Cd36_71420                       | -1.46 | 6.19E-10 |
| <i>C1_08520C_A</i>   | Ortholog(s) have structural constituent of ribosome activity               | -1.46 | 2.05E-09 |
| <i>C1_13060C_A</i>   | Ortholog(s) have role in mitochondrial translation                         | -1.48 | 3.00E-06 |
| <i>C5_02740W_A</i>   | Ortholog(s) have oxidoreductase activity                                   | -1.48 | 2.39E-12 |
| <i>C1_06350W_A</i>   | Protein of unknown function                                                | -1.48 | 2.56E-09 |
| <i>C4_03410W_A</i>   | Ortholog(s) have structural constituent of ribosome activity               | -1.49 | 1.08E-12 |
| <i>ZCF29</i>         | Zn(II)2Cys6 transcription factor                                           | -1.49 | 4.80E-11 |
| <i>CAL0000190891</i> | Predicted MFS family membrane transporter                                  | -1.49 | 9.80E-06 |
| <i>CHA1</i>          | Similar to catabolic ser/thr dehydratases                                  | -1.49 | 2.66E-06 |
| <i>MRPL10</i>        | Putative mitochondrial large subunit ribosomal protein                     | -1.49 | 1.86E-08 |
| <i>MNN22</i>         | Alpha-1,2-mannosyltransferase                                              | -1.57 | 4.60E-11 |
| <i>C6_03540W_A</i>   | Ortholog(s) have structural constituent of ribosome activity               | -1.58 | 5.35E-14 |
| <i>C2_04790C_A</i>   | Predicted membrane transporter                                             | -1.59 | 2.45E-07 |
| <i>C2_00480C_A</i>   | Ortholog(s) have structural constituent of ribosome activity               | -1.61 | 8.76E-10 |
| <i>PHHB</i>          | Putative 4a-hydroxytetrahydrobiopterin dehydratase                         | -1.62 | 5.69E-07 |
| <i>TUF1</i>          | Translation elongation factor TU                                           | -1.63 | 3.73E-08 |
| <i>PLB3</i>          | GPI-anchored cell surface phospholipase B                                  | -1.64 | 6.05E-06 |
| <i>RIM101</i>        | Transcription factor                                                       | -1.64 | 4.41E-09 |
| <i>C2_02180W_A</i>   | Ortholog of <i>S. cerevisiae</i> Zrt3, vacuolar membrane zinc transporter  | -1.65 | 5.08E-15 |
| <i>MSW1</i>          | Protein similar to mitochondrial tryptophanyl-tRNA synthetase              | -1.68 | 1.14E-16 |
| <i>C7_01510W_A</i>   | Predicted membrane transporter                                             | -1.71 | 4.81E-07 |
| <i>C4_07140W_A</i>   | Predicted mitochondrial intermembrane space protein                        | -1.73 | 4.39E-07 |
| <i>GIT3</i>          | Glycerophosphocholine permease                                             | -1.74 | 2.97E-07 |
| <i>IFR2</i>          | Zinc-binding dehydrogenase                                                 | -1.79 | 2.02E-08 |

|                    |                                                                                              |       |          |
|--------------------|----------------------------------------------------------------------------------------------|-------|----------|
| <i>C1_06840C_A</i> | Ortholog(s) have role in mitochondrial respiratory chain complex IV assembly                 | -1.82 | 7.14E-07 |
| <i>ENA2</i>        | Putative sodium transporter                                                                  | -1.82 | 5.21E-10 |
| <i>CTR1</i>        | Copper transporter                                                                           | -1.84 | 3.47E-07 |
| <i>SKN1</i>        | Protein with a role in beta-1,6-glucan synthesis;                                            | -1.91 | 2.04E-06 |
| <i>CAN3</i>        | Predicted amino acid transmembrane transporter                                               | -1.91 | 5.76E-11 |
| <i>C3_00840C_A</i> | Protein of unknown function                                                                  | -1.95 | 3.44E-08 |
| <i>RME1</i>        | Zinc finger protein                                                                          | -1.95 | 4.98E-07 |
| <i>FCY21</i>       | High affinity, high capacity, hypoxanthine-adenine-guanine-cytosine/H <sup>+</sup> symporter | -1.98 | 2.47E-06 |
| <i>C3_01260C_A</i> | Putative adhesin-like protein                                                                | -1.99 | 3.88E-09 |
| <i>ENA21</i>       | Predicted P-type ATPase sodium pump                                                          | -2.00 | 1.19E-09 |
| <i>ALP1</i>        | Cystine transporter                                                                          | -2.13 | 3.95E-07 |
| <i>COX15</i>       | Cytochrome oxidase assembly protein                                                          | -2.15 | 7.72E-11 |
| <i>ATX1</i>        | Putative cytosolic copper metallochaperone                                                   | -2.22 | 8.01E-10 |
| <i>C1_08350C_A</i> | Ortholog of <i>C. dubliniensis</i> CD36: Cd36_02630                                          | -2.28 | 7.27E-13 |
| <i>CR_08880C_A</i> | Protein of unknown function                                                                  | -2.59 | 1.83E-16 |
| <i>AOX2</i>        | Alternative oxidase                                                                          | -2.70 | 2.10E-07 |
| <i>CRP1</i>        | Copper transporter                                                                           | -2.73 | 4.16E-13 |
| <i>SIT1</i>        | Transporter of ferrichrome siderophores, not ferrioxamine B                                  | -2.83 | 1.53E-09 |
| <i>C7_03560W_A</i> | Protein of unknown function                                                                  | -2.98 | 1.34E-27 |
| <i>TPO3</i>        | Putative polyamine transporter; MFS-MDR family                                               | -2.99 | 9.59E-16 |
| <i>DLD1</i>        | Putative D-lactate dehydrogenase                                                             | -3.00 | 7.03E-16 |
| <i>CTN1</i>        | Carnitine acetyl transferase                                                                 | -3.00 | 1.57E-11 |
| <i>FMP45</i>       | Predicted membrane protein induced during mating                                             | -3.01 | 9.17E-10 |
| <i>C1_07160C_A</i> | Protein conserved among the CTG-clade                                                        | -3.19 | 3.11E-12 |
| <i>tR(UCU)4</i>    | tRNA-Arg, predicted by tRNAscan-SE; UCU anticodon                                            | -3.25 | 7.34E-09 |
| <i>GIT2</i>        | Putative glycerophosphoinositol permease                                                     | -3.34 | 1.89E-24 |
| <i>HSP30</i>       | Putative heat shock protein                                                                  | -3.36 | 2.98E-11 |
| <i>C1_11320C_A</i> | Protein of unknown function                                                                  | -3.48 | 4.80E-18 |
| <i>PHO89</i>       | Putative phosphate permease                                                                  | -3.59 | 1.28E-07 |
| <i>ZRT2</i>        | Zinc transporter                                                                             | -3.78 | 1.92E-23 |
| <i>C5_04980W_A</i> | Putative adhesin-like protein                                                                | -4.13 | 1.60E-24 |
| <i>PHO84</i>       | High-affinity phosphate transporter                                                          | -4.29 | 1.81E-17 |
| <i>HNM3</i>        | Putative transporter                                                                         | -4.30 | 3.60E-20 |
| <i>PRA1</i>        | Cell surface protein that sequesters zinc from host tissue                                   | -4.40 | 1.51E-12 |
| <i>JEN2</i>        | Dicarboxylic acid transporter                                                                | -5.34 | 3.80E-47 |

**Supplementary Table S3: Gene expression data;** Significantly upregulated/downregulated genes in *C. albicans* treated with fluconazole compared to untreated controls. The genes that are known to be associated with antimicrobial sensitivity/resistance are shaded in light blue (adjusted *p-value* < 1e<sup>-5</sup>).

| Name               | Annotation                                                                                             | log2 Fold Change | Adjusted P value |
|--------------------|--------------------------------------------------------------------------------------------------------|------------------|------------------|
| <i>ADH3</i>        | Putative NAD-dependent (R,R)-butanediol dehydrogenase                                                  | 3.25             | 2.36E-08         |
| <i>C3_03460C_A</i> | Protein of unknown function                                                                            | 3.19             | 4.58E-20         |
| <i>IFD6</i>        | Aldo-keto reductase                                                                                    | 3.02             | 1.11E-21         |
| <i>ATX1</i>        | Putative cytosolic copper metallochaperone                                                             | 2.75             | 2.42E-14         |
| <i>GRP2</i>        | Methylglyoxal reductase                                                                                | 2.62             | 8.07E-08         |
| <i>C3_05450C_A</i> | Protein of unknown function                                                                            | 2.53             | 2.17E-11         |
| <i>CRZ2</i>        | C2H2 transcription factor                                                                              | 2.51             | 2.86E-17         |
| <i>HSP104</i>      | Heat-shock protein                                                                                     | 2.47             | 3.99E-08         |
| <i>C1_01510W_A</i> | Protein of unknown function                                                                            | 2.46             | 2.65E-12         |
| <i>WOR4</i>        | Predicted C2H2 zinc finger protein                                                                     | 2.40             | 1.18E-14         |
| <i>UGT51C1</i>     | UDP-glucose:sterol glucosyltransferase                                                                 | 2.38             | 1.45E-22         |
| <i>CR_09100C_A</i> | Aldo-keto reductase                                                                                    | 2.35             | 1.36E-09         |
| <i>C7_04090C_A</i> | Predicted mitochondrial cardiolipin-specific phospholipase                                             | 2.35             | 1.59E-10         |
| <i>SRR1</i>        | Two-component system response regulator                                                                | 2.24             | 1.98E-11         |
| <i>HSP78</i>       | Heat-shock protein                                                                                     | 2.22             | 1.27E-08         |
| <i>AAF1</i>        | Possible regulatory protein                                                                            | 2.18             | 2.21E-08         |
| <i>NRG1</i>        | Transcription factor/repressor                                                                         | 2.18             | 4.02E-16         |
| <i>RME1</i>        | Zinc finger protein                                                                                    | 2.17             | 3.28E-08         |
| <i>OPT3</i>        | Oligopeptide transporter                                                                               | 2.15             | 1.60E-10         |
| <i>C5_04030W_A</i> | Protein of unknown function                                                                            | 2.08             | 3.99E-08         |
| <i>GAL102</i>      | UDP-glucose 4,6-dehydratase                                                                            | 2.05             | 3.84E-08         |
| <i>ERO1</i>        | Ortholog of <i>S. cerevisiae</i> Ero1                                                                  | 2.00             | 1.82E-08         |
| <i>YIM1</i>        | Protein similar to protease of mitochondrial inner membrane;                                           | 2.00             | 2.04E-08         |
| <i>GOR1</i>        | Ortholog(s) have glyoxylate reductase activity                                                         | 2.00             | 2.37E-07         |
| <i>CR_06140W_A</i> | Protein of unknown function                                                                            | 1.98             | 1.08E-08         |
| <i>EFG1</i>        | bHLH transcription factor                                                                              | 1.97             | 9.31E-10         |
| <i>C1_03990W_A</i> | Ortholog(s) have proteasome binding activity                                                           | 1.95             | 2.07E-08         |
| <i>SIS1</i>        | Putative Type II HSP40 co-chaperone                                                                    | 1.94             | 5.25E-06         |
| <i>RFG1</i>        | HMG domain transcriptional repressor of filamentous growth and hyphal genes                            | 1.94             | 3.12E-11         |
| <i>INO2</i>        | Transcriptional activator                                                                              | 1.92             | 1.24E-08         |
| <i>C3_00360W_A</i> | Protein of unknown function                                                                            | 1.88             | 2.21E-10         |
| <i>CSH1</i>        | Aldo-keto reductase                                                                                    | 1.87             | 5.61E-07         |
| <i>HSP90</i>       | Essential chaperone                                                                                    | 1.85             | 2.86E-07         |
| <i>C7_00770W_A</i> | Protein of unknown function                                                                            | 1.81             | 6.81E-06         |
| <i>STI1</i>        | Protein that interacts with Cdc37 and Crk1 in two-hybrid; may be involved in Cdc37 chaperone activity; | 1.74             | 7.75E-06         |
| <i>CDR4</i>        | Putative ABC transporter superfamily                                                                   | 1.70             | 6.09E-11         |
| <i>MOH1</i>        | Ortholog of <i>S. cerevisiae</i> Moh1, essential for stationary phase growth                           | 1.68             | 2.64E-10         |
| <i>C1_04010C_A</i> | Protein with a NADP-dependent oxidoreductase domain                                                    | 1.68             | 1.47E-07         |
| <i>C6_00290W_A</i> | Protein of unknown function                                                                            | 1.67             | 2.04E-08         |
| <i>ADA2</i>        | Zinc finger and homeodomain transcriptional coactivator                                                | 1.67             | 2.43E-13         |
| <i>CUP9</i>        | Transcription factor                                                                                   | 1.66             | 7.42E-07         |
| <i>LPG20</i>       | Aldo-keto reductase family protein                                                                     | 1.65             | 8.38E-06         |
| <i>ALK2</i>        | N-Alkane inducible cytochrome P450                                                                     | 1.63             | 1.09E-09         |
| <i>C6_00920W_A</i> | Putative mitochondrial intermembrane space protein                                                     | 1.61             | 4.02E-08         |



|             |                                                                       |       |          |
|-------------|-----------------------------------------------------------------------|-------|----------|
| ZCF1        | Zn(II)2Cys6 transcription factor                                      | 1.59  | 2.33E-12 |
| C2_02920W_A | Putative adhesin-like protein                                         | 1.58  | 6.18E-07 |
| PGA52       | GPI-anchored cell surface protein of unknown function                 | 1.57  | 3.79E-06 |
| SNQ2        | Protein similar to <i>S. cerevisiae</i> Snq2p transporter             | 1.55  | 6.73E-07 |
| ISA1        | Putative mitochondrial iron-sulfur protein                            | 1.55  | 1.62E-08 |
| C4_02740W_A | Protein of unknown function                                           | 1.54  | 2.80E-06 |
| C2_01750C_A | Protein with a life-span regulatory factor domain                     | 1.51  | 4.57E-08 |
| AXL1        | Putative endoprotease                                                 | 1.50  | 8.38E-06 |
| C1_09210C_A | Putative transporter                                                  | 1.47  | 8.96E-08 |
| C2_03690C_A | Protein of unknown function                                           | 1.43  | 6.88E-10 |
| C2_09880C_A | Putative protein of unknown function                                  | 1.42  | 7.26E-06 |
| C3_02630C_A | Protein of unknown function                                           | 1.42  | 1.29E-08 |
| YOR1        | Protein similar to <i>S. cerevisiae</i> Yor1                          | 1.41  | 2.33E-12 |
| HAL9        | Putative Zn(II)2Cys6 transcription factor                             | 1.40  | 5.22E-08 |
| RPN4        | C2H2 transcription factor                                             | 1.40  | 3.13E-09 |
| ZCF39       | Zn(II)2Cys6 transcription factor                                      | 1.39  | 1.55E-06 |
| RGS2        | Protein of RGS superfamily                                            | 1.39  | 3.28E-08 |
| CR_10230W_A | Ortholog(s) have histone acetyltransferase activity                   | 1.36  | 2.94E-14 |
| CR_06960W_A | Ortholog(s) have ATP binding, DNA replication origin binding activity | 1.35  | 1.73E-06 |
| C6_00110C_A | Ortholog of <i>C. dubliniensis</i> CD36 : Cd36_60130                  | 1.29  | 1.88E-07 |
| CR_00040C_A | Putative adhesin-like protein                                         | 1.28  | 1.01E-06 |
| CR_07480W_A | A predicted auxin family transmembrane transporter                    | 1.22  | 2.41E-08 |
| BCR1        | Transcription factor                                                  | 1.21  | 3.28E-06 |
| C4_03020W_A | Putative mitochondrial GTPase                                         | 1.18  | 4.87E-09 |
| CR_05860W_A | Protein of unknown function                                           | 1.16  | 4.22E-06 |
| ALS7        | ALS family protein                                                    | 1.12  | 1.07E-08 |
| C1_01130W_A | Putative ubiquitin ligase complex component                           | 1.09  | 2.80E-06 |
| MHP1        | Protein similar to <i>S. cerevisiae</i> Mhp1p                         | 1.09  | 4.69E-06 |
| ARD         | D-arabitol dehydrogenase                                              | 1.09  | 6.87E-06 |
| C3_04330C_A | Protein of unknown function                                           | 1.07  | 8.47E-06 |
| TEL1        | Ortholog(s) have protein serine/threonine kinase activity             | -0.85 | 1.49E-07 |
| FBA1        | Fructose-bisphosphate aldolase                                        | -1.64 | 8.92E-08 |
| PHHB        | Putative 4a-hydroxytetrahydrobiopterin dehydratase                    | -1.72 | 2.87E-07 |
| IFR2        | Zinc-binding dehydrogenase                                            | -1.78 | 8.07E-08 |
| MNN12       | Predicted alpha-1,3-mannosyltransferase activity                      | -1.93 | 1.55E-06 |
| CRH11       | GPI-anchored cell wall transglycosylase                               | -2.36 | 1.36E-07 |
| SOD5        | Cu-containing superoxide dismutase                                    | -3.26 | 4.51E-08 |
| C6_02100W_A | Secreted protein                                                      | -3.54 | 9.31E-10 |

**Supplementary Table S4: Gene expression data;** Significantly upregulated/downregulated genes in *C. albicans* treated with C12AHL compared to untreated controls. The genes that are known to be associated with antimicrobial sensitivity/resistance are shaded in light blue (adjusted *p-value* < 1e<sup>-5</sup>).

| Name               | Annotation                                                                  | log2 Fold Change | Adjusted P value |
|--------------------|-----------------------------------------------------------------------------|------------------|------------------|
| <i>C3_03460C_A</i> | Protein of unknown function                                                 | 3.45             | 3.54E-23         |
| <i>ADH3</i>        | Putative NAD-dependent (R,R)-butanediol dehydrogenase                       | 3.05             | 2.81E-07         |
| <i>IFD6</i>        | Aldo-keto reductase                                                         | 3.00             | 2.14E-21         |
| <i>ATX1</i>        | Putative cytosolic copper metallochaperone                                  | 2.74             | 3.92E-14         |
| <i>HSP104</i>      | Heat-shock protein                                                          | 2.54             | 1.83E-08         |
| <i>GRP2</i>        | Methylglyoxal reductase                                                     | 2.50             | 4.86E-07         |
| <i>C1_01510W_A</i> | Protein of unknown function                                                 | 2.41             | 1.41E-11         |
| <i>C7_00350C_A</i> | Protein of unknown function                                                 | 2.39             | 4.64E-06         |
| <i>C3_05450C_A</i> | Protein of unknown function                                                 | 2.38             | 4.54E-10         |
| <i>C7_04090C_A</i> | Predicted mitochondrial cardiolipin-specific phospholipase                  | 2.33             | 2.33E-10         |
| <i>CRZ2</i>        | C2H2 transcription factor                                                   | 2.30             | 2.41E-14         |
| <i>CR_09100C_A</i> | Aldo-keto reductase                                                         | 2.30             | 4.70E-09         |
| <i>HSP78</i>       | Heat-shock protein                                                          | 2.23             | 1.33E-08         |
| <i>UGT51C1</i>     | UDP-glucose:sterol glucosyltransferase                                      | 2.20             | 1.95E-19         |
| <i>C7_00770W_A</i> | Protein of unknown function                                                 | 2.19             | 1.73E-08         |
| <i>OPT3</i>        | Oligopeptide transporter                                                    | 2.16             | 1.39E-10         |
| <i>GOR1</i>        | Ortholog(s) have glyoxylate reductase activity                              | 2.16             | 1.86E-08         |
| <i>SRR1</i>        | Two-component system response regulator                                     | 2.15             | 1.81E-10         |
| <i>AAF1</i>        | Possible regulatory protein                                                 | 2.13             | 5.63E-08         |
| <i>WOR4</i>        | Predicted C2H2 zinc finger protein                                          | 2.08             | 6.53E-11         |
| <i>RME1</i>        | Zinc finger protein                                                         | 1.98             | 9.00E-07         |
| <i>SIS1</i>        | Putative Type II HSP40 co-chaperone                                         | 1.98             | 3.87E-06         |
| <i>CR_06140W_A</i> | Protein of unknown function                                                 | 1.96             | 1.56E-08         |
| <i>NRG1</i>        | Transcription factor/repressor                                              | 1.95             | 9.01E-13         |
| <i>YIM1</i>        | Protein similar to protease of mitochondrial inner membrane                 | 1.95             | 6.00E-08         |
| <i>ALK2</i>        | N-Alkane inducible cytochrome P450                                          | 1.93             | 2.75E-13         |
| <i>CSH1</i>        | Aldo-keto reductase                                                         | 1.91             | 3.78E-07         |
| <i>ERO1</i>        | Ortholog of <i>S. cerevisiae</i> Ero1                                       | 1.91             | 1.20E-07         |
| <i>EFG1</i>        | bHLH transcription factor                                                   | 1.88             | 7.64E-09         |
| <i>C5_04030W_A</i> | Protein of unknown function                                                 | 1.85             | 2.15E-06         |
| <i>GAL102</i>      | UDP-glucose 4,6-dehydratase                                                 | 1.85             | 1.54E-06         |
| <i>RFG1</i>        | HMG domain transcriptional repressor of filamentous growth and hyphal genes | 1.81             | 7.32E-10         |
| <i>CDR4</i>        | Putative ABC transporter superfamily                                        | 1.76             | 1.68E-11         |
| <i>INO2</i>        | Transcriptional activator that forms a heterodimer with Ino4p               | 1.76             | 3.13E-07         |
| <i>SNQ2</i>        | Protein similar to <i>S. cerevisiae</i> Sng2p transporter                   | 1.74             | 1.56E-08         |
| <i>C1_09210C_A</i> | Putative transporter                                                        | 1.72             | 2.42E-10         |
| <i>LPG20</i>       | Aldo-keto reductase family protein                                          | 1.71             | 3.87E-06         |
| <i>HSP90</i>       | Essential chaperone                                                         | 1.71             | 3.87E-06         |
| <i>C1_03990W_A</i> | Ortholog(s) have proteasome binding activity                                | 1.64             | 6.48E-06         |
| <i>MOH1</i>        | Ortholog of <i>S. cerevisiae</i> Moh1                                       | 1.61             | 2.14E-09         |
| <i>C1_04010C_A</i> | Protein with a NADP-dependent oxidoreductase domain                         | 1.57             | 1.54E-06         |
| <i>C6_00290W_A</i> | Protein of unknown function                                                 | 1.54             | 4.63E-07         |
| <i>ADA2</i>        | Zinc finger and homeodomain transcriptional coactivator                     | 1.51             | 8.98E-11         |
| <i>C4_02740W_A</i> | Protein of unknown function                                                 | 1.48             | 9.33E-06         |
| <i>C2_00770W_A</i> | Putative protein of unknown function                                        | 1.47             | 9.00E-07         |

|                    |                                                                       |       |          |
|--------------------|-----------------------------------------------------------------------|-------|----------|
| <i>C3_00360W_A</i> | Protein of unknown function                                           | 1.43  | 4.78E-06 |
| <i>ZCF1</i>        | Zn(II)2Cys6 transcription factor                                      | 1.43  | 6.29E-10 |
| <i>ISA1</i>        | Putative mitochondrial iron-sulfur protein                            | 1.39  | 7.93E-07 |
| <i>YOR1</i>        | Protein similar to <i>S. cerevisiae</i> Yor1                          | 1.35  | 3.45E-11 |
| <i>HAL9</i>        | Putative Zn(II)2Cys6 transcription factor                             | 1.35  | 2.48E-07 |
| <i>RPN4</i>        | C2H2 transcription factor                                             | 1.34  | 1.56E-08 |
| <i>CR_06960W_A</i> | Ortholog(s) have ATP binding, DNA replication origin binding activity | 1.29  | 6.48E-06 |
| <i>C2_03690C_A</i> | Protein of unknown function                                           | 1.25  | 1.48E-07 |
| <i>C3_02630C_A</i> | Protein of unknown function                                           | 1.20  | 3.87E-06 |
| <i>RGS2</i>        | Protein of RGS superfamily                                            | 1.17  | 7.97E-06 |
| <i>MHP1</i>        | Protein similar to <i>S. cerevisiae</i> Mhp1p                         | 1.10  | 3.93E-06 |
| <i>CR_10230W_A</i> | Ortholog(s) have histone acetyltransferase activity                   | 1.07  | 8.15E-09 |
| <i>C1_01130W_A</i> | Putative ubiquitin ligase complex component                           | 1.06  | 7.23E-06 |
| <i>CR_07480W_A</i> | A predicted auxin family transmembrane transporter                    | 1.02  | 9.33E-06 |
| <i>C4_03020W_A</i> | Putative mitochondrial GTPase                                         | 0.98  | 2.64E-06 |
| <i>ALS7</i>        | ALS family protein                                                    | 0.95  | 2.83E-06 |
| <i>HOL4</i>        | Putative ion transporter                                              | -1.24 | 1.54E-06 |
| <i>ENA21</i>       | Predicted P-type ATPase sodium pump                                   | -1.59 | 9.11E-06 |
| <i>PHHB</i>        | Putative 4a-hydroxytetrahydrobiopterin dehydratase                    | -1.78 | 1.04E-07 |
| <i>FBA1</i>        | Fructose-bisphosphate aldolase                                        | -1.79 | 5.31E-09 |
| <i>IFR2</i>        | Zinc-binding dehydrogenase                                            | -1.82 | 4.01E-08 |
| <i>PHR1</i>        | Cell surface glycosidase                                              | -1.84 | 3.61E-06 |
| <i>MNN12</i>       | Predicted alpha-1,3-mannosyltransferase                               | -1.90 | 2.89E-06 |
| <i>C6_02100W_A</i> | Secreted protein                                                      | -3.73 | 1.15E-10 |

**Supplementary Table S5: Gene expression data;** Significantly upregulated/downregulated genes in *C. albicans* treated with C12AHL+fluconazole compared to untreated controls. The genes that are known to be associated with antimicrobial sensitivity/resistance are shaded in light blue (adjusted *p-value* < 1e<sup>-5</sup>).



| Name               | Annotation                                                                                   | log2 Fold Change | Adjusted P value |
|--------------------|----------------------------------------------------------------------------------------------|------------------|------------------|
| <i>JEN2</i>        | Dicarboxylic acid transporter                                                                | 5.50             | 3.54E-50         |
| <i>ATX1</i>        | Putative cytosolic copper metallochaperone                                                   | 4.97             | 2.48E-48         |
| <i>RME1</i>        | Zinc finger protein                                                                          | 4.13             | 4.48E-30         |
| <i>CRP1</i>        | Copper transporter                                                                           | 3.86             | 3.57E-26         |
| <i>HSP30</i>       | Putative heat shock protein                                                                  | 3.76             | 4.82E-14         |
| <i>PHO84</i>       | High-affinity phosphate transporter                                                          | 3.73             | 1.68E-13         |
| <i>ADH3</i>        | Putative NAD-dependent (R,R)-butanediol dehydrogenase                                        | 3.71             | 2.22E-11         |
| <i>TPO3</i>        | Putative polyamine transporter                                                               | 3.58             | 1.37E-22         |
| <i>OPT3</i>        | Oligopeptide transporter                                                                     | 3.57             | 3.50E-30         |
| <i>C5_04980W_A</i> | Putative adhesin-like protein                                                                | 3.51             | 5.28E-18         |
| <i>IFE2</i>        | Putative alcohol dehydrogenase                                                               | 3.49             | 4.57E-13         |
| <i>C7_03560W_A</i> | Protein of unknown function                                                                  | 3.47             | 4.79E-38         |
| <i>FCY21</i>       | High affinity, high capacity, hypoxanthine-adenine-guanine-cytosine/H <sup>+</sup> symporter | 3.41             | 6.13E-18         |
| <i>HSP104</i>      | Heat-shock protein                                                                           | 3.34             | 2.05E-15         |
| <i>HSP78</i>       | Heat-shock protein                                                                           | 3.32             | 4.07E-20         |
| <i>HNM3</i>        | Putative transporter                                                                         | 3.32             | 2.84E-12         |
| <i>CTN1</i>        | Carnitine acetyl transferase                                                                 | 3.30             | 5.56E-14         |
| <i>UGT51C1</i>     | UDP-glucose: sterol glucosyltransferase                                                      | 3.21             | 4.24E-43         |
| <i>ZRT2</i>        | Zinc transporter                                                                             | 3.17             | 1.07E-16         |
| <i>C1_11320C_A</i> | Protein of unknown function                                                                  | 3.16             | 4.80E-15         |
| <i>CDR4</i>        | Putative ABC transporter superfamily                                                         | 3.13             | 5.04E-39         |
| <i>C4_07140W_A</i> | Predicted mitochondrial intermembrane space protein                                          | 3.10             | 7.70E-22         |
| <i>ALP1</i>        | Cystine transporter                                                                          | 2.96             | 2.66E-13         |
| <i>SSA2</i>        | HSP70 family chaperone                                                                       | 2.95             | 6.26E-10         |
| <i>GCV2</i>        | Glycine decarboxylase P subunit                                                              | 2.90             | 8.28E-11         |
| <i>C7_00350C_A</i> | Protein of unknown function                                                                  | 2.88             | 1.78E-09         |
| <i>SIT1</i>        | Transporter of ferrichrome siderophores                                                      | 2.87             | 6.07E-10         |
| <i>DLD1</i>        | Putative D-lactate dehydrogenase                                                             | 2.79             | 6.07E-14         |
| <i>FMP45</i>       | Predicted membrane protein induced during mating                                             | 2.71             | 3.36E-08         |
| <i>MDH1-1</i>      | Predicted malate dehydrogenase precursor                                                     | 2.67             | 5.83E-07         |
| <i>HSP21</i>       | Small heat shock protein                                                                     | 2.65             | 5.86E-08         |
| <i>CAN1</i>        | Basic amino acid permease                                                                    | 2.65             | 1.81E-08         |
| <i>C6_00810C_A</i> | Protein of unknown function                                                                  | 2.47             | 3.77E-08         |
| <i>CR_08880C_A</i> | Protein of unknown function                                                                  | 2.47             | 3.83E-15         |
| <i>CYS3</i>        | Cystathionine gamma-lyase; induced by alkaline, amphotericin B                               | 2.46             | 6.06E-06         |
| <i>C1_08350C_A</i> | Ortholog of <i>C. dubliniensis</i> CD36: Cd36_02630                                          | 2.38             | 3.96E-14         |
| <i>ELF1</i>        | Putative mRNA export protein                                                                 | 2.37             | 6.55E-06         |
| <i>MUP1</i>        | Putative high affinity methionine permease                                                   | 2.35             | 2.37E-08         |

|                    |                                                                                       |      |          |
|--------------------|---------------------------------------------------------------------------------------|------|----------|
| <i>C1_07160C_A</i> | Protein conserved among the CTG-clade                                                 | 2.35 | 4.40E-07 |
| <i>GIT3</i>        | Glycerophosphocholine permease                                                        | 2.35 | 8.31E-13 |
| <i>C2_03110W_A</i> | Protein of unknown function                                                           | 2.33 | 9.30E-11 |
| <i>C7_01170C_A</i> | Putative oxidoreductase                                                               | 2.28 | 1.25E-06 |
| <i>GNP1</i>        | Similar to asparagine and glutamine permease                                          | 2.26 | 5.40E-16 |
| <i>SSC1</i>        | Heat shock protein                                                                    | 2.25 | 4.72E-21 |
| <i>tV(AAC)4</i>    | tRNA-Val                                                                              | 2.24 | 4.45E-07 |
| <i>C7_04090C_A</i> | Predicted mitochondrial cardiolipin-specific phospholipase                            | 2.24 | 1.99E-10 |
| <i>ARG1</i>        | Argininosuccinate synthase                                                            | 2.23 | 7.64E-08 |
| <i>CTA4</i>        | Zn(II)2Cys6 transcription factor                                                      | 2.23 | 4.72E-11 |
| <i>AQY1</i>        | Aquaporin water channel                                                               | 2.22 | 1.60E-08 |
| <i>C6_00290W_A</i> | Protein of unknown function                                                           | 2.21 | 2.13E-15 |
| <i>C6_03180C_A</i> | Ortholog(s) have protein binding, bridging, ubiquitin protein ligase binding activity | 2.20 | 4.99E-09 |
| <i>C2_00760C_A</i> | Protein of unknown function                                                           | 2.20 | 8.21E-11 |
| <i>CDR11</i>       | Putative transporter of PDR subfamily                                                 | 2.18 | 3.82E-18 |
| <i>RPS27A</i>      | Ribosomal protein S27                                                                 | 2.16 | 4.11E-09 |
| <i>GRF10</i>       | Putative homeodomain transcription factor                                             | 2.11 | 7.64E-10 |
| <i>NDT80</i>       | Meiosis-specific transcription factor                                                 | 2.11 | 3.13E-12 |
| <i>ALR1</i>        | Putative transporter of divalent cations                                              | 2.09 | 1.58E-06 |
| <i>C1_13820C_A</i> | Protein of unknown function                                                           | 2.08 | 3.87E-09 |
| <i>KGD1</i>        | Putative 2-oxoglutarate dehydrogenase                                                 | 2.08 | 7.55E-10 |
| <i>SIS1</i>        | Putative Type II HSP40 co-chaperone                                                   | 2.06 | 2.22E-07 |
| <i>DED1</i>        | Predicted ATP-dependent RNA helicase                                                  | 2.05 | 2.26E-09 |
| <i>PHO87</i>       | Putative phosphate permease                                                           | 2.05 | 6.46E-09 |
| <i>CPH2</i>        | Myc-bHLH transcription factor                                                         | 2.04 | 7.55E-17 |
| <i>C7_00880C_A</i> | Protein of unknown function                                                           | 2.02 | 1.97E-10 |
| <i>PTR22</i>       | Oligopeptide transporter                                                              | 2.01 | 4.78E-08 |
| <i>SUL2</i>        | Putative sulfate transporter                                                          | 1.97 | 6.15E-10 |
| <i>CR_08420W_A</i> | Putative DnaJ-like heat shock/chaperone                                               | 1.96 | 4.04E-06 |
| <i>C2_08100W_A</i> | Mitochondrial apoptosis-inducing factor                                               | 1.95 | 2.05E-06 |
| <i>MET3</i>        | ATP sulfurylase                                                                       | 1.94 | 7.42E-06 |
| <i>C2_06440C_A</i> | Protein with homology to peroxisomal membrane proteins                                | 1.93 | 2.60E-06 |
| <i>COX15</i>       | Cytochrome oxidase assembly protein                                                   | 1.93 | 4.99E-09 |
| <i>ARD</i>         | D-arabitol dehydrogenase                                                              | 1.92 | 7.27E-19 |
| <i>ALS7</i>        | ALS family protein                                                                    | 1.92 | 1.57E-26 |
| <i>C1_01130W_A</i> | Putative ubiquitin ligase complex component                                           | 1.91 | 1.06E-19 |
| <i>C7_03590C_A</i> | Putative member of the multi-drug and toxin extrusion (MATE) family                   | 1.90 | 1.44E-06 |
| <i>CR_06960W_A</i> | Ortholog(s) have ATP binding, DNA replication origin binding activity                 | 1.90 | 3.68E-13 |
| <i>GOR1</i>        | Ortholog(s) have glyoxylate reductase activity                                        | 1.90 | 2.97E-07 |
| <i>CAN3</i>        | Predicted amino acid transmembrane transporter                                        | 1.89 | 8.06E-11 |

|                    |                                                                                   |      |          |
|--------------------|-----------------------------------------------------------------------------------|------|----------|
| <i>HSP90</i>       | Essential chaperone                                                               | 1.86 | 5.25E-08 |
| <i>ST11</i>        | Protein that interacts with Cdc37 and Crk1 in two-hybrid                          | 1.86 | 2.42E-07 |
| <i>MNN22</i>       | Alpha-1,2-mannosyltransferase                                                     | 1.86 | 2.25E-15 |
| <i>SNQ2</i>        | Protein similar to <i>S. cerevisiae</i> Snq2p transporter                         | 1.84 | 2.49E-10 |
| <i>MET2</i>        | Homoserine acetyltransferase                                                      | 1.84 | 1.41E-07 |
| <i>ITR1</i>        | MFS inositol transporter                                                          | 1.83 | 1.68E-09 |
| <i>ALS1</i>        | Cell-surface adhesin                                                              | 1.83 | 4.55E-08 |
| <i>RIM101</i>      | Transcription factor                                                              | 1.80 | 5.30E-11 |
| <i>PLB3</i>        | GPI-anchored cell surface phospholipase B                                         | 1.80 | 3.10E-07 |
| <i>C4_05900C_A</i> | Protein of unknown function                                                       | 1.80 | 2.82E-12 |
| <i>ROA1</i>        | Putative PDR-subfamily ABC transporter                                            | 1.79 | 9.99E-09 |
| <i>CR_07170W_A</i> | Possible dehydrogenase                                                            | 1.78 | 3.28E-09 |
| <i>C6_03200W_A</i> | Ortholog of <i>C. dubliniensis</i> CD36 : Cd36_63860                              | 1.78 | 2.23E-12 |
| <i>GIT2</i>        | Putative glycerophosphoinositol permease                                          | 1.77 | 2.36E-07 |
| <i>PDE2</i>        | High affinity cyclic nucleotide phosphodiesterase                                 | 1.77 | 3.53E-10 |
| <i>C3_01260C_A</i> | Putative adhesin-like protein                                                     | 1.76 | 2.13E-07 |
| <i>TUF1</i>        | Translation elongation factor TU                                                  | 1.75 | 1.80E-09 |
| <i>YIM1</i>        | Protein similar to protease of mitochondrial inner membrane                       | 1.75 | 3.63E-07 |
| <i>HSP60</i>       | Heat shock protein                                                                | 1.73 | 3.68E-13 |
| <i>RNR3</i>        | Putative ribonucleotide reductase large subunit                                   | 1.72 | 7.33E-11 |
| <i>GAP5</i>        | General amino acid permease                                                       | 1.71 | 7.67E-08 |
| <i>MDJ1</i>        | Putative member of the HSP40 (DnaJ) family of chaperones                          | 1.69 | 5.21E-07 |
| <i>RPO41</i>       | Putative mitochondrial RNA polymerase                                             | 1.69 | 2.75E-06 |
| <i>C5_00570W_A</i> | Putative aminophospholipid translocase (flippase)                                 | 1.69 | 1.62E-07 |
| <i>C6_01620W_A</i> | RING/FYVE/PHD zinc finger protein                                                 | 1.68 | 2.37E-13 |
| <i>C3_00840C_A</i> | Ortholog(s) have mitochondrion localization                                       | 1.68 | 2.22E-06 |
| <i>CR_03120W_A</i> | Ortholog of <i>S. cerevisiae</i> Mpm1                                             | 1.68 | 1.90E-15 |
| <i>HAL9</i>        | Putative Zn(II)2Cys6 transcription factor                                         | 1.66 | 7.61E-12 |
| <i>TIM23</i>       | Protein involved in mitochondrial matrix protein import                           | 1.66 | 1.04E-14 |
| <i>FET31</i>       | Putative multicopper oxidase                                                      | 1.65 | 3.85E-06 |
| <i>C1_08520C_A</i> | Ortholog(s) have structural constituent of ribosome activity                      | 1.64 | 8.63E-12 |
| <i>MIF2</i>        | Centromere-associated protein                                                     | 1.64 | 1.04E-24 |
| <i>HRR25</i>       | Predicted protein serine/threonine kinase                                         | 1.63 | 2.15E-08 |
| <i>CR_10470C_A</i> | Ortholog(s) have role in maturation of SSU-rRNA from tricistronic rRNA transcript | 1.63 | 2.74E-06 |
| <i>MSS116</i>      | Putative DEAD-box protein                                                         | 1.62 | 7.61E-06 |
| <i>DCK1</i>        | Putative guanine nucleotide exchange factor                                       | 1.61 | 4.47E-06 |
| <i>GCN4</i>        | bZIP transcription factor                                                         | 1.61 | 3.12E-06 |
| <i>C5_02590C_A</i> | Putative mitochondrial membrane protein                                           | 1.60 | 9.23E-06 |
| <i>C2_10090C_A</i> | Ortholog(s) have mitochondrion localization                                       | 1.60 | 1.48E-08 |
| <i>RIM2</i>        | Putative mitochondrial carrier protein                                            | 1.59 | 1.58E-07 |
| <i>SSY1</i>        | Amino acid sensor                                                                 | 1.58 | 2.17E-07 |

|                    |                                                                               |      |          |
|--------------------|-------------------------------------------------------------------------------|------|----------|
| <i>ISW2</i>        | Ortholog of <i>S. cerevisiae</i> Isw2                                         | 1.57 | 9.68E-09 |
| <i>C6_03440W_A</i> | Ortholog(s) have rRNA binding activity                                        | 1.57 | 1.75E-09 |
| <i>CR_03940W_A</i> | Putative rRNA processing protein                                              | 1.56 | 3.69E-08 |
| <i>HNM1</i>        | Putative choline/ethanolamine transporter                                     | 1.55 | 1.41E-07 |
| <i>C2_04790C_A</i> | Ortholog(s) have structural constituent of ribosome activity                  | 1.55 | 2.93E-09 |
| <i>C2_03490C_A</i> | Ortholog of <i>C. dubliniensis</i> CD36: Cd36_18230                           | 1.54 | 1.37E-11 |
| <i>CCC1</i>        | Manganese transporter                                                         | 1.52 | 3.42E-06 |
| <i>C4_03410W_A</i> | Ortholog(s) have structural constituent of ribosome activity                  | 1.52 | 2.37E-13 |
| <i>GIS2</i>        | Translational activator for mRNAs                                             | 1.52 | 9.61E-09 |
| <i>HIP1</i>        | Amino acid permeases                                                          | 1.51 | 7.94E-14 |
| <i>MGE1</i>        | Putative mitochondrial matrix cochaperone                                     | 1.51 | 3.33E-07 |
| <i>CR_09620C_A</i> | Ortholog(s) have phosphatidic acid transporter activity                       | 1.51 | 5.68E-06 |
| <i>C5_04050W_A</i> | Plasma membrane-localized protein of unknown function                         | 1.50 | 4.42E-08 |
| <i>MSI3</i>        | Essential HSP70 family protein                                                | 1.49 | 2.10E-06 |
| <i>SFP1</i>        | C2H2 transcription factor involved in regulation of biofilm formation         | 1.49 | 5.13E-06 |
| <i>ZCF29</i>       | Zn (II)2Cys6 transcription factor                                             | 1.48 | 4.04E-11 |
| <i>WSC1</i>        | Putative cell wall component                                                  | 1.46 | 6.09E-10 |
| <i>MIR1</i>        | Putative mitochondrial phosphate transporter                                  | 1.46 | 7.19E-07 |
| <i>C3_01850W_A</i> | Ortholog(s) have structural constituent of ribosome activity                  | 1.45 | 2.84E-07 |
| <i>C1_14190C_A</i> | Protein phosphatase inhibitor                                                 | 1.45 | 7.85E-07 |
| <i>MIA40</i>       | Predicted component of the mitochondrial intermembrane space import machinery | 1.44 | 1.54E-09 |
| <i>C5_02740W_A</i> | Ortholog(s) have oxidoreductase activity                                      | 1.43 | 1.09E-11 |
| <i>C4_00920C_A</i> | Possible similarity to mutator-like element (MULE) transposase                | 1.43 | 7.23E-06 |
| <i>CDC34</i>       | Putative ubiquitin-protein ligase                                             | 1.43 | 2.57E-06 |
| <i>RSN1</i>        | Protein of unknown function                                                   | 1.43 | 1.89E-10 |
| <i>MRPL10</i>      | Putative mitochondrial large subunit ribosomal protein                        | 1.43 | 6.62E-08 |
| <i>C1_01150C_A</i> | Ortholog(s) have tRNA methyltransferase activity                              | 1.43 | 6.98E-07 |
| <i>C1_13060C_A</i> | Ortholog(s) have role in mitochondrial translation                            | 1.42 | 6.33E-06 |
| <i>HEM1</i>        | Putative 5-aminolevulinate synthase                                           | 1.41 | 9.55E-06 |
| <i>FLO8</i>        | Transcription factor                                                          | 1.41 | 8.50E-09 |
| <i>CRZ2</i>        | C2H2 transcription factor                                                     | 1.38 | 4.41E-06 |
| <i>RIM9</i>        | Protein required for alkaline pH response                                     | 1.38 | 5.32E-09 |
| <i>C1_06350W_A</i> | Protein of unknown function                                                   | 1.38 | 2.87E-08 |
| <i>FGR15</i>       | Putative transcription factor with zinc finger DNA-binding motif              | 1.37 | 9.45E-11 |
| <i>CR_06230W_A</i> | Predicted cation transmembrane transporter                                    | 1.37 | 2.24E-07 |
| <i>C5_00250C_A</i> | Protein with a predicted role in microtubule-related processes                | 1.37 | 3.23E-08 |
| <i>WHI3</i>        | Putative RNA binding protein                                                  | 1.36 | 2.90E-08 |
| <i>PTC8</i>        | Predicted type 2C protein phosphatase                                         | 1.34 | 5.96E-07 |
| <i>MRPL3</i>       | Ribosomal protein of the large subunit                                        | 1.33 | 1.79E-06 |

|                    |                                                                             |      |          |
|--------------------|-----------------------------------------------------------------------------|------|----------|
| <i>SCO1</i>        | Putative copper transporter                                                 | 1.33 | 7.38E-06 |
| <i>C1_04370C_A</i> | Ortholog(s) have structural constituent of ribosome activity                | 1.33 | 7.20E-07 |
| <i>C2_02180W_A</i> | Vacuolar membrane zinc transporter                                          | 1.33 | 4.40E-10 |
| <i>C5_01700W_A</i> | Mitochondrial ribosomal protein of the large subunit                        | 1.32 | 3.86E-06 |
| <i>MSW1</i>        | Mitochondrial tryptophanyl-tRNA synthetase                                  | 1.32 | 1.95E-10 |
| <i>C7_03000C_A</i> | Ortholog(s) have structural constituent of ribosome activity                | 1.32 | 6.47E-10 |
| <i>MNN23</i>       | Alpha-1,2-mannosyltransferase                                               | 1.31 | 5.09E-07 |
| <i>C6_00920W_A</i> | Putative mitochondrial intermembrane space protein                          | 1.31 | 4.83E-06 |
| <i>DOT6</i>        | Protein with a predicted role in telomeric gene silencing and filamentation | 1.30 | 9.45E-06 |
| <i>C1_14090W_A</i> | Ortholog(s) have chaperone binding, unfolded protein binding activity       | 1.29 | 2.26E-08 |
| <i>C1_05210C_A</i> | Protein of unknown function                                                 | 1.29 | 7.40E-09 |
| <i>SSU81</i>       | Predicted adaptor protein                                                   | 1.28 | 2.36E-07 |
| <i>FZO1</i>        | Mitochondrial biogenesis protein                                            | 1.28 | 4.29E-06 |
| <i>CTA2</i>        | Putative transcription factor                                               | 1.27 | 2.93E-07 |
| <i>CR_10420W_A</i> | Protein with a mitochondrial distribution and morphology domain             | 1.25 | 7.63E-10 |
| <i>ADA2</i>        | Zinc finger and homeodomain transcriptional coactivator                     | 1.24 | 3.29E-08 |
| <i>CWC22</i>       | Predicted spliceosome-associated protein                                    | 1.24 | 1.03E-08 |
| <i>C2_07440C_A</i> | Ortholog(s) have sterol esterase activity                                   | 1.22 | 3.22E-08 |
| <i>BRE1</i>        | Putative transcription factor with C3HC4 zinc finger DNA-binding motif      | 1.21 | 5.25E-06 |
| <i>C6_03730C_A</i> | Ortholog(s) have structural constituent of ribosome activity                | 1.19 | 7.21E-07 |
| <i>C1_14330W_A</i> | Ortholog(s) have tRNA-5-taurinomethyluridine 2-sulfurtransferase activity   | 1.19 | 1.57E-06 |
| <i>LCB4</i>        | Putative sphingosine kinase                                                 | 1.18 | 2.64E-06 |
| <i>C7_01910C_A</i> | Similar to bacterial DnaJ                                                   | 1.17 | 4.57E-09 |
| <i>CR_08470W_A</i> | Protein involved in N-glycosylation                                         | 1.16 | 2.84E-07 |
| <i>C2_05380W_A</i> | Protein of unknown function                                                 | 1.16 | 3.59E-06 |
| <i>CR_04580W_A</i> | Ortholog(s) have structural constituent of ribosome activity                | 1.16 | 9.24E-06 |
| <i>OPY2</i>        | Predicted transmembrane protein                                             | 1.15 | 2.85E-06 |
| <i>REG1</i>        | Putative protein phosphatase regulatory subunit                             | 1.14 | 1.84E-06 |
| <i>STP2</i>        | Amino-acid-regulated transcription factor                                   | 1.14 | 3.24E-06 |
| <i>DFG5</i>        | N-linked mannoprotein                                                       | 1.13 | 1.79E-07 |
| <i>C1_13880C_A</i> | C2H2 transcription factor                                                   | 1.12 | 8.35E-08 |
| <i>KCS1</i>        | Putative bZIP transcription factor                                          | 1.12 | 1.31E-07 |
| <i>C4_00910C_A</i> | Protein with similarity to mutator-like element (MULE) transposase          | 1.12 | 1.26E-09 |
| <i>C2_03560C_A</i> | Ortholog(s) have structural constituent of ribosome activity                | 1.10 | 3.74E-06 |
| <i>C3_03250W_A</i> | Putative haloacid dehalogenase                                              | 1.09 | 6.73E-06 |
| <i>YOR1</i>        | ABC-type plasma membrane transporter                                        | 1.09 | 4.21E-08 |
| <i>ALS6</i>        | ALS family protein                                                          | 1.08 | 2.56E-08 |
| <i>C1_11850W_A</i> | Protein of unknown function                                                 | 1.08 | 4.77E-06 |

|                    |                                                                                    |       |          |
|--------------------|------------------------------------------------------------------------------------|-------|----------|
| <i>CHO2</i>        | Putative phosphatidyl-ethanolamine N-methyltransferase                             | 1.06  | 9.19E-07 |
| <i>CR_01370C_A</i> | Ortholog(s) have structural constituent of ribosome activity                       | 1.06  | 4.40E-06 |
| <i>CR_03110W_A</i> | Ortholog(s) have role in mitochondrial translation                                 | 1.05  | 5.42E-07 |
| <i>SMC4</i>        | Ortholog(s) have ATPase activity                                                   | 1.05  | 6.73E-06 |
| <i>RPN4</i>        | C2H2 transcription factor                                                          | 1.03  | 8.03E-06 |
| <i>C4_04240C_A</i> | Ortholog of <i>S. cerevisiae</i> Skg6                                              | 1.02  | 5.61E-06 |
| <i>AFG3</i>        | a subunit of the mitochondrial inner membrane m-AAA protease                       | 1.02  | 4.94E-13 |
| <i>ARF1</i>        | ADP-ribosylation factor                                                            | 1.01  | 1.42E-07 |
| <i>IFM1</i>        | Putative mitochondrial translation initiation factor                               | 0.99  | 7.11E-06 |
| <i>C7_03840W_A</i> | CCR4-NOT complex component                                                         | 0.98  | 1.80E-06 |
| <i>C2_00730C_A</i> | Ortholog of <i>C. dubliniensis</i> CD36 : Cd36_15670                               | 0.98  | 7.61E-17 |
| <i>NBP35</i>       | Similar to nucleotide-binding proteins                                             | 0.97  | 3.15E-06 |
| <i>C5_00350C_A</i> | Putative DnaJ-like chaperone                                                       | 0.96  | 4.07E-06 |
| <i>C4_03780C_A</i> | Putative mitochondrial membrane protein                                            | 0.95  | 1.58E-07 |
| <i>C6_00390W_A</i> | Ortholog(s) have serine-tRNA ligase activity                                       | 0.95  | 6.24E-08 |
| <i>C1_02750C_A</i> | Ortholog(s) have DNA translocase activity                                          | 0.94  | 5.07E-06 |
| <i>C2_07060W_A</i> | Ortholog(s) have RNA binding activity                                              | 0.92  | 5.68E-06 |
| <i>SWI6</i>        | Putative component of the MBF and SBF transcription complexes                      | 0.84  | 1.97E-09 |
| <i>C6_03460W_A</i> | Nucleoporin component of central core of the nuclear pore complex                  | 0.82  | 1.70E-06 |
| <i>PBP2</i>        | Putative RNA binding protein                                                       | 0.79  | 1.57E-06 |
| <i>MBP1</i>        | Putative component of the MBF transcription complex                                | 0.77  | 1.16E-06 |
| <i>WAR1</i>        | Zn(II)2Cys6 transcription factor                                                   | 0.77  | 4.25E-07 |
| <i>PDR6</i>        | Putative pleiotropic drug resistance regulatory protein 6                          | 0.73  | 2.56E-08 |
| <i>C5_03940C_A</i> | Putative multidrug resistance protein; upregulated by Efg1p                        | -0.63 | 2.93E-06 |
| <i>C1_02720W_A</i> | Putative transcription factor                                                      | -0.67 | 1.16E-06 |
| <i>C3_06260C_A</i> | Ortholog of <i>C. dubliniensis</i> CD36 : Cd36_86220                               | -0.68 | 9.05E-06 |
| <i>VPS8</i>        | Putative vacuolar sorting protein                                                  | -0.70 | 9.83E-08 |
| <i>ZCF9</i>        | Putative Zn(II)2Cys6 transcription factor                                          | -0.70 | 8.35E-09 |
| <i>C3_05010C_A</i> | Putative DNA repair helicase                                                       | -0.78 | 1.13E-06 |
| <i>C7_01650W_A</i> | RNA polymerase III transcription initiation factor complex (TFIIIC) subunit        | -0.79 | 9.93E-06 |
| <i>PSD1</i>        | Phosphatidylserine decarboxylase                                                   | -0.81 | 8.54E-06 |
| <i>C2_01490C_A</i> | Putative RNA polymerase transcription factor TFIIF core component                  | -0.82 | 9.00E-06 |
| <i>APL5</i>        | Ortholog of <i>S. cerevisiae</i> and <i>S. pombe</i> Apl5                          | -0.88 | 1.19E-06 |
| <i>C4_01790W_A</i> | Adapter protein for pexophagy and the cytoplasm-to-vacuole targeting (Cvt) pathway | -0.88 | 2.60E-06 |
| <i>ORC3</i>        | A component of the origin recognition complex                                      | -0.89 | 7.15E-07 |
| <i>CWH43</i>       | Putative sensor/transporter protein                                                | -0.90 | 1.14E-06 |



|                    |                                                                         |       |          |
|--------------------|-------------------------------------------------------------------------|-------|----------|
| <i>CR_08550W_A</i> | Ortholog(s) have fructose-2,6-bisphosphate 2-phosphatase activity       | -0.91 | 5.29E-06 |
| <i>CR_01130W_A</i> | Ortholog(s) have role in positive regulation of TORC1 signaling         | -0.93 | 4.86E-08 |
| <i>GPA2</i>        | G-protein alpha subunit                                                 | -0.93 | 6.18E-06 |
| <i>PKH2</i>        | Putative serine/threonine protein kinase                                | -0.93 | 3.45E-07 |
| <i>POM152</i>      | Putative nuclear pore membrane glycoprotein                             | -0.94 | 2.53E-07 |
| <i>C1_12740W_A</i> | Predicted cysteine proteinase domain                                    | -0.95 | 4.93E-07 |
| <i>MKC1</i>        | MAP kinase                                                              | -0.96 | 6.33E-06 |
| <i>RTA2</i>        | Flippase                                                                | -0.96 | 2.22E-07 |
| <i>CR_06470W_A</i> | Ortholog(s) have ubiquitin protein ligase activity                      | -0.98 | 8.06E-06 |
| <i>C3_02690C_A</i> | Ortholog(s) have dolichol kinase activity                               | -0.99 | 3.45E-06 |
| <i>C1_00920W_A</i> | Ortholog(s) have cell division site                                     | -0.99 | 1.10E-06 |
| <i>LYS12</i>       | Homoisocitrate dehydrogenase                                            | -1.01 | 4.08E-06 |
| <i>C3_07230W_A</i> | Aminophospholipid translocase (flippase)                                | -1.01 | 3.72E-11 |
| <i>C2_02020W_A</i> | Ortholog(s) have Lys48-specific deubiquitinase activity                 | -1.01 | 9.92E-06 |
| <i>C5_01350W_A</i> | Ortholog(s) have role in ER-dependent peroxisome organization           | -1.01 | 5.36E-07 |
| <i>ERV46</i>       | Putative ER-derived vesicle protein                                     | -1.03 | 5.57E-07 |
| <i>C5_00330C_A</i> | Ortholog(s) have role in fermentation                                   | -1.03 | 1.25E-06 |
| <i>C3_03430C_A</i> | Ortholog(s) have role in ATP export                                     | -1.03 | 3.64E-07 |
| <i>HEM2</i>        | Putative porphobilinogen synthase                                       | -1.04 | 7.87E-07 |
| <i>C1_04780C_A</i> | Ortholog(s) have role in negative regulation of TORC1 signaling         | -1.04 | 6.72E-13 |
| <i>C4_00380W_A</i> | Ortholog(s) have D-arabinose 1-dehydrogenase [NAD(P)+] activity         | -1.04 | 9.05E-08 |
| <i>VPS1</i>        | Dynamain-family GTPase-related protein                                  | -1.04 | 1.06E-06 |
| <i>C2_05850C_A</i> | Ortholog(s) have role in CVT pathway                                    | -1.05 | 1.52E-07 |
| <i>SSN8</i>        | A component of RNA polymerase II holoenzyme                             | -1.06 | 9.32E-08 |
| <i>CR_05890C_A</i> | Ortholog(s) have acetyltransferase activator activity                   | -1.06 | 5.67E-08 |
| <i>NUP82</i>       | Linker nucleoporin of the nuclear pore complex                          | -1.07 | 2.16E-06 |
| <i>SHE3</i>        | mRNA-binding protein                                                    | -1.07 | 9.76E-08 |
| <i>C4_03130W_A</i> | Putative GPI transamidase component                                     | -1.08 | 2.57E-06 |
| <i>C2_07010W_A</i> | Predicted ER protein                                                    | -1.08 | 3.80E-08 |
| <i>C1_03330C_A</i> | Ortholog(s) have phosphatidylinositol-3,5-bisphosphate binding activity | -1.09 | 1.19E-12 |
| <i>C4_05800C_A</i> | Protein of unknown function                                             | -1.09 | 4.92E-06 |
| <i>CHS7</i>        | Protein required for wild-type chitin synthase III activity             | -1.10 | 1.74E-07 |
| <i>C5_01090C_A</i> | Planktonic growth-induced gene                                          | -1.11 | 9.93E-06 |
| <i>SOL3</i>        | Putative 6-phosphogluconolactonase                                      | -1.11 | 6.06E-06 |
| <i>C5_04320C_A</i> | RNI-like superfamily domain-containing protein                          | -1.11 | 2.02E-08 |
| <i>CR_04080C_A</i> | Endoplasmic reticulum (ER) protein-translocation complex subunit        | -1.11 | 4.82E-09 |
| <i>PCT1</i>        | Putative choline-phosphate cytidylyl transferase                        | -1.11 | 5.81E-06 |

|                    |                                                                                                |       |          |
|--------------------|------------------------------------------------------------------------------------------------|-------|----------|
| <i>CAS4</i>        | RAM cell wall integrity signaling network protein                                              | -1.11 | 3.47E-09 |
| <i>C4_01430C_A</i> | Protein of unknown function                                                                    | -1.12 | 5.97E-06 |
| <i>C1_12400C_A</i> | Ortholog of <i>Candida albicans</i> WO-1 : CAWG_00201                                          | -1.12 | 4.40E-06 |
| <i>GSL2</i>        | Protein similar to beta-1,3-glucan synthase                                                    | -1.12 | 6.15E-06 |
| <i>CCH1</i>        | Voltage-gated Ca <sup>2+</sup> channel of the high affinity calcium uptake system              | -1.13 | 2.72E-11 |
| <i>USO1</i>        | Ortholog(s) have role in ER to Golgi vesicle-mediated transport                                | -1.13 | 4.70E-07 |
| <i>VPS36</i>       | ESCRT II protein sorting complex subunit                                                       | -1.13 | 2.56E-08 |
| <i>C1_10140C_A</i> | Protein of unknown function                                                                    | -1.14 | 5.41E-06 |
| <i>LSC1</i>        | Putative succinate-CoA ligase subunit                                                          | -1.15 | 4.83E-06 |
| <i>C4_06020C_A</i> | Ortholog(s) have DNA-directed DNA polymerase activity                                          | -1.16 | 1.04E-10 |
| <i>C3_06800C_A</i> | Ortholog(s) have NEDD8 transferase activity                                                    | -1.16 | 2.26E-06 |
| <i>C1_12170C_A</i> | Ortholog(s) have cytoplasm localization                                                        | -1.17 | 2.67E-06 |
| <i>MYO2</i>        | Class V myosin                                                                                 | -1.17 | 3.75E-06 |
| <i>C7_00140C_A</i> | Ortholog(s) have cytosol, nucleus localization                                                 | -1.17 | 2.59E-10 |
| <i>CDC10</i>       | Septin                                                                                         | -1.18 | 7.23E-06 |
| <i>AGE1</i>        | Putative GTPase activator                                                                      | -1.18 | 1.37E-07 |
| <i>C5_02050W_A</i> | Ortholog(s) have role in Golgi to endosome transport                                           | -1.18 | 3.08E-10 |
| <i>CR_09340W_A</i> | Ortholog(s) have ubiquitin conjugating enzyme activity                                         | -1.19 | 5.25E-08 |
| <i>C1_02440C_A</i> | Ortholog(s) have thiol-dependent ubiquitin-specific protease activity                          | -1.19 | 3.06E-06 |
| <i>INP51</i>       | Putative phosphatidylinositol-4,5-bisphosphate phosphatase                                     | -1.19 | 1.13E-06 |
| <i>DBR1</i>        | Debranchase                                                                                    | -1.19 | 6.22E-08 |
| <i>AYR1</i>        | Putative oxidoreductase                                                                        | -1.19 | 3.37E-06 |
| <i>GIG1</i>        | Protein induced by N-acetylglucosamine (GlcNAc                                                 | -1.20 | 3.36E-06 |
| <i>SEN1</i>        | Putative helicase                                                                              | -1.20 | 4.61E-08 |
| <i>IML2</i>        | Protein of unknown function                                                                    | -1.20 | 1.22E-07 |
| <i>TUB1</i>        | Alpha-tubulin                                                                                  | -1.21 | 2.30E-07 |
| <i>TIP120</i>      | protein involved in regulation of SCF complexes                                                | -1.21 | 6.36E-06 |
| <i>C5_01940W_A</i> | Ortholog(s) have 2,5-diamino-6-ribitylamino-4(3H)-pyrimidinone 5'-phosphate deaminase activity | -1.21 | 4.23E-09 |
| <i>PTP3</i>        | Putative protein tyrosine phosphatase                                                          | -1.21 | 1.17E-07 |
| <i>CLA4</i>        | Ste20p family Ser/Thr kinase                                                                   | -1.21 | 3.92E-06 |
| <i>CR_08430W_A</i> | A protein involved in regulated synthesis of PtdIns(3,5)P(2)                                   | -1.21 | 5.04E-12 |
| <i>C1_01400C_A</i> | Ortholog(s) have sphingosine-1-phosphate phosphatase activity                                  | -1.23 | 1.72E-06 |
| <i>TEL1</i>        | Ortholog(s) have protein serine/threonine kinase activity                                      | -1.23 | 3.29E-16 |
| <i>C2_07650C_A</i> | Ortholog(s) have extracellular region localization                                             | -1.24 | 9.75E-06 |
| <i>C3_06750W_A</i> | Ortholog(s) have P-P-bond-hydrolysis-driven protein transmembrane transporter activity         | -1.24 | 1.60E-06 |
| <i>NPT1</i>        | Putative nicotinate phosphoribosyltransferase                                                  | -1.25 | 3.21E-11 |
| <i>BMT3</i>        | Beta-mannosyltransferase                                                                       | -1.26 | 1.29E-06 |



|                    |                                                                                       |       |          |
|--------------------|---------------------------------------------------------------------------------------|-------|----------|
| <i>CR_01080W_A</i> | Putative ortholog of <i>S. cerevisiae</i> Laa1p                                       | -1.26 | 3.63E-07 |
| <i>C1_08180C_A</i> | Putative oxysterol-binding protein                                                    | -1.26 | 5.83E-06 |
| <i>RBK1</i>        | Ortholog(s) have cytosol, nucleus localization                                        | -1.27 | 3.72E-06 |
| <i>C2_05720C_A</i> | Putative oxysterol binding protein family                                             | -1.27 | 3.05E-13 |
| <i>SEC7</i>        | Putative guanine nucleotide exchange factor                                           | -1.27 | 1.97E-11 |
| <i>C4_06130W_A</i> | Ortholog(s) have tubulin binding activity                                             | -1.28 | 3.86E-09 |
| <i>C3_02080W_A</i> | Has domain(s) with predicted zinc ion binding activity                                | -1.28 | 1.09E-11 |
| <i>C1_02770W_A</i> | Protein of unknown function                                                           | -1.29 | 7.82E-09 |
| <i>KTR4</i>        | Mannosyltransferase                                                                   | -1.30 | 1.16E-07 |
| <i>ARO80</i>       | Zn(II)2Cys6 transcription factor                                                      | -1.30 | 3.47E-14 |
| <i>COQ6</i>        | Ortholog(s) have oxidoreductase activity                                              | -1.31 | 1.17E-12 |
| <i>C6_00890W_A</i> | Ortholog(s) have cytoplasm localization                                               | -1.31 | 5.54E-09 |
| <i>C6_01960W_A</i> | Ortholog of <i>C. dubliniensis</i> CD36 : Cd36_62090                                  | -1.32 | 6.36E-06 |
| <i>CYK3</i>        | Essential protein involved in cytokinesis                                             | -1.32 | 1.76E-07 |
| <i>SEC13</i>       | Putative protein transport factor                                                     | -1.32 | 1.34E-07 |
| <i>MPT5</i>        | Putative RNA-binding protein                                                          | -1.34 | 1.22E-11 |
| <i>ACF2</i>        | Putative endo-1,3-beta-glucanase                                                      | -1.34 | 2.86E-07 |
| <i>C3_07770C_A</i> | Ortholog(s) have microtubule binding, protein homodimerization activity               | -1.34 | 1.29E-10 |
| <i>BFR1</i>        | Protein involved in the maintenance of normal ploidy                                  | -1.34 | 4.07E-07 |
| <i>LIG4</i>        | DNA ligase                                                                            | -1.35 | 5.14E-10 |
| <i>C2_09480W_A</i> | Ortholog(s) have DNA-directed DNA polymerase activity                                 | -1.35 | 2.03E-08 |
| <i>RHO2</i>        | Ortholog(s) have GTPase activity                                                      | -1.36 | 1.62E-07 |
| <i>MRP8</i>        | Mitochondrial ribosomal protein                                                       | -1.37 | 2.90E-06 |
| <i>STT3</i>        | Putative oligosaccharyltransferase complex component                                  | -1.37 | 6.34E-07 |
| <i>BZZ1</i>        | SH3 domain protein involved in the regulation of actin polymerization                 | -1.39 | 2.23E-07 |
| <i>RNR1</i>        | Ribonucleotide reductase large subunit                                                | -1.39 | 1.73E-06 |
| <i>UBA4</i>        | Putative ubiquitin activating protein                                                 | -1.39 | 1.33E-11 |
| <i>C4_01280C_A</i> | Ortholog(s) have RNA binding activity                                                 | -1.39 | 3.79E-10 |
| <i>C1_14170W_A</i> | Ortholog(s) have ubiquitin-protein transferase activity                               | -1.40 | 1.73E-10 |
| <i>CR_02880W_A</i> | Protein of unknown function                                                           | -1.40 | 4.55E-06 |
| <i>SCT2</i>        | Putative glycerol-3-phosphate acyltransferase;                                        | -1.40 | 2.26E-08 |
| <i>MYO1</i>        | Component of actomyosin ring at neck of newly emerged bud                             | -1.40 | 1.59E-14 |
| <i>CHS5</i>        | Putative chitin biosynthesis protein                                                  | -1.42 | 5.94E-08 |
| <i>C2_00230W_A</i> | Ortholog(s) have arginyltransferase activity                                          | -1.42 | 1.84E-10 |
| <i>CR_00130C_A</i> | Protein with a pyridoxal phosphate-dependent transferase domain                       | -1.44 | 7.24E-06 |
| <i>SMP2</i>        | Putative Mg <sup>2+</sup> -dependent phosphatidate phosphatase                        | -1.45 | 4.40E-07 |
| <i>C1_07260C_A</i> | Ortholog(s) have DNA replication origin binding, single-stranded DNA binding activity | -1.46 | 1.16E-21 |
| <i>PMM1</i>        | Phosphomannomutase                                                                    | -1.46 | 7.69E-08 |
| <i>C1_01930W_A</i> | Protein of unknown function                                                           | -1.47 | 2.13E-06 |

|                    |                                                                                                                       |       |          |
|--------------------|-----------------------------------------------------------------------------------------------------------------------|-------|----------|
| <i>SET3</i>        | NAD-dependent histone deacetylase                                                                                     | -1.47 | 2.72E-11 |
| <i>BET2</i>        | Putative Type II geranylgeranyltransferase beta subunit                                                               | -1.48 | 5.13E-12 |
| <i>CR_02300C_A</i> | Protein with a Vps9 vacuolar protein sorting protein domain                                                           | -1.48 | 2.37E-13 |
| <i>PDS5</i>        | Putative protein with a predicted role in establishment and maintenance of sister chromatid condensation and cohesion | -1.49 | 1.04E-07 |
| <i>NCP1</i>        | NADPH-cytochrome P450 reductase                                                                                       | -1.49 | 1.30E-12 |
| <i>C3_06710W_A</i> | Protein of unknown function                                                                                           | -1.50 | 1.83E-18 |
| <i>FAS2</i>        | Alpha subunit of fatty-acid synthase                                                                                  | -1.50 | 4.22E-06 |
| <i>C3_04460W_A</i> | Ortholog(s) have role in positive regulation of TORC1 signaling and Seh1-associated complex                           | -1.50 | 2.82E-08 |
| <i>USO6</i>        | Putative vesicular transport protein                                                                                  | -1.50 | 1.83E-13 |
| <i>CDC3</i>        | Septin                                                                                                                | -1.51 | 8.19E-12 |
| <i>BTS1</i>        | Putative geranylgeranyl diphosphate synthase                                                                          | -1.51 | 8.03E-12 |
| <i>MAE1</i>        | Malic enzyme                                                                                                          | -1.51 | 3.13E-07 |
| <i>CYB5</i>        | Cytochrome b(5)                                                                                                       | -1.53 | 4.28E-06 |
| <i>CR_01280C_A</i> | Ortholog(s) have role in intracellular sterol transport                                                               | -1.54 | 5.24E-08 |
| <i>C1_03100W_A</i> | Putative lipid-binding protein                                                                                        | -1.55 | 9.48E-09 |
| <i>GTT11</i>       | Glutathione S-transferase                                                                                             | -1.55 | 7.07E-10 |
| <i>SVF1</i>        | Putative survival factor                                                                                              | -1.55 | 1.49E-11 |
| <i>C6_02680W_A</i> | Ortholog(s) have SNAP receptor activity                                                                               | -1.56 | 3.17E-08 |
| <i>C5_04350C_A</i> | Ortholog(s) have cell division site, cell tip, cytosol, nucleus localization                                          | -1.56 | 2.51E-12 |
| <i>C1_06700W_A</i> | SH3-domain protein                                                                                                    | -1.56 | 2.23E-07 |
| <i>ECM33</i>       | GPI-anchored cell wall protein                                                                                        | -1.57 | 1.85E-08 |
| <i>DYN1</i>        | Dynein heavy chain                                                                                                    | -1.57 | 4.37E-19 |
| <i>PMT2</i>        | Protein mannosyltransferase (PMT)                                                                                     | -1.57 | 1.26E-08 |
| <i>C5_04330W_A</i> | Putative adhesin-like protein                                                                                         | -1.57 | 2.36E-06 |
| <i>C4_06990W_A</i> | Possible mannosyltransferase                                                                                          | -1.59 | 4.86E-14 |
| <i>PGA53</i>       | GPI-anchored cell surface protein of unknown function                                                                 | -1.59 | 1.41E-07 |
| <i>YKE2</i>        | Possible heterohexameric Gim/prefoldin protein complex subunit                                                        | -1.60 | 1.48E-06 |
| <i>PRN4</i>        | Protein with similarity to pirins                                                                                     | -1.60 | 3.43E-06 |
| <i>C4_00710W_A</i> | Has domain(s) with predicted ATP binding activity                                                                     | -1.60 | 1.91E-08 |
| <i>C6_01950C_A</i> | Protein of unknown function                                                                                           | -1.61 | 1.44E-07 |
| <i>C1_07050C_A</i> | Ortholog(s) have ATP-dependent 5'-3' DNA helicase activity                                                            | -1.61 | 1.09E-11 |
| <i>C1_09220W_A</i> | Predicted MFS family membrane transporter                                                                             | -1.63 | 1.03E-09 |
| <i>RAD50</i>       | Putative DNA double-strand break repair factor                                                                        | -1.64 | 1.94E-11 |
| <i>CDC11</i>       | Septin                                                                                                                | -1.65 | 4.36E-06 |
| <i>C3_03370C_A</i> | Protein of unknown function                                                                                           | -1.67 | 7.02E-10 |
| <i>C6_02490C_A</i> | Protein of unknown function                                                                                           | -1.68 | 5.17E-10 |
| <i>PGI1</i>        | Glucose-6-phosphate isomerase                                                                                         | -1.68 | 4.50E-06 |
| <i>CR_06270W_A</i> | Predicted protein of unknown function                                                                                 | -1.69 | 1.81E-06 |

|                    |                                                                                               |       |          |
|--------------------|-----------------------------------------------------------------------------------------------|-------|----------|
| <i>ENO1</i>        | Enolase                                                                                       | -1.69 | 7.99E-06 |
| <i>C6_02650C_A</i> | Predicted membrane transporter                                                                | -1.69 | 1.97E-10 |
| <i>C2_08620W_A</i> | Protein of unknown function                                                                   | -1.71 | 1.09E-09 |
| <i>CR_00290W_A</i> | Ortholog of <i>S. cerevisiae</i> Rts3; a component of the protein phosphatase type 2A complex | -1.71 | 1.53E-12 |
| <i>MON2</i>        | Peripheral membrane protein                                                                   | -1.72 | 1.03E-10 |
| <i>CLN3</i>        | G1 cyclin                                                                                     | -1.73 | 4.62E-07 |
| <i>SEC61</i>       | ER protein-translocation complex subunit                                                      | -1.73 | 7.05E-06 |
| <i>C1_11120C_A</i> | Protein similar to <i>S. cerevisiae</i> Gvp36p                                                | -1.74 | 7.21E-20 |
| <i>REV3</i>        | Ortholog(s) have DNA-directed DNA polymerase activity                                         | -1.74 | 7.15E-11 |
| <i>CDC12</i>       | Septin                                                                                        | -1.75 | 2.88E-11 |
| <i>FBA1</i>        | Fructose-bisphosphate aldolase                                                                | -1.76 | 1.55E-09 |
| <i>KRE5</i>        | UDP-glucose:glycoprotein glucosyltransferase                                                  | -1.77 | 8.50E-08 |
| <i>EXG2</i>        | GPI-anchored cell wall protein                                                                | -1.78 | 3.25E-09 |
| <i>C7_02850W_A</i> | Ortholog of <i>Candida albicans</i> WO-1 : CAWG_05627                                         | -1.78 | 1.26E-12 |
| <i>SEC23</i>       | Putative GTPase-activating protein                                                            | -1.78 | 4.88E-08 |
| <i>C1_02780W_A</i> | Predicted diene lactone hydrolase domain                                                      | -1.79 | 1.24E-08 |
| <i>FCY2</i>        | Purine-cytosine permease of pyrimidine salvage                                                | -1.82 | 2.03E-07 |
| <i>C4_05250W_A</i> | Putative ubiquitin-protein ligase                                                             | -1.83 | 2.58E-09 |
| <i>C5_03490C_A</i> | Stationary phase enriched protein                                                             | -1.83 | 8.07E-17 |
| <i>AGO1</i>        | Putative Argonaute protein                                                                    | -1.83 | 2.64E-06 |
| <i>C1_11250W_A</i> | Microtubule-binding protein                                                                   | -1.84 | 6.83E-15 |
| <i>C5_02520W_A</i> | Protein of unknown function                                                                   | -1.85 | 1.94E-11 |
| <i>MTS1</i>        | Sphingolipid C9-methyltransferase                                                             | -1.85 | 7.43E-12 |
| <i>C1_09130W_A</i> | Protein of unknown function                                                                   | -1.86 | 3.11E-09 |
| <i>PMI1</i>        | Phosphomannose isomerase                                                                      | -1.87 | 2.84E-07 |
| <i>ACB1</i>        | Protein similar to a region of acyl-coenzyme-A-binding protein                                | -1.88 | 2.34E-06 |
| <i>PMT4</i>        | Protein mannosyltransferase                                                                   | -1.89 | 2.35E-07 |
| <i>NAT4</i>        | Putative histone acetyltransferase                                                            | -1.90 | 1.69E-10 |
| <i>STE13</i>       | Putative pheromone-processing dipeptidyl aminopeptidase                                       | -1.92 | 8.23E-16 |
| <i>CR_09330C_A</i> | Protein with a Staphylococcal nuclease domain                                                 | -1.93 | 1.40E-11 |
| <i>C5_02850W_A</i> | H/ACA box small nucleolar RNA (snoRNA)                                                        | -1.94 | 5.62E-08 |
| <i>C2_02220C_A</i> | Protein of unknown function                                                                   | -1.94 | 3.76E-07 |
| <i>TPM2</i>        | Putative tropomyosin isoform 2                                                                | -1.95 | 2.44E-09 |
| <i>PSD2</i>        | Ortholog(s) have phosphatidylserine decarboxylase activity                                    | -1.95 | 3.88E-22 |
| <i>TPK2</i>        | cAMP-dependent protein kinase catalytic subunit                                               | -1.96 | 8.11E-11 |
| <i>DPM1</i>        | Dolichol-phosphate mannose synthase catalytic subunit                                         | -1.98 | 2.55E-11 |
| <i>SSO2</i>        | Plasma membrane t-SNARE                                                                       | -1.98 | 3.53E-30 |
| <i>C1_04470C_A</i> | Protein of unknown function                                                                   | -2.00 | 1.35E-10 |
| <i>INN1</i>        | Protein with similarity to <i>S. cerevisiae</i> Inn1p                                         | -2.02 | 1.71E-29 |
| <i>PST3</i>        | Flavodoxin-like protein                                                                       | -2.02 | 1.62E-06 |
| <i>CDC19</i>       | Pyruvate kinase                                                                               | -2.04 | 1.43E-09 |

|                    |                                                                                                 |       |          |
|--------------------|-------------------------------------------------------------------------------------------------|-------|----------|
| <i>ERG11</i>       | Lanosterol 14-alpha-demethylase                                                                 | -2.04 | 1.72E-07 |
| <i>DAP1</i>        | Similar to mammalian membrane-associated progesterone receptors involved in DNA damage response | -2.08 | 7.04E-21 |
| <i>C2_07220W_A</i> | Putative 20S proteasome assembly protein                                                        | -2.10 | 3.22E-11 |
| <i>GST3</i>        | Glutathione S-transferase                                                                       | -2.11 | 7.62E-06 |
| <i>YVC1</i>        | Putative vacuolar cation channel shock                                                          | -2.13 | 1.40E-14 |
| <i>CEK1</i>        | ERK-family protein kinase                                                                       | -2.14 | 9.93E-15 |
| <i>C7_01390W_A</i> | Protein of unknown function                                                                     | -2.16 | 2.02E-07 |
| <i>CRL1</i>        | Predicted GTPase of RHO family                                                                  | -2.16 | 2.30E-24 |
| <i>ERG2</i>        | C-8 sterol isomerase                                                                            | -2.18 | 7.43E-12 |
| <i>CR_09040W_A</i> | Protein of unknown function                                                                     | -2.18 | 5.37E-08 |
| <i>GND1</i>        | 6-phosphogluconate dehydrogenase                                                                | -2.19 | 2.01E-06 |
| <i>C3_04420W_A</i> | Ortholog of <i>S. cerevisiae</i> Hul4                                                           | -2.19 | 9.81E-12 |
| <i>SLD1</i>        | Sphingolipid delta-8 desaturase                                                                 | -2.20 | 1.06E-17 |
| <i>MSC7</i>        | <i>S. cerevisiae</i> ortholog Mcs7                                                              | -2.23 | 8.80E-52 |
| <i>NIP100</i>      | p150 subunit of dynactin                                                                        | -2.25 | 6.27E-12 |
| <i>C3_04740C_A</i> | Ortholog(s) have DNA topoisomerase type I activity                                              | -2.26 | 1.94E-11 |
| <i>C2_09810C_A</i> | Protein with predicted peptidase domains                                                        | -2.27 | 1.69E-07 |
| <i>CR_04870C_A</i> | Trimethylaminobutyraldehyde dehydrogenase                                                       | -2.27 | 3.11E-09 |
| <i>MNN12</i>       | Predicted alpha-1,3-mannosyltransferase                                                         | -2.27 | 1.01E-09 |
| <i>SOD4</i>        | Cu-containing superoxide dismutase                                                              | -2.30 | 2.10E-08 |
| <i>MLC1</i>        | Microtubule-dependent localized protein                                                         | -2.30 | 5.78E-18 |
| <i>GAL4</i>        | Zn(II)2Cys6 transcription factor                                                                | -2.31 | 3.58E-13 |
| <i>GFA1</i>        | Glucosamine-6-phosphate synthase                                                                | -2.31 | 1.18E-13 |
| <i>LAP41</i>       | Putative aminopeptidase yscI precursor                                                          | -2.31 | 6.47E-11 |
| <i>C5_01070C_A</i> | Protein of unknown function                                                                     | -2.34 | 6.20E-08 |
| <i>C1_11790W_A</i> | Ortholog(s) have thymidylate kinase activity                                                    | -2.36 | 7.23E-16 |
| <i>ZWF1</i>        | Glucose-6-phosphate dehydrogenase                                                               | -2.36 | 2.18E-08 |
| <i>ERG5</i>        | Putative C-22 sterol desaturase                                                                 | -2.37 | 3.22E-11 |
| <i>C4_00860C_A</i> | Protein of unknown function                                                                     | -2.38 | 4.82E-11 |
| <i>C1_09980C_A</i> | Ortholog(s) have acylglycerol lipase activity                                                   | -2.41 | 1.63E-09 |
| <i>ERG27</i>       | 3-Keto sterol reductase of ergosterol biosynthesis                                              | -2.42 | 5.26E-14 |
| <i>PGA54</i>       | GPI-anchored protein                                                                            | -2.43 | 1.37E-10 |
| <i>CHS8</i>        | Chitin synthase                                                                                 | -2.43 | 4.32E-19 |
| <i>CR_04770C_A</i> | Ortholog of <i>C. dubliniensis</i> CD36 : Cd36_30140                                            | -2.43 | 3.73E-18 |
| <i>CHS2</i>        | Chitin synthase                                                                                 | -2.46 | 2.51E-41 |
| <i>C6_03320W_A</i> | Stationary phase enriched protein                                                               | -2.47 | 1.43E-06 |
| <i>C1_04580C_A</i> | Ortholog of Rmd6 involved in <i>S. cerevisiae</i> sporulation                                   | -2.48 | 1.05E-19 |
| <i>CR_09070C_A</i> | Protein of unknown function                                                                     | -2.49 | 5.32E-17 |
| <i>ERG10</i>       | Acetyl-CoA acetyltransferase                                                                    | -2.49 | 1.94E-11 |
| <i>C1_11730W_A</i> | Protein with SEL-1 like protein domain                                                          | -2.50 | 3.63E-25 |
| <i>C1_11720W_A</i> | Ortholog of <i>Candida albicans</i> WO-1 : CAWG_00265                                           | -2.51 | 7.55E-10 |
| <i>UPC2</i>        | Zn2-Cys6 transcript factor                                                                      | -2.55 | 3.81E-41 |

|                    |                                                                |       |          |
|--------------------|----------------------------------------------------------------|-------|----------|
| <i>C3_06670C_A</i> | Protein of unknown function                                    | -2.55 | 2.39E-06 |
| <i>C4_01860C_A</i> | Possible Golgi membrane protein                                | -2.56 | 1.24E-11 |
| <i>CR_04120C_A</i> | Ortholog(s) have DNA-dependent ATPase activity                 | -2.61 | 1.81E-17 |
| <i>C1_11260C_A</i> | Putative adhesin-like protein                                  | -2.66 | 2.18E-14 |
| <i>ERG1</i>        | Squalene epoxidase                                             | -2.68 | 8.42E-31 |
| <i>C5_04260W_A</i> | Has domain(s) with predicted RNA binding                       | -2.68 | 2.26E-08 |
| <i>ERG26</i>       | C-3 sterol dehydrogenase                                       | -2.68 | 8.72E-20 |
| <i>IHD1</i>        | GPI-anchored protein                                           | -2.75 | 1.98E-06 |
| <i>C6_02200C_A</i> | Protein of unknown function                                    | -2.75 | 1.83E-07 |
| <i>CHO1</i>        | Putative phosphatidylserine synthase                           | -2.80 | 1.92E-15 |
| <i>PGA6</i>        | GPI-anchored cell wall adhesin-like protein                    | -2.81 | 3.29E-09 |
| <i>C7_02260W_A</i> | Ortholog of <i>C. parapsilosis</i> CDC317                      | -2.85 | 1.13E-06 |
| <i>C1_13490C_A</i> | Ortholog(s) have role in cellular calcium ion homeostasis      | -2.90 | 1.74E-35 |
| <i>LDG3</i>        | Putative LDG family protein                                    | -2.90 | 3.08E-06 |
| <i>ECM331</i>      | GPI-anchored protein                                           | -2.93 | 2.62E-11 |
| <i>C2_02910W_A</i> | Protein of unknown function                                    | -3.03 | 6.12E-12 |
| <i>BMT7</i>        | Beta-mannosyltransferase                                       | -3.04 | 3.11E-13 |
| <i>C6_03260W_A</i> | Putative ribonuclease H1                                       | -3.06 | 1.15E-20 |
| <i>RBT4</i>        | Pry family protein                                             | -3.10 | 1.73E-11 |
| <i>ERG4</i>        | Protein similar to sterol C-24 reductase                       | -3.10 | 1.64E-11 |
| <i>DAG7</i>        | Secretory protein                                              | -3.19 | 1.06E-09 |
| <i>C6_02100W_A</i> | Secreted protein                                               | -3.21 | 8.98E-09 |
| <i>ERG24</i>       | C-14 sterol reductase                                          | -3.25 | 3.37E-29 |
| <i>IPK2</i>        | Putative inositol polyphosphate multikinase                    | -3.46 | 2.13E-39 |
| <i>C7_03310W_A</i> | Protein of unknown function                                    | -3.59 | 2.59E-10 |
| <i>RBR1</i>        | Glycosylphosphatidylinositol (GPI)-anchored cell wall protein  | -3.60 | 2.87E-12 |
| <i>ERG6</i>        | Delta(24)-sterol C-methyltransferase                           | -3.70 | 1.37E-25 |
| <i>DDR48</i>       | Immunogenic stress-associated protein                          | -3.78 | 1.95E-14 |
| <i>C1_04590W_A</i> | Protein of unknown function                                    | -3.79 | 2.46E-29 |
| <i>HWP1</i>        | Hyphal cell wall protein                                       | -4.10 | 7.81E-10 |
| <i>C3_06660C_A</i> | Ortholog of <i>C. dubliniensis</i> CD36 : Cd36_86630           | -4.16 | 3.09E-10 |
| <i>PGA45</i>       | Putative GPI-anchored cell wall protein                        | -4.19 | 2.22E-13 |
| <i>C2_10160W_A</i> | Secreted protein                                               | -4.45 | 2.94E-28 |
| <i>PGA23</i>       | Putative GPI-anchored protein of unknown function              | -4.52 | 3.16E-23 |
| <i>CRH11</i>       | GPI-anchored cell wall transglycosylase                        | -4.67 | 2.00E-30 |
| <i>MRV8</i>        | Protein of unknown function                                    | -5.46 | 4.10E-22 |
| <i>PGA13</i>       | GPI-anchored cell wall protein involved in cell wall synthesis | -5.67 | 2.51E-41 |
| <i>C3_01540W_A</i> | Plasma-membrane-localized protein                              | -6.68 | 5.72E-43 |

**Supplementary Table S6: Gene expression data;** Significantly upregulated/downregulated genes in *C. albicans* treated with C12AHL compared to fluconazole only treated samples. The genes that are known to be associated with antimicrobial sensitivity/resistance are shaded in light blue (adjusted  $p$ -value <  $1e^{-5}$ ).

| Name               | annotation                                                                                   | log2 Fold Change | Adjusted P value |
|--------------------|----------------------------------------------------------------------------------------------|------------------|------------------|
| <i>JEN2</i>        | Dicarboxylic acid transporter                                                                | 5.30             | 9.71E-47         |
| <i>ATX1</i>        | Putative cytosolic copper metallochaperone                                                   | 4.96             | 4.99E-48         |
| <i>RME1</i>        | Zinc finger protein                                                                          | 3.94             | 2.76E-27         |
| <i>CRP1</i>        | Copper transporter                                                                           | 3.84             | 6.55E-26         |
| <i>HSP30</i>       | Putative heat shock protein                                                                  | 3.77             | 4.01E-14         |
| <i>IFE2</i>        | Putative alcohol dehydrogenase                                                               | 3.61             | 7.29E-14         |
| <i>OPT3</i>        | Oligopeptide transporter                                                                     | 3.59             | 2.19E-30         |
| <i>ADH3</i>        | Putative NAD-dependent (R,R)-butanediol dehydrogenase                                        | 3.51             | 3.26E-10         |
| <i>C1_11320C_A</i> | Protein of unknown function                                                                  | 3.50             | 2.29E-18         |
| <i>HSP104</i>      | Heat-shock protein                                                                           | 3.41             | 5.31E-16         |
| <i>C5_04980W_A</i> | Putative adhesin-like protein                                                                | 3.40             | 8.25E-17         |
| <i>PHO84</i>       | High-affinity phosphate transporter                                                          | 3.38             | 3.55E-11         |
| <i>FCY21</i>       | High affinity, high capacity, hypoxanthine-adenine-guanine-cytosine/H <sup>+</sup> symporter | 3.33             | 5.32E-17         |
| <i>HSP78</i>       | Heat-shock protein                                                                           | 3.32             | 4.14E-20         |
| <i>HNM3</i>        | Putative transporter                                                                         | 3.29             | 5.02E-12         |
| <i>TPO3</i>        | Putative polyamine transporter                                                               | 3.28             | 5.64E-19         |
| <i>CDR4</i>        | Putative ABC transporter superfamily                                                         | 3.19             | 3.03E-40         |
| <i>UGT51C1</i>     | UDP-glucose: sterol glucosyltransferase                                                      | 3.03             | 1.65E-38         |
| <i>C7_03560W_A</i> | Protein of unknown function                                                                  | 3.02             | 1.07E-28         |
| <i>ZRT2</i>        | Zinc transporter                                                                             | 3.02             | 3.64E-15         |
| <i>C7_00350C_A</i> | Protein of unknown function                                                                  | 3.02             | 2.71E-10         |
| <i>C4_07140W_A</i> | Predicted mitochondrial intermembrane space protein                                          | 2.94             | 1.58E-19         |
| <i>CTN1</i>        | Carnitine acetyl transferase                                                                 | 2.90             | 6.21E-11         |
| <i>SSA2</i>        | HSP70 family chaperone                                                                       | 2.86             | 2.44E-09         |
| <i>CR_08270W_A</i> | Protein of unknown function                                                                  | 2.84             | 1.35E-06         |
| <i>GCV2</i>        | Glycine decarboxylase P subunit                                                              | 2.84             | 2.36E-10         |
| <i>ALP1</i>        | Cystine transporter                                                                          | 2.80             | 6.01E-12         |
| <i>HSP21</i>       | Small heat shock protein                                                                     | 2.72             | 2.65E-08         |
| <i>FMP45</i>       | Predicted membrane protein induced during mating                                             | 2.68             | 5.50E-08         |
| <i>DLD1</i>        | Putative D-lactate dehydrogenase                                                             | 2.60             | 3.81E-12         |
| <i>CAN1</i>        | Basic amino acid permease                                                                    | 2.59             | 3.90E-08         |
| <i>C6_00810C_A</i> | Protein of unknown function                                                                  | 2.59             | 7.90E-09         |
| <i>SIT1</i>        | Transporter of ferrichrome siderophores                                                      | 2.57             | 4.54E-08         |
| <i>C1_07160C_A</i> | Protein conserved among the CTG-clade                                                        | 2.51             | 6.56E-08         |
| <i>C1_08350C_A</i> | Ortholog of <i>C. dubliniensis</i> CD36 : Cd36_02630                                         | 2.44             | 8.75E-15         |
| <i>RBE1</i>        | Pry family cell wall protein                                                                 | 2.37             | 1.16E-06         |
| <i>C2_00760C_A</i> | Protein of unknown function                                                                  | 2.29             | 1.47E-11         |
| <i>AQY1</i>        | Aquaporin water channel                                                                      | 2.27             | 8.18E-09         |
| <i>GIT3</i>        | Glycerophosphocholine permease                                                               | 2.25             | 9.75E-12         |
| <i>CR_08880C_A</i> | Protein of unknown function                                                                  | 2.24             | 1.67E-12         |
| <i>C7_01170C_A</i> | Putative oxidoreductase                                                                      | 2.23             | 2.39E-06         |
| <i>C2_03110W_A</i> | Protein of unknown function                                                                  | 2.23             | 7.53E-10         |
| <i>C7_04090C_A</i> | Predicted mitochondrial cardiolipin-specific phospholipase                                   | 2.22             | 3.03E-10         |
| <i>ARG1</i>        | Argininosuccinate synthase                                                                   | 2.18             | 1.91E-07         |
| <i>CTA4</i>        | Zn(II)2Cys6 transcription factor                                                             | 2.16             | 2.65E-10         |



|                      |                                                                                       |      |          |
|----------------------|---------------------------------------------------------------------------------------|------|----------|
|                      | Ortholog(s) have protein binding, bridging, ubiquitin protein ligase binding activity | 2.15 | 1.45E-08 |
| <i>RPS27A</i>        | Ribosomal protein S27                                                                 | 2.13 | 8.62E-09 |
| <i>GNP1</i>          | Similar to asparagine and glutamine permease                                          | 2.11 | 4.72E-14 |
| <i>MUP1</i>          | Putative high affinity methionine permease                                            | 2.09 | 1.06E-06 |
| <i>SIS1</i>          | Putative Type II HSP40 co-chaperone                                                   | 2.09 | 1.49E-07 |
| <i>CDR11</i>         | Putative transporter of PDR subfamily of ABC family                                   | 2.09 | 1.23E-16 |
| <i>C6_00290W_A</i>   | Protein of unknown function                                                           | 2.08 | 1.44E-13 |
| <i>GOR1</i>          | Ortholog(s) have glyoxylate reductase activity                                        | 2.06 | 2.31E-08 |
| <i>C7_00770W_A</i>   | Protein of unknown function                                                           | 2.05 | 3.57E-08 |
| <i>CAN3</i>          | Predicted amino acid transmembrane transporter                                        | 2.05 | 1.34E-12 |
| <i>SNQ2</i>          | Protein similar to <i>S. cerevisiae</i> Snq2p transporter                             | 2.04 | 2.27E-12 |
| <i>PHO87</i>         | Putative phosphate permease                                                           | 2.02 | 1.24E-08 |
| <i>SSC1</i>          | Heat shock protein                                                                    | 2.01 | 8.61E-17 |
| <i>CPH2</i>          | Myc-bHLH transcription factor                                                         | 1.96 | 1.30E-15 |
| <i>C2_08100W_A</i>   | Mitochondrial apoptosis-inducing factor                                               | 1.96 | 1.92E-06 |
| <i>ALR1</i>          | Putative transporter of divalent cations                                              | 1.95 | 9.50E-06 |
| <i>CR_08420W_A</i>   | Putative DnaJ-like heat shock/chaperone                                               | 1.93 | 6.87E-06 |
| <i>C1_13820C_A</i>   | Protein of unknown function                                                           | 1.92 | 8.60E-08 |
| <i>C7_00880C_A</i>   | Protein of unknown function                                                           | 1.91 | 2.35E-09 |
| <i>COX15</i>         | Cytochrome oxidase assembly protein                                                   | 1.91 | 8.42E-09 |
| <i>GIT2</i>          | Putative glycerophosphoinositol permease                                              | 1.90 | 2.56E-08 |
| <i>C3_01260C_A</i>   | Putative adhesin-like protein                                                         | 1.89 | 2.31E-08 |
| <i>C4_03370C_A</i>   | Ortholog of <i>C. parapsilosis</i> CDC317 : CPAR2_403360                              | 1.88 | 7.31E-07 |
| <i>C1_01130W_A</i>   | Putative ubiquitin ligase complex component                                           | 1.88 | 5.64E-19 |
| <i>GRF10</i>         | Putative homeodomain transcription factor                                             | 1.86 | 8.93E-08 |
| <i>PUT1</i>          | Putative proline oxidase                                                              | 1.85 | 4.85E-07 |
| <i>CAL0000191350</i> | Ortholog(s) have ATP binding, DNA replication origin binding activity                 | 1.84 | 2.14E-12 |
| <i>NDT80</i>         | Ortholog of Ndt80                                                                     | 1.83 | 2.15E-09 |
| <i>SUL2</i>          | Putative sulfate transporter                                                          | 1.83 | 1.20E-08 |
| <i>C7_03590C_A</i>   | Putative member of the multi-drug and toxin extrusion (MATE) family                   | 1.82 | 4.86E-06 |
| <i>ITR1</i>          | MFS inositol transporter                                                              | 1.80 | 3.55E-09 |
| <i>DED1</i>          | Predicted ATP-dependent RNA helicase                                                  | 1.79 | 3.07E-07 |
| <i>PTR22</i>         | Oligopeptide transporter involved in uptake of di-/tripeptides                        | 1.78 | 1.88E-06 |
| <i>C6_03200W_A</i>   | Ortholog of <i>C. dubliniensis</i> CD36: Cd36_63860                                   | 1.78 | 2.34E-12 |
| <i>ARD</i>           | D-arabitol dehydrogenase                                                              | 1.77 | 3.88E-16 |
| <i>C4_05900C_A</i>   | Protein of unknown function                                                           | 1.77 | 6.46E-12 |
| <i>STI1</i>          | Protein that interacts with Cdc37 and Crk1 in two-hybrid                              | 1.77 | 1.19E-06 |
| <i>PLB3</i>          | GPI-anchored cell surface phospholipase B                                             | 1.77 | 6.28E-07 |
| <i>ALS7</i>          | ALS family protein                                                                    | 1.75 | 6.00E-22 |
| <i>CR_07170W_A</i>   | Possible dehydrogenase                                                                | 1.73 | 1.17E-08 |
| <i>HSP90</i>         | Essential chaperone                                                                   | 1.72 | 6.74E-07 |
| <i>C5_02590C_A</i>   | Putative mitochondrial membrane protein                                               | 1.71 | 2.26E-06 |
| <i>MET2</i>          | Homoserine acetyltransferase                                                          | 1.70 | 1.71E-06 |
| <i>HSP60</i>         | Heat shock protein                                                                    | 1.70 | 1.49E-12 |
| <i>YIM1</i>          | Protein similar to protease of mitochondrial inner membrane                           | 1.69 | 9.97E-07 |
| <i>KGD1</i>          | Putative 2-oxoglutarate dehydrogenase                                                 | 1.68 | 1.23E-06 |
| <i>ROA1</i>          | Putative PDR-subfamily ABC transporter                                                | 1.62 | 2.65E-07 |

|                    |                                                                      |      |          |
|--------------------|----------------------------------------------------------------------|------|----------|
| <i>PDE2</i>        | High affinity cyclic nucleotide phosphodiesterase                    | 1.62 | 1.52E-08 |
| <i>HAL9</i>        | Putative Zn(II)2Cys6 transcription factor                            | 1.61 | 3.46E-11 |
| <i>C3_00840C_A</i> | Ortholog(s) have mitochondrion localization                          | 1.60 | 8.66E-06 |
| <i>MDJ1</i>        | Putative member of the HSP40 (DnaJ) family of chaperones             | 1.59 | 3.15E-06 |
| <i>DCK1</i>        | Putative guanine nucleotide exchange factor                          | 1.57 | 9.29E-06 |
| <i>GAP5</i>        | General amino acid permease                                          | 1.57 | 1.27E-06 |
| <i>CR_03120W_A</i> | Ortholog of <i>S. cerevisiae</i> Mpm1                                | 1.57 | 1.62E-13 |
| <i>C1_05520W_A</i> | Protein of unknown function                                          | 1.56 | 2.73E-06 |
| <i>RNR3</i>        | Putative ribonucleotide reductase large subunit                      | 1.56 | 5.67E-09 |
| <i>MNN22</i>       | Alpha-1,2-mannosyltransferase                                        | 1.56 | 5.89E-11 |
| <i>C1_08520C_A</i> | Ortholog(s) have structural constituent of ribosome activity         | 1.55 | 1.38E-10 |
| <i>RIM101</i>      | Transcription factor                                                 | 1.54 | 3.88E-08 |
| <i>C2_10090C_A</i> | Ortholog(s) have mitochondrion localization                          | 1.54 | 5.89E-08 |
| <i>RIM2</i>        | Putative mitochondrial carrier protein                               | 1.54 | 4.81E-07 |
| <i>ROD1</i>        | Protein similar to <i>S. cerevisiae</i> Rod1                         | 1.52 | 9.08E-06 |
| <i>C6_01620W_A</i> | RING/FYVE/PHD zinc finger protein                                    | 1.52 | 5.36E-11 |
| <i>C6_03440W_A</i> | Ortholog(s) have rRNA binding activity                               | 1.52 | 7.14E-09 |
| <i>SSY1</i>        | Amino acid sensor                                                    | 1.50 | 1.12E-06 |
| <i>TUF1</i>        | Translation elongation factor TU                                     | 1.49 | 5.38E-07 |
| <i>ZCF29</i>       | Zn(II)2Cys6 transcription factor                                     | 1.49 | 3.87E-11 |
| <i>MIF2</i>        | Centromere-associated protein                                        | 1.48 | 3.07E-20 |
| <i>CR_03940W_A</i> | Putative rRNA processing protein                                     | 1.47 | 3.18E-07 |
| <i>C5_00570W_A</i> | Putative aminophospholipid translocase (flippase)                    | 1.46 | 8.94E-06 |
| <i>TIM23</i>       | Protein involved in mitochondrial matrix protein import              | 1.44 | 3.55E-11 |
| <i>HRR25</i>       | Predicted protein serine/threonine kinase                            | 1.43 | 1.41E-06 |
| <i>C2_04790C_A</i> | Ortholog(s) have structural constituent of ribosome activity         | 1.40 | 1.16E-07 |
| <i>C5_02740W_A</i> | Ortholog(s) have oxidoreductase activity                             | 1.40 | 3.97E-11 |
| <i>C2_02180W_A</i> | Ortholog of <i>S. cerevisiae</i> Zrt3                                | 1.39 | 5.74E-11 |
| <i>MGE1</i>        | Putative mitochondrial matrix cochaperone                            | 1.38 | 4.07E-06 |
| <i>RSN1</i>        | Protein of unknown function                                          | 1.38 | 1.10E-09 |
| <i>C1_14190C_A</i> | Protein phosphatase inhibitor                                        | 1.37 | 3.89E-06 |
| <i>C1_01150C_A</i> | Ortholog(s) have tRNA methyltransferase activity                     | 1.37 | 2.44E-06 |
| <i>WSC1</i>        | Putative cell wall component                                         | 1.35 | 1.52E-08 |
| <i>ISW2</i>        | Ortholog of <i>S. cerevisiae</i> Isw2                                | 1.35 | 1.37E-06 |
| <i>RIM9</i>        | Protein required for alkaline pH response                            | 1.33 | 2.29E-08 |
| <i>HIP1</i>        | Amino acid permeases                                                 | 1.33 | 8.59E-11 |
| <i>C3_01850W_A</i> | Ortholog(s) have structural constituent of ribosome activity         | 1.32 | 3.94E-06 |
| <i>CWC22</i>       | Predicted spliceosome-associated protein                             | 1.32 | 8.07E-10 |
| <i>C5_04050W_A</i> | Plasma membrane-localized protein of unknown function                | 1.30 | 2.88E-06 |
| <i>C4_03410W_A</i> | Ortholog(s) have structural constituent of ribosome activity         | 1.30 | 6.53E-10 |
| <i>MSW1</i>        | Protein similar to <i>S. cerevisiae</i> Msw1p                        | 1.30 | 3.88E-10 |
| <i>C1_06350W_A</i> | Protein of unknown function                                          | 1.27 | 4.81E-07 |
| <i>GIS2</i>        | Translational activator for mRNAs with internal ribosome entry sites | 1.27 | 2.88E-06 |
| <i>PTC8</i>        | Predicted type 2C protein phosphatase                                | 1.26 | 3.05E-06 |
| <i>CTA2</i>        | Putative transcription factor                                        | 1.25 | 6.22E-07 |
| <i>C2_03490C_A</i> | Ortholog of <i>C. dubliniensis</i> CD36 : Cd36_18230                 | 1.25 | 8.79E-08 |
| <i>MRPL10</i>      | Putative mitochondrial large subunit ribosomal protein               | 1.22 | 6.50E-06 |
| <i>SSU81</i>       | Predicted adaptor protein                                            | 1.21 | 1.37E-06 |



|                    |                                                                                             |       |          |
|--------------------|---------------------------------------------------------------------------------------------|-------|----------|
| <i>MNN23</i>       | Alpha-1,2-mannosyltransferase                                                               | 1.21  | 4.86E-06 |
| <i>C1_14090W_A</i> | Ortholog(s) have chaperone binding, unfolded protein binding activity                       | 1.21  | 2.02E-07 |
| <i>C5_00250C_A</i> | Protein with a predicted role in microtubule-related processes                              | 1.19  | 2.61E-06 |
| <i>MIA40</i>       | Predicted component of the mitochondrial intermembrane space import machinery               | 1.18  | 1.24E-06 |
| <i>FLO8</i>        | Transcription factor                                                                        | 1.16  | 3.40E-06 |
| <i>FGR15</i>       | Putative transcription factor with zinc finger DNA-binding motif                            | 1.16  | 8.13E-08 |
| <i>MIH1</i>        | Putative protein phosphatase of the PTP family (tyrosine-specific)                          | 1.14  | 7.23E-06 |
| <i>C7_03000C_A</i> | Ortholog(s) have structural constituent of ribosome activity                                | 1.14  | 1.46E-07 |
| <i>WHI3</i>        | Putative RNA binding protein                                                                | 1.13  | 6.19E-06 |
| <i>C1_14330W_A</i> | Ortholog(s) have tRNA-5-taurinomethyluridine 2-sulfurtransferase activity                   | 1.11  | 9.12E-06 |
| <i>ALS6</i>        | ALS family protein                                                                          | 1.10  | 1.42E-08 |
| <i>C2_07440C_A</i> | Ortholog(s) have sterol esterase activity                                                   | 1.10  | 9.29E-07 |
| <i>C1_05210C_A</i> | Protein of unknown function                                                                 | 1.09  | 1.52E-06 |
| <i>C7_01910C_A</i> | Similar to bacterial DnaJ                                                                   | 1.08  | 8.13E-08 |
| <i>ADA2</i>        | Zinc finger and homeodomain transcriptional coactivator                                     | 1.08  | 2.42E-06 |
| <i>YOR1</i>        | Protein similar to <i>S. cerevisiae</i> Yor1                                                | 1.03  | 2.98E-07 |
| <i>CR_03110W_A</i> | Ortholog(s) have role in mitochondrial translation                                          | 1.02  | 1.63E-06 |
| <i>C4_00910C_A</i> | Protein with similarity to mutator-like element (MULE) transposase                          | 1.01  | 6.12E-08 |
| <i>CR_10420W_A</i> | Protein with a mitochondrial distribution and morphology domain                             | 0.99  | 1.99E-06 |
| <i>C1_13880C_A</i> | C2H2 transcription factor                                                                   | 0.95  | 9.55E-06 |
| <i>C6_00390W_A</i> | Ortholog(s) have serine-tRNA ligase activity                                                | 0.90  | 4.48E-07 |
| <i>C4_03780C_A</i> | Putative mitochondrial membrane protein                                                     | 0.84  | 6.06E-06 |
| <i>AFG3</i>        | Similar to <i>S. cerevisiae</i> Afg3p                                                       | 0.81  | 2.26E-08 |
| <i>C2_00730C_A</i> | Ortholog of <i>C. dubliniensis</i> CD36 : Cd36_15670                                        | 0.80  | 2.51E-11 |
| <i>SWI6</i>        | Putative component of the MBF and SBF transcription complexes                               | 0.74  | 1.72E-07 |
| <i>WAR1</i>        | Zn(II)2Cys6 transcription factor                                                            | 0.74  | 1.63E-06 |
| <i>PDR6</i>        | Putative pleiotropic drug resistance regulatory protein 6                                   | 0.67  | 3.90E-07 |
| <i>ZCF9</i>        | Putative Zn(II)2Cys6 transcription factor                                                   | -0.59 | 1.73E-06 |
| <i>C5_03940C_A</i> | Putative multidrug resistance protein                                                       | -0.66 | 9.64E-07 |
| <i>C3_01510W_A</i> | Ortholog(s) have phosphatidate phosphatase activity                                         | -0.74 | 6.33E-06 |
| <i>VPS8</i>        | Putative vacuolar sorting protein                                                           | -0.76 | 5.73E-09 |
| <i>CR_01130W_A</i> | Ortholog(s) have role in positive regulation of TORC1 signaling and Seh1-associated complex | -0.80 | 4.39E-06 |
| <i>SEC34</i>       | Ortholog(s) have protein transporter activity and role in CVT pathway                       | -0.80 | 7.00E-06 |
| <i>RLM1</i>        | Putative transcription factor                                                               | -0.81 | 2.97E-06 |
| <i>APL5</i>        | Ortholog of <i>S. cerevisiae</i> and <i>S. pombe</i> Apl5                                   | -0.83 | 5.54E-06 |
| <i>CWH43</i>       | Putative sensor/transporter protein                                                         | -0.85 | 4.81E-06 |
| <i>PSD1</i>        | Phosphatidylserine decarboxylase                                                            | -0.86 | 2.91E-06 |
| <i>TAF60</i>       | Putative TFIID and SAGA complex subunit                                                     | -0.86 | 6.04E-06 |
| <i>PKH2</i>        | Putative serine/threonine protein kinase                                                    | -0.87 | 2.55E-06 |
| <i>C2_01490C_A</i> | Putative RNA polymerase transcription factor TFIIH core component                           | -0.87 | 2.11E-06 |
| <i>POM152</i>      | Putative nuclear pore membrane glycoprotein                                                 | -0.91 | 7.60E-07 |
| <i>C5_04320C_A</i> | RNI-like superfamily domain-containing protein                                              | -0.92 | 5.20E-06 |
| <i>C1_12740W_A</i> | Predicted cysteine proteinase domain                                                        | -0.95 | 5.88E-07 |
| <i>C5_01350W_A</i> | Ortholog(s) have role in ER-dependent peroxisome organization                               | -0.96 | 2.51E-06 |
| <i>C3_02080W_A</i> | Has domain(s) with predicted zinc ion binding activity                                      | -0.96 | 5.65E-07 |

|                    |                                                                                                |       |          |
|--------------------|------------------------------------------------------------------------------------------------|-------|----------|
| <i>C1_04780C_A</i> | Ortholog(s) have role in negative regulation of TORC1 signaling                                | -0.97 | 1.79E-11 |
| <i>RAD7</i>        | Protein similar to <i>S. cerevisiae</i> Rad7p                                                  | -0.98 | 1.35E-06 |
| <i>C3_02690C_A</i> | Ortholog(s) have dolichol kinase activity                                                      | -0.98 | 5.02E-06 |
| <i>VPS36</i>       | ESCRT II protein sorting complex subunit                                                       | -0.98 | 1.99E-06 |
| <i>C4_01790W_A</i> | Adapter protein for pexophagy and the cytoplasm-to-vacuole targeting (Cvt) pathway             | -0.99 | 1.12E-07 |
| <i>TEL1</i>        | Ortholog(s) have protein serine/threonine kinase activity                                      | -0.99 | 9.83E-11 |
| <i>SHE3</i>        | mRNA-binding protein                                                                           | -0.99 | 1.09E-06 |
| <i>CR_06470W_A</i> | Ortholog(s) have ubiquitin protein ligase activity                                             | -1.00 | 6.12E-06 |
| <i>C5_01290C_A</i> | Ortholog(s) have 2-octoprenyl-3-methyl-6-methoxy-1,4-benzoquinone hydroxylase activity         | -1.00 | 3.21E-06 |
| <i>ORC3</i>        | Protein similar to <i>S. cerevisiae</i> Orc3p                                                  | -1.01 | 1.20E-08 |
| <i>CR_08550W_A</i> | Ortholog(s) have fructose-2,6-bisphosphate 2-phosphatase activity                              | -1.02 | 2.80E-07 |
| <i>CAS4</i>        | RAM cell wall integrity signaling network protein                                              | -1.02 | 9.78E-08 |
| <i>C4_00380W_A</i> | Ortholog(s) have D-arabinose 1-dehydrogenase [NAD(P)+] activity                                | -1.02 | 1.72E-07 |
| <i>SMF3</i>        | Putative vacuolar iron transporter                                                             | -1.04 | 1.80E-07 |
| <i>C5_00750C_A</i> | Predicted protein tyrosine phosphatase                                                         | -1.04 | 3.34E-07 |
| <i>CR_05890C_A</i> | Ortholog(s) have acetyltransferase activator activity                                          | -1.05 | 8.35E-08 |
| <i>C4_06740C_A</i> | Ortholog(s) have protein binding, bridging activity                                            | -1.06 | 8.51E-07 |
| <i>C3_07230W_A</i> | Aminophospholipid translocase (flippase)                                                       | -1.06 | 2.88E-12 |
| <i>RTA2</i>        | Flippase                                                                                       | -1.06 | 9.25E-09 |
| <i>C7_04210C_A</i> | Protein similar to <i>Aspergillus</i> CYSK O-acetylserine sulfhydrylase                        | -1.08 | 3.29E-06 |
| <i>HEM2</i>        | Putative porphobilinogen synthase                                                              | -1.08 | 2.42E-07 |
| <i>SOL3</i>        | Putative 6-phosphogluconolactonase                                                             | -1.09 | 8.75E-06 |
| <i>MKC1</i>        | MAP kinase                                                                                     | -1.09 | 2.28E-07 |
| <i>C4_05800C_A</i> | Protein of unknown function                                                                    | -1.10 | 3.99E-06 |
| <i>ERV46</i>       | Putative ER-derived vesicle protein                                                            | -1.10 | 8.60E-08 |
| <i>PGA63</i>       | Component COPII vesicle coat                                                                   | -1.10 | 9.85E-07 |
| <i>C2_02020W_A</i> | Ortholog(s) have Lys48-specific deubiquitinase activity                                        | -1.11 | 1.12E-06 |
| <i>C1_04230W_A</i> | Ortholog(s) have ubiquitin binding activity                                                    | -1.12 | 4.50E-07 |
| <i>C5_01090C_A</i> | Planktonic growth-induced gene                                                                 | -1.12 | 7.69E-06 |
| <i>C4_06020C_A</i> | Ortholog(s) have DNA-directed DNA polymerase activity                                          | -1.13 | 3.61E-10 |
| <i>CR_09340W_A</i> | Ortholog(s) have ubiquitin conjugating enzyme activity                                         | -1.13 | 2.68E-07 |
| <i>C1_01210W_A</i> | Ortholog of <i>Candida tropicalis</i> MYA-3404 : CTRG_04422                                    | -1.13 | 8.11E-07 |
| <i>SSN8</i>        | Ortholog of <i>S. cerevisiae</i> Ssn8                                                          | -1.14 | 8.23E-09 |
| <i>C5_01940W_A</i> | Ortholog(s) have 2,5-diamino-6-ribitylamino-4(3H)-pyrimidinone 5'-phosphate deaminase activity | -1.15 | 2.62E-08 |
| <i>MUQ1</i>        | Putative choline phosphate cytidyltransferase/phosphoethanolamine cytidyltransferase           | -1.15 | 9.25E-09 |
| <i>PMT1</i>        | Protein mannosyltransferase                                                                    | -1.16 | 8.45E-06 |
| <i>SEN1</i>        | Putative helicase                                                                              | -1.16 | 1.44E-07 |
| <i>C4_06130W_A</i> | Ortholog(s) have tubulin binding activity                                                      | -1.16 | 1.23E-07 |
| <i>CR_08430W_A</i> | Protein similar to <i>S. cerevisiae</i> Vac14p                                                 | -1.18 | 1.89E-11 |
| <i>C7_00140C_A</i> | Ortholog(s) have cytosol, nucleus localization                                                 | -1.18 | 1.77E-10 |
| <i>CDC10</i>       | Septin                                                                                         | -1.18 | 7.05E-06 |
| <i>UBA4</i>        | Putative ubiquitin activating protein                                                          | -1.18 | 1.07E-08 |
| <i>C1_01300W_A</i> | Putative thioredoxin                                                                           | -1.18 | 1.58E-09 |

|                    |                                                                                                                                                                 |       |          |
|--------------------|-----------------------------------------------------------------------------------------------------------------------------------------------------------------|-------|----------|
| <i>C1_03330C_A</i> | Ortholog(s) have phosphatidylinositol-3,5-bisphosphate binding activity                                                                                         | -1.21 | 1.65E-15 |
| <i>ARO80</i>       | Zn(II)2Cys6 transcription factor                                                                                                                                | -1.22 | 1.75E-12 |
| <i>LSC1</i>        | Putative succinate-CoA ligase subunit                                                                                                                           | -1.23 | 1.16E-06 |
| <i>CYK3</i>        | Essential protein involved in cytokinesis                                                                                                                       | -1.23 | 1.46E-06 |
| <i>C1_02440C_A</i> | Ortholog(s) have thiol-dependent ubiquitin-specific protease activity                                                                                           | -1.23 | 1.35E-06 |
| <i>C5_02050W_A</i> | Ortholog(s) have role in Golgi to endosome transport, cell morphogenesis, cleistothecium development, conidium formation and endoplasmic reticulum organization | -1.23 | 5.38E-11 |
| <i>BET2</i>        | Putative Type II geranylgeranyltransferase beta subunit                                                                                                         | -1.23 | 1.16E-08 |
| <i>C2_07010W_A</i> | Predicted ER protein involved in ER-nucleus signaling                                                                                                           | -1.23 | 2.10E-10 |
| <i>CR_04080C_A</i> | Endoplasmic reticulum (ER) protein-translocation complex subunit                                                                                                | -1.24 | 4.96E-11 |
| <i>PFY1</i>        | Profilin; functional homolog of <i>S. cerevisiae</i> Pfy1                                                                                                       | -1.24 | 2.43E-06 |
| <i>RET2</i>        | Delta subunit of the coatomer complex (COPI)                                                                                                                    | -1.25 | 1.88E-06 |
| <i>MYO2</i>        | Class V myosin                                                                                                                                                  | -1.25 | 7.31E-07 |
| <i>SEC7</i>        | Putative guanine nucleotide exchange factor (GEF)                                                                                                               | -1.27 | 2.62E-11 |
| <i>C4_01280C_A</i> | Ortholog(s) have RNA binding activity                                                                                                                           | -1.27 | 1.52E-08 |
| <i>COQ6</i>        | Ortholog(s) have oxidoreductase activity                                                                                                                        | -1.28 | 3.81E-12 |
| <i>VPS1</i>        | Dynamamin-family GTPase-related protein                                                                                                                         | -1.28 | 1.19E-09 |
| <i>CCH1</i>        | Voltage-gated Ca <sup>2+</sup> channel of the high affinity calcium uptake system                                                                               | -1.29 | 2.60E-14 |
| <i>CHS7</i>        | Protein required for wild-type chitin synthase III activity                                                                                                     | -1.29 | 6.28E-10 |
| <i>KTR4</i>        | Mannosyltransferase                                                                                                                                             | -1.30 | 1.44E-07 |
| <i>IML2</i>        | Protein of unknown function                                                                                                                                     | -1.30 | 8.23E-09 |
| <i>VMA4</i>        | H <sup>+</sup> transporting ATPase E chain                                                                                                                      | -1.31 | 9.47E-06 |
| <i>TUB1</i>        | Alpha-tubulin                                                                                                                                                   | -1.32 | 1.16E-08 |
| <i>C1_01400C_A</i> | Ortholog(s) have sphingosine-1-phosphate phosphatase activity                                                                                                   | -1.33 | 2.00E-07 |
| <i>TIP120</i>      | Protein similar to human CAND1 (Cullin-Associated Nedd8-Dissociated) protein                                                                                    | -1.33 | 5.93E-07 |
| <i>C3_07770C_A</i> | Ortholog(s) have microtubule binding, protein homodimerization activity                                                                                         | -1.33 | 1.64E-10 |
| <i>C3_06750W_A</i> | Ortholog(s) have P-P-bond-hydrolysis-driven protein transmembrane transporter activity                                                                          | -1.34 | 1.94E-07 |
| <i>C3_04460W_A</i> | Ortholog(s) have role in positive regulation of TORC1 signaling                                                                                                 | -1.35 | 8.86E-07 |
| <i>RNR1</i>        | Ribonucleotide reductase large subunit                                                                                                                          | -1.35 | 3.71E-06 |
| <i>STT3</i>        | Putative oligosaccharyltransferase complex component                                                                                                            | -1.35 | 1.12E-06 |
| <i>MYO1</i>        | Component of actomyosin ring at neck of newly-emerged bud                                                                                                       | -1.35 | 1.62E-13 |
| <i>PDS5</i>        | Putative protein with a predicted role in establishment and maintenance of sister chromatid condensation and cohesion                                           | -1.36 | 1.59E-06 |
| <i>NPT1</i>        | Putative nicotinate phosphoribosyltransferase                                                                                                                   | -1.36 | 3.75E-13 |
| <i>RHO2</i>        | Ortholog(s) have GTPase activity                                                                                                                                | -1.37 | 1.44E-07 |
| <i>USO6</i>        | Putative vesicular transport protein                                                                                                                            | -1.37 | 2.59E-11 |
| <i>C6_00890W_A</i> | Ortholog(s) have cytoplasm localization                                                                                                                         | -1.38 | 7.22E-10 |
| <i>DOA1</i>        | WD repeat protein                                                                                                                                               | -1.38 | 1.34E-06 |
| <i>ERG7</i>        | 2,3-epoxysqualene-lanosterol cyclase (lanosterol synthase)                                                                                                      | -1.38 | 8.50E-07 |
| <i>PGA53</i>       | GPI-anchored cell surface protein of unknown function                                                                                                           | -1.40 | 4.71E-06 |
| <i>SEC13</i>       | Putative protein transport factor                                                                                                                               | -1.40 | 2.11E-08 |
| <i>C6_02680W_A</i> | Ortholog(s) have SNAP receptor activity                                                                                                                         | -1.40 | 8.34E-07 |
| <i>C1_02770W_A</i> | Protein of unknown function                                                                                                                                     | -1.40 | 2.43E-10 |
| <i>MPT5</i>        | Putative RNA-binding protein                                                                                                                                    | -1.40 | 1.11E-12 |

|                    |                                                                                       |       |          |
|--------------------|---------------------------------------------------------------------------------------|-------|----------|
| <i>C1_07050C_A</i> | Ortholog(s) have ATP-dependent 5'-3' DNA helicase activity                            | -1.41 | 4.26E-09 |
| <i>C1_09220W_A</i> | Predicted MFS family membrane transporter                                             | -1.41 | 1.90E-07 |
| <i>C2_05720C_A</i> | Putative oxysterol binding protein family                                             | -1.41 | 2.73E-16 |
| <i>DYN1</i>        | Dynein heavy chain                                                                    | -1.42 | 8.45E-16 |
| <i>C3_06710W_A</i> | Protein of unknown function                                                           | -1.43 | 7.44E-17 |
| <i>SRB1</i>        | Essential GDP-mannose pyrophosphorylase                                               | -1.43 | 7.34E-06 |
| <i>SMP2</i>        | Putative Mg <sup>2+</sup> -dependent phosphatidate phosphatase                        | -1.44 | 6.93E-07 |
| <i>C1_06700W_A</i> | SH3-domain protein                                                                    | -1.45 | 1.96E-06 |
| <i>C6_02490C_A</i> | Protein of unknown function                                                           | -1.46 | 1.01E-07 |
| <i>C1_07260C_A</i> | Ortholog(s) have DNA replication origin binding, single-stranded DNA binding activity | -1.46 | 1.23E-21 |
| <i>RAD50</i>       | Putative DNA double-strand break repair factor                                        | -1.46 | 2.94E-09 |
| <i>CHS5</i>        | Putative chitin biosynthesis protein                                                  | -1.46 | 2.47E-08 |
| <i>C1_03100W_A</i> | Putative lipid-binding protein                                                        | -1.46 | 7.05E-08 |
| <i>SCT2</i>        | Putative glycerol-3-phosphate acyltransferase                                         | -1.47 | 3.90E-09 |
| <i>BFR1</i>        | Protein involved in the maintenance of normal ploidy;                                 | -1.47 | 2.38E-08 |
| <i>UGP1</i>        | UTP-glucose-1-phosphaturidyl transferase                                              | -1.47 | 8.94E-06 |
| <i>YKE2</i>        | Possible heterohexameric Gim/prefoldin protein complex subunit                        | -1.49 | 9.55E-06 |
| <i>PTP3</i>        | Putative protein tyrosine phosphatase                                                 | -1.49 | 3.43E-11 |
| <i>LIG4</i>        | DNA ligase                                                                            | -1.50 | 4.13E-12 |
| <i>C1_14170W_A</i> | Ortholog(s) have ubiquitin-protein transferase activity                               | -1.50 | 6.89E-12 |
| <i>MON2</i>        | Peripheral membrane protein                                                           | -1.51 | 2.04E-08 |
| <i>PMM1</i>        | Phosphomannomutase                                                                    | -1.52 | 2.38E-08 |
| <i>BMT3</i>        | Beta-mannosyltransferase                                                              | -1.52 | 2.48E-09 |
| <i>CDC3</i>        | Septin                                                                                | -1.53 | 4.15E-12 |
| <i>C2_09480W_A</i> | Ortholog(s) have DNA-directed DNA polymerase activity                                 | -1.54 | 1.25E-10 |
| <i>C6_02650C_A</i> | Predicted membrane transporter                                                        | -1.55 | 7.14E-09 |
| <i>C6_01950C_A</i> | Protein of unknown function                                                           | -1.56 | 4.60E-07 |
| <i>PHM7</i>        | Putative transporter                                                                  | -1.56 | 6.42E-06 |
| <i>C1_13500C_A</i> | H/ACA box small nucleolar RNA (snoRNA)                                                | -1.57 | 1.40E-06 |
| <i>C2_00230W_A</i> | Ortholog(s) have arginyltransferase activity                                          | -1.57 | 1.57E-12 |
| <i>PMT2</i>        | Protein mannosyltransferase (PMT) with roles in hyphal growth and drug sensitivity    | -1.57 | 1.32E-08 |
| <i>GTT11</i>       | Glutathione S-transferase                                                             | -1.58 | 3.08E-10 |
| <i>CR_02300C_A</i> | Protein with a Vps9 vacuolar protein sorting protein domain                           | -1.58 | 5.19E-15 |
| <i>C3_03370C_A</i> | Protein of unknown function                                                           | -1.58 | 6.19E-09 |
| <i>C5_04470C_A</i> | Predicted RNA binding protein                                                         | -1.58 | 9.03E-06 |
| <i>NCP1</i>        | NADPH-cytochrome P450 reductase                                                       | -1.59 | 3.71E-14 |
| <i>BTS1</i>        | Putative geranylgeranyl diphosphate synthase                                          | -1.60 | 4.11E-13 |
| <i>REV3</i>        | Ortholog(s) have DNA-directed DNA polymerase activity                                 | -1.60 | 2.61E-09 |
| <i>EXG2</i>        | GPI-anchored cell wall protein                                                        | -1.61 | 9.76E-08 |
| <i>C7_02850W_A</i> | Ortholog of <i>Candida albicans</i> WO-1 : CAWG_05627                                 | -1.63 | 9.53E-11 |
| <i>SET3</i>        | NAD-dependent histone deacetylase                                                     | -1.64 | 8.22E-14 |
| <i>CLN3</i>        | G1 cyclin                                                                             | -1.65 | 2.02E-06 |
| <i>CYB5</i>        | Cytochrome b(5)                                                                       | -1.66 | 6.50E-07 |
| <i>C1_11120C_A</i> | Protein similar to <i>S. cerevisiae</i> Gvp36p                                        | -1.67 | 2.26E-18 |
| <i>PMI1</i>        | Phosphomannose isomerase                                                              | -1.67 | 6.30E-06 |
| <i>SVF1</i>        | Putative survival factor                                                              | -1.68 | 2.68E-13 |

|                    |                                                                              |       |          |
|--------------------|------------------------------------------------------------------------------|-------|----------|
| <i>C5_04350C_A</i> | Ortholog(s) have cell division site, cell tip, cytosol, nucleus localization | -1.68 | 3.51E-14 |
| <i>PMT4</i>        | Protein mannosyltransferase                                                  | -1.69 | 5.51E-06 |
| <i>SEC23</i>       | Putative GTPase-activating protein                                           | -1.69 | 3.05E-07 |
| <i>C1_02780W_A</i> | Predicted dienelactone hydrolase domain                                      | -1.69 | 9.75E-08 |
| <i>FAS2</i>        | Alpha subunit of fatty-acid synthase                                         | -1.69 | 1.66E-07 |
| <i>RDI1</i>        | Putative rho GDP dissociation inhibitor                                      | -1.72 | 3.90E-06 |
| <i>C4_06990W_A</i> | Possible mannosyltransferase                                                 | -1.73 | 1.58E-16 |
| <i>TPK2</i>        | cAMP-dependent protein kinase catalytic subunit                              | -1.75 | 8.64E-09 |
| <i>C2_08620W_A</i> | Protein of unknown function                                                  | -1.76 | 3.24E-10 |
| <i>C3_04740C_A</i> | Ortholog(s) have DNA topoisomerase type I activity                           | -1.76 | 2.64E-07 |
| <i>CR_09010C_A</i> | Putative cystathionine gamma-synthase                                        | -1.77 | 8.86E-07 |
| <i>CR_04870C_A</i> | Trimethylaminobutyraldehyde dehydrogenase                                    | -1.77 | 5.45E-06 |
| <i>AGO1</i>        | Putative Argonaute protein involved in RNA silencing                         | -1.78 | 6.15E-06 |
| <i>ECM33</i>       | GPI-anchored cell wall protein                                               | -1.78 | 1.15E-10 |
| <i>CDC12</i>       | Septin                                                                       | -1.78 | 1.40E-11 |
| <i>CR_09330C_A</i> | Protein with a Staphylococcal nuclease domain                                | -1.80 | 3.71E-10 |
| <i>C5_02520W_A</i> | Protein of unknown function                                                  | -1.81 | 5.89E-11 |
| <i>ENO1</i>        | Enolase                                                                      | -1.81 | 1.73E-06 |
| <i>SEC61</i>       | ER protein-translocation complex subunit                                     | -1.81 | 2.61E-06 |
| <i>CR_00290W_A</i> | Ortholog of <i>S. cerevisiae</i> Rts3                                        | -1.82 | 4.72E-14 |
| <i>C2_02220C_A</i> | Protein of unknown function                                                  | -1.82 | 2.61E-06 |
| <i>ERG2</i>        | C-8 sterol isomerase                                                         | -1.82 | 1.14E-08 |
| <i>C1_09130W_A</i> | Protein of unknown function                                                  | -1.82 | 7.74E-09 |
| <i>STE13</i>       | Putative pheromone-processing dipeptidyl aminopeptidase                      | -1.84 | 1.24E-14 |
| <i>PSD2</i>        | Ortholog(s) have phosphatidylserine decarboxylase activity                   | -1.84 | 7.61E-20 |
| <i>NIP100</i>      | p150 subunit of dynactin                                                     | -1.85 | 2.42E-08 |
| <i>ACB1</i>        | Protein similar to a region of acyl-coenzyme-A-binding protein               | -1.89 | 2.24E-06 |
| <i>DPM1</i>        | Dolichol-phosphate mannose synthase catalytic subunit                        | -1.90 | 1.58E-10 |
| <i>YVC1</i>        | Putative vacuolar cation channel shock                                       | -1.90 | 7.81E-12 |
| <i>FBA1</i>        | Fructose-bisphosphate aldolase                                               | -1.91 | 5.04E-11 |
| <i>C1_11250W_A</i> | Microtubule-binding protein of the cortical microtubule                      | -1.91 | 5.84E-16 |
| <i>C3_06860C_A</i> | Putative xylose and arabinose reductase                                      | -1.91 | 3.56E-06 |
| <i>ERG3</i>        | C-5 sterol desaturase                                                        | -1.94 | 5.82E-06 |
| <i>C4_05250W_A</i> | Putative ubiquitin-protein ligase                                            | -1.94 | 2.43E-10 |
| <i>INN1</i>        | Protein with similarity to <i>S. cerevisiae</i> Inn1p                        | -1.94 | 2.19E-27 |
| <i>C5_02850W_A</i> | H/ACA box small nucleolar RNA (snoRNA)                                       | -1.95 | 5.87E-08 |
| <i>MTS1</i>        | Sphingolipid C9-methyltransferase                                            | -1.95 | 5.19E-13 |
| <i>C5_01070C_A</i> | Protein of unknown function                                                  | -1.96 | 8.72E-06 |
| <i>C2_09810C_A</i> | Protein with predicted peptidase domains                                     | -1.96 | 8.75E-06 |
| <i>FAV2</i>        | Adhesin-like protein                                                         | -1.99 | 1.12E-06 |
| <i>NAT4</i>        | Putative histone acetyltransferase                                           | -2.00 | 1.49E-11 |
| <i>C3_04420W_A</i> | Ortholog of <i>S. cerevisiae</i> Hul4                                        | -2.01 | 5.36E-10 |
| <i>SSO2</i>        | Plasma membrane t-SNARE                                                      | -2.02 | 2.14E-31 |
| <i>C5_03490C_A</i> | Stationary phase enriched protein                                            | -2.03 | 1.75E-20 |
| <i>CDC19</i>       | Pyruvate kinase at yeast cell surface                                        | -2.05 | 1.11E-09 |
| <i>TPM2</i>        | Putative tropomyosin isoform 2                                               | -2.08 | 1.57E-10 |
| <i>CR_09070C_A</i> | Protein of unknown function                                                  | -2.09 | 1.64E-12 |



|                    |                                                                        |       |          |
|--------------------|------------------------------------------------------------------------|-------|----------|
| <i>ERG9</i>        | Putative farnesyl-diphosphate farnesyl transferase (squalene synthase) | -2.11 | 3.41E-06 |
| <i>ERG251</i>      | C-4 sterol methyl oxidase                                              | -2.11 | 2.28E-06 |
| <i>SLD1</i>        | Sphingolipid delta-8 desaturase                                        | -2.12 | 1.74E-16 |
| <i>CR_04120C_A</i> | Ortholog(s) have DNA-dependent ATPase activity                         | -2.13 | 7.35E-12 |
| <i>C1_11790W_A</i> | Ortholog(s) have thymidylate kinase activity                           | -2.16 | 1.62E-13 |
| <i>GAL4</i>        | Zn(II)2Cys6 transcription factor                                       | -2.17 | 9.77E-12 |
| <i>C1_11730W_A</i> | Protein with SEL-1 like protein domain                                 | -2.18 | 4.07E-19 |
| <i>ERG27</i>       | 3-Keto sterol reductase                                                | -2.18 | 1.46E-11 |
| <i>DAP1</i>        | Similar to mammalian membrane-associated progesterone receptors        | -2.18 | 5.65E-23 |
| <i>ERG11</i>       | Lanosterol 14-alpha-demethylase                                        | -2.20 | 1.79E-08 |
| <i>MSC7</i>        | <i>S. cerevisiae</i> ortholog Mcs7                                     | -2.20 | 1.08E-50 |
| <i>PST3</i>        | Flavodoxin-like protein                                                | -2.20 | 1.59E-07 |
| <i>CRL1</i>        | Predicted GTPase of RHO family                                         | -2.20 | 2.57E-25 |
| <i>C7_01390W_A</i> | Protein of unknown function                                            | -2.20 | 1.18E-07 |
| <i>C2_07220W_A</i> | Putative 20S proteasome assembly protein                               | -2.21 | 3.12E-12 |
| <i>CEK1</i>        | ERK-family protein kinase                                              | -2.22 | 8.30E-16 |
| <i>C1_04470C_A</i> | Protein of unknown function                                            | -2.23 | 7.36E-13 |
| <i>C4_01860C_A</i> | Possible Golgi membrane protein                                        | -2.23 | 5.01E-09 |
| <i>C1_09980C_A</i> | Ortholog(s) have acylglycerol lipase activity                          | -2.25 | 2.20E-08 |
| <i>MNN12</i>       | Predicted alpha-1,3-mannosyltransferase activity                       | -2.25 | 1.85E-09 |
| <i>C1_11720W_A</i> | Ortholog of <i>Candida albicans</i> WO-1 : CAWG_00265                  | -2.26 | 4.14E-08 |
| <i>LAP41</i>       | Putative aminopeptidase yscI precursor                                 | -2.28 | 1.34E-10 |
| <i>CHS8</i>        | Chitin synthase required for synthesis of long-chitin fibrils          | -2.28 | 7.44E-17 |
| <i>MLC1</i>        | Microtubule-dependent localized protein                                | -2.29 | 7.04E-18 |
| <i>GND1</i>        | 6-phosphogluconate dehydrogenase                                       | -2.31 | 5.32E-07 |
| <i>PGA54</i>       | GPI-anchored protein                                                   | -2.31 | 1.27E-09 |
| <i>C1_04580C_A</i> | Ortholog of Rmd6 involved in <i>S. cerevisiae</i> sporulation          | -2.33 | 1.30E-17 |
| <i>CR_09040W_A</i> | Protein of unknown function                                            | -2.35 | 4.48E-09 |
| <i>ZWF1</i>        | Glucose-6-phosphate dehydrogenase                                      | -2.36 | 2.54E-08 |
| <i>ECM331</i>      | GPI-anchored protein                                                   | -2.40 | 6.90E-08 |
| <i>C4_00860C_A</i> | Protein of unknown function                                            | -2.41 | 2.85E-11 |
| <i>CR_04770C_A</i> | Ortholog of <i>C. dubliniensis</i> CD36 : Cd36_30140                   | -2.41 | 6.35E-18 |
| <i>ERG5</i>        | Putative C-22 sterol desaturase                                        | -2.46 | 5.02E-12 |
| <i>GFA1</i>        | Glucosamine-6-phosphate synthase                                       | -2.50 | 7.47E-16 |
| <i>ERG10</i>       | Acetyl-CoA acetyltransferase                                           | -2.52 | 1.16E-11 |
| <i>BMT7</i>        | Beta-mannosyltransferase                                               | -2.53 | 2.18E-09 |
| <i>ERG26</i>       | C-3 sterol dehydrogenase                                               | -2.56 | 4.64E-18 |
| <i>UPC2</i>        | Zn2-Cys6 transcript factor                                             | -2.57 | 1.42E-41 |
| <i>C1_13490C_A</i> | Ortholog(s) have role in cellular calcium ion homeostasis              | -2.59 | 9.62E-29 |
| <i>C1_11260C_A</i> | Putative adhesin-like protein                                          | -2.63 | 3.80E-14 |
| <i>CHS2</i>        | Chitin synthase                                                        | -2.64 | 2.54E-47 |
| <i>ERG1</i>        | Squalene epoxidase                                                     | -2.67 | 1.36E-30 |
| <i>PGA6</i>        | GPI-anchored cell wall adhesin-like protein                            | -2.73 | 9.82E-09 |
| <i>PGA31</i>       | Cell wall protein                                                      | -2.75 | 9.31E-06 |
| <i>C7_02280W_A</i> | Ortholog of <i>C. parapsilosis</i> CDC317 : CPAR2_808370               | -2.76 | 7.50E-07 |
| <i>CHO1</i>        | Putative phosphatidylserine synthase                                   | -2.78 | 3.25E-15 |
| <i>C6_03260W_A</i> | Putative ribonuclease H1                                               | -2.82 | 1.15E-17 |

|                    |                                                               |       |          |
|--------------------|---------------------------------------------------------------|-------|----------|
| <i>ERG24</i>       | C-14 sterol reductase                                         | -2.92 | 5.37E-24 |
| <i>ERG4</i>        | Protein similar to sterol C-24 reductase                      | -3.12 | 1.38E-11 |
| <i>IPK2</i>        | Putative inositol polyphosphate multikinase                   | -3.17 | 1.60E-33 |
| <i>C2_02910W_A</i> | Protein of unknown function                                   | -3.18 | 5.17E-13 |
| <i>C7_02260W_A</i> | Ortholog of <i>C. parapsilosis</i> CDC317: CPAR2_808350       | -3.18 | 4.33E-08 |
| <i>RBT4</i>        | Pry family protein                                            | -3.24 | 2.14E-12 |
| <i>DAG7</i>        | Secretory protein;                                            | -3.26 | 4.72E-10 |
| <i>LDG3</i>        | Putative LDG family protein                                   | -3.30 | 9.04E-08 |
| <i>C7_03310W_A</i> | Protein of unknown function                                   | -3.33 | 5.67E-09 |
| <i>C6_02100W_A</i> | Secreted poetin                                               | -3.39 | 1.10E-09 |
| <i>C3_06660C_A</i> | Ortholog of <i>C. dubliniensis</i> CD36: Cd36_86630           | -3.50 | 1.92E-07 |
| <i>HWP1</i>        | Hyphal cell wall protein                                      | -3.62 | 8.94E-08 |
| <i>C1_04590W_A</i> | Protein of unknown function                                   | -3.65 | 3.47E-27 |
| <i>DDR48</i>       | Immunogenic stress-associated protein                         | -3.78 | 2.14E-14 |
| <i>PGA45</i>       | Putative GPI-anchored cell wall protein                       | -3.82 | 2.94E-11 |
| <i>ERG6</i>        | Delta (24)-sterol C-methyltransferase                         | -3.82 | 3.15E-27 |
| <i>RBR1</i>        | Glycosylphosphatidylinositol (GPI)-anchored cell wall protein | -3.85 | 6.87E-14 |
| <i>C2_10160W_A</i> | Secreted protein                                              | -3.92 | 2.18E-22 |
| <i>CRH11</i>       | GPI-anchored cell wall transglycosylase                       | -4.33 | 2.12E-26 |
| <i>PGA23</i>       | Putative GPI-anchored protein of unknown function             | -4.67 | 9.84E-25 |
| <i>MRV8</i>        | Protein of unknown function                                   | -4.82 | 9.56E-18 |
| <i>PGA13</i>       | GPI-anchored cell wall protein                                | -5.42 | 6.17E-38 |
| <i>C3_01540W_A</i> | Plasma-membrane-localized protein                             | -6.41 | 4.64E-40 |

**Supplementary Table S7: Gene expression data;** Significantly upregulated/downregulated genes in *C. albicans* treated with C12AHL+fluconazole compared to fluconazole only treated samples. The genes that are known to be associated with antimicrobial sensitivity/resistance are shaded in light blue (adjusted *p-value* < 1e<sup>-5</sup>).

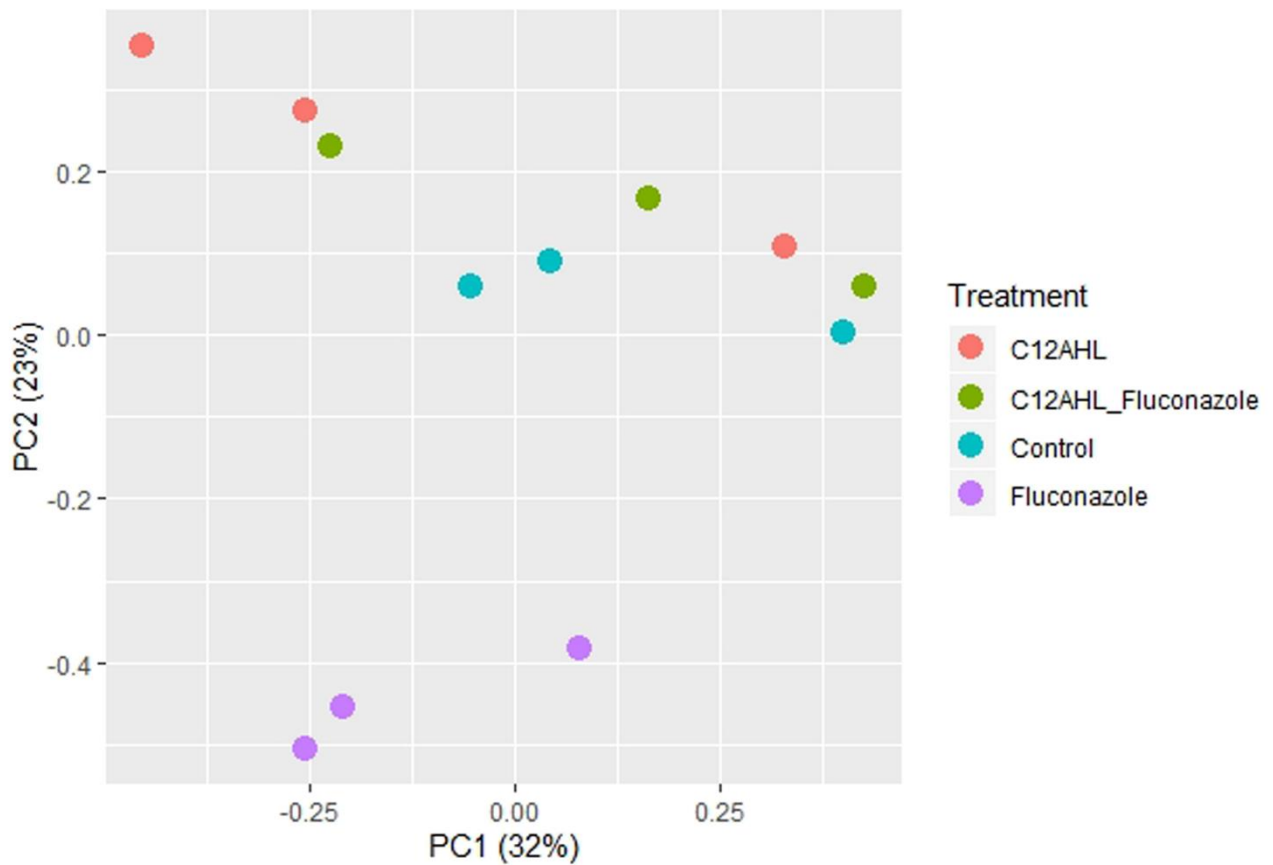

**Supplementary Figure S8: Principle component analysis of *C. albicans* gene expression.** The gene expression profiles for the control, C12AHL, C12AHL+fluconazole, and fluconazole only treatments were statistically compared using a principle component analysis to identify variability in gene expression between treatments. Each colour represents a different treatment as indicated in the right-side panel, and each circle represents the gene expression for one of the replicates per treatment.



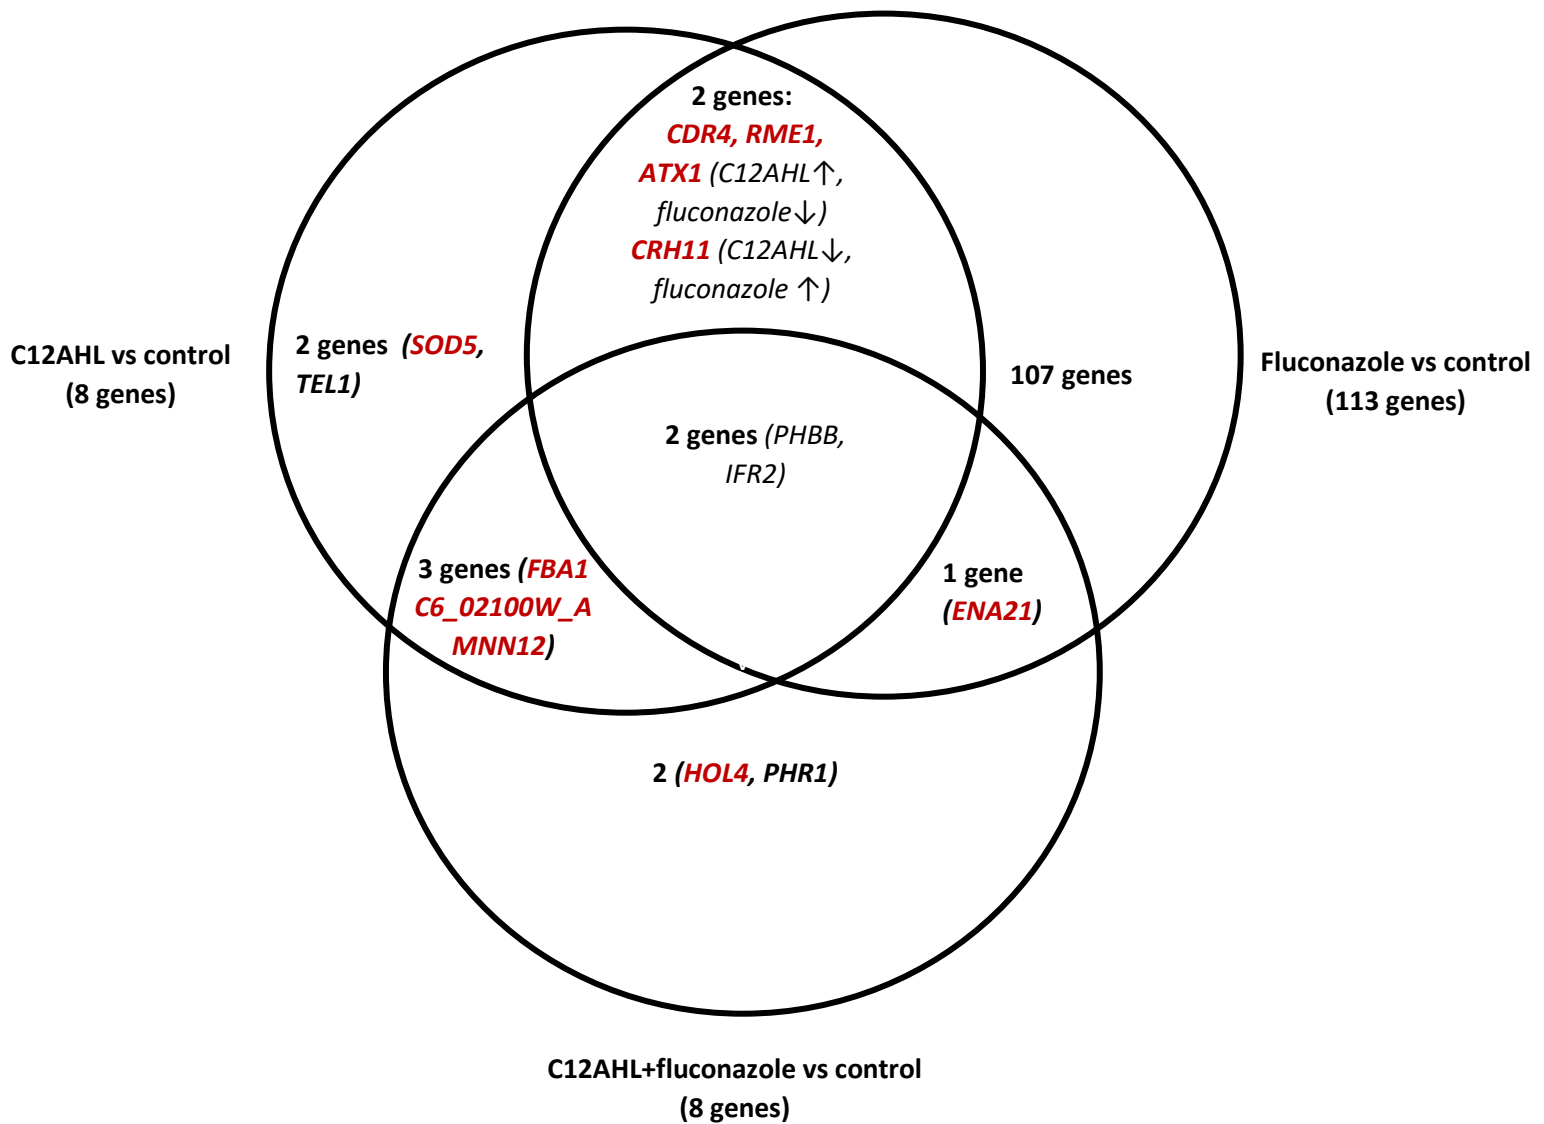

Supplementary Figure S9: Comparisons among significantly downregulated genes in *C. albicans* exposed to fluconazole, C12AHL or C12AHL+fluconazole. Genes that are highlighted in red are known to be associated with antifungal resistance (adjusted p-value < 1e<sup>-5</sup>). Genes that were significantly downregulated between treatments are shown in Supplementary Tables 2-6.

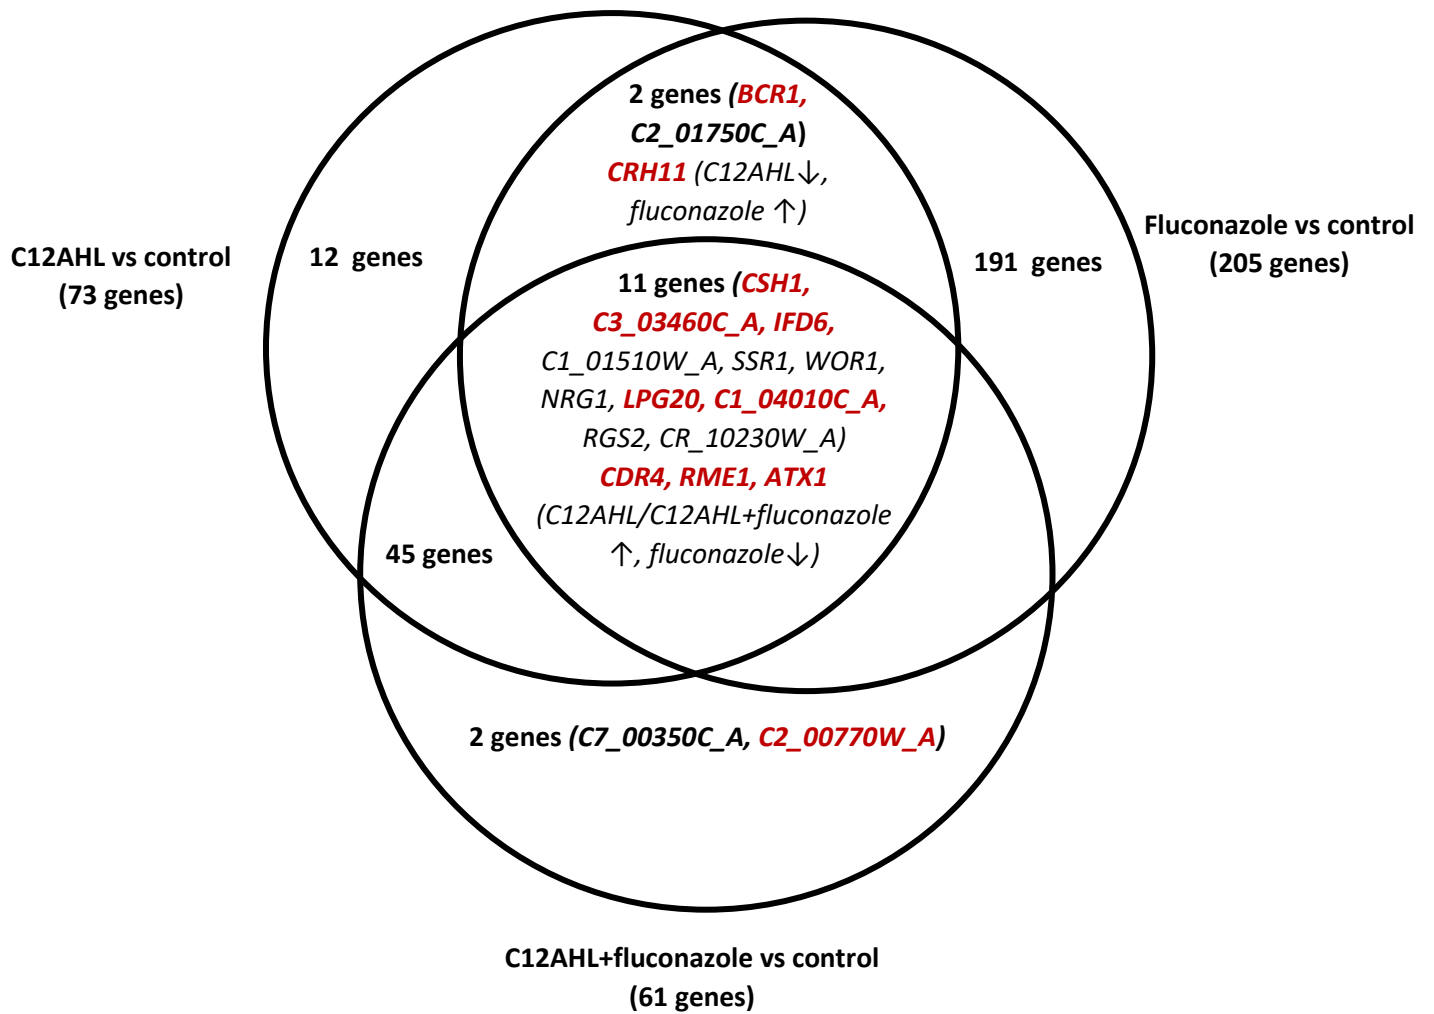

**Supplementary Figure S10: Comparisons among significantly upregulated genes in *C. albicans* exposed to fluconazole, C12AHL or C12AHL+fluconazole.** Genes that are highlighted in red are known to be associated with antifungal resistance (adjusted p-value < 1e<sup>-5</sup>). Genes that were significantly upregulated between treatments are shown in Supplementary Tables 2-6.

| <b>Biological function</b>        | <b>Protein (accession No.)</b>          | <b>Protein family</b>                                         | <b>Gene</b>                   | <b>Notes</b>                                                   | <b>Reference</b> |
|-----------------------------------|-----------------------------------------|---------------------------------------------------------------|-------------------------------|----------------------------------------------------------------|------------------|
| Antifungal resistance             | Gcy1p (gi 68472117)                     | Glycerol 2-dehydrogenase (NADP(+))                            | <i>GCY1</i>                   | mutation confers hypersensitivity to toxic ergosterol analogue | 1,2              |
| Respiration                       | Lsc1p (gi 68475125)***                  | Succinate-CoA ligase (putative)                               | <i>LSC1</i>                   | Induced by fluconazole                                         | 3                |
|                                   | Cox4p (gi 68466651)                     | Cytochrome c oxidase subunit IV                               | <i>COX4</i>                   |                                                                | 4,5              |
|                                   | Lpd1p (gi 68487498)***                  | Dihydrolipoyl dehydrogenase (putative)                        | <i>LPD1</i>                   |                                                                | 6                |
|                                   | Pda1p (gi 68481122)***                  | Pyruvate dehydrogenase (acetyl-transferring) subunit E1 alpha | <i>PDA1</i>                   | Induced by fluconazole                                         | 3,6              |
| Oxidative stress                  | Atp1p (gi 238879075)                    | ATP synthase alpha unit                                       | <i>ATP1</i>                   | Induced by ciclopirox, ketoconazole, flucytosine               | 7                |
|                                   | Sod1p (gi 6094316)                      | Superoxide dismutase                                          | <i>SOD1</i>                   |                                                                | 8                |
|                                   | Cyp5p (gi 68479834)                     | Peptidyl-prolyl cis-trans isomerase                           | <i>CYP5</i>                   |                                                                | 9                |
|                                   | Pst1p (gi 68491679)                     | NAD(P)H dehydrogenase (flavodoxin-like protein)               | <i>PST3</i>                   |                                                                | 10,11            |
| Apoptosis                         | Mxr1p (gi 68472567)***                  | Peptide-methionine -S-oxide reductase (putative)              | <i>MXR1</i>                   | Induced by flucytosine                                         | 7                |
|                                   | Cpr3p (gi 68466799)                     | Peptidyl-prolyl cis-trans isomerase (putative)                | <i>CPR3</i>                   |                                                                | 12               |
| Peptide synthesis/Protein folding | Cr_04650wp_a (gi 23887992)              | Protein involved in microtubule morphogenesis                 | <i>CR_04650W_A (RBL2)</i>     |                                                                | 13               |
|                                   | Mmd1p (Hmf1p)** (gi 238878875)          | Deaminase                                                     | <i>MMD1 (HMF1)**</i>          |                                                                | 9,13             |
| Nucleic acid synthesis            | Dut1p (gi 68475057)***                  | Bifunctional dITP/dUTP diphosphatase                          | <i>DUT1</i>                   |                                                                | 14               |
|                                   | Hnt1p (gi 68484224)***                  | Adenosine 5'-monophosphoramidase                              | <i>HNT1</i>                   |                                                                | 6                |
| Cellular metabolism               | Ach1p (gi 68482646)***                  |                                                               | <i>ACH1</i>                   | Induced by ketoconazole                                        | 7                |
| Unknown                           | Hypothetical (gi 68487695) <sup>x</sup> | Unknown                                                       | <i>CaO19.9673<sup>x</sup></i> |                                                                |                  |

\*Nomenclature conflict, \*\* Orthologs, \*\*\* Obsolete record in NCBI, thus matched for an identical protein, <sup>x</sup> Obsolete record in NCBI

**Supplementary Table S11: Protein expression data;** Under-expressed proteins in C12AHL+fluconazole treated *C. albicans* samples compared to fluconazole only treated samples

- 1 Askew, C. *et al.* Transcriptional regulation of carbohydrate metabolism in the human pathogen *Candida albicans*. *PLoS Pathog* **5**, e1000612, doi:10.1371/journal.ppat.1000612 (2009).
- 2 Xu, D. *et al.* Genome-wide fitness test and mechanism-of-action studies of inhibitory compounds in *Candida albicans*. *PLoS Pathog* **3**, e92, doi:10.1371/journal.ppat.0030092 (2007).
- 3 Copping, V. M. *et al.* Exposure of *Candida albicans* to antifungal agents affects expression of *SAP2* and *SAP9* secreted proteinase genes. *J Antimicrob Chemother* **55**, 645-654, doi:10.1093/jac/dki088 (2005).

- 4 Cabezon, V., Llama-Palacios, A., Nombela, C., Monteoliva, L. & Gil, C. Analysis of *Candida albicans* plasma membrane proteome. *Proteomics* **9**, 4770-4786, doi:10.1002/pmic.200800988 (2009).
- 5 Mitrovich, Q. M., Tuch, B. B., Guthrie, C. & Johnson, A. D. Computational and experimental approaches double the number of known introns in the pathogenic yeast *Candida albicans*. *Genome Res* **17**, 492-502, doi:10.1101/gr.6111907 (2007).
- 6 Kusch, H. *et al.* A proteomic view of *Candida albicans* yeast cell metabolism in exponential and stationary growth phases. *Int J Med Microbiol* **298**, 291-318, doi:10.1016/j.ijmm.2007.03.020 (2008).
- 7 Liu, T. T. *et al.* Genome-wide expression profiling of the response to azole, polyene, echinocandin, and pyrimidine antifungal agents in *Candida albicans*. *Antimicrob Agents Chemother* **49**, 2226-2236, doi:10.1128/AAC.49.6.2226-2236.2005 (2005).
- 8 Hwang, C. S. *et al.* Copper- and zinc-containing superoxide dismutase and its gene from *Candida albicans*. *Biochim Biophys Acta* **1427**, 245-255 (1999).
- 9 Fernandez-Arenas, E. *et al.* Integrated proteomics and genomics strategies bring new insight into *Candida albicans* response upon macrophage interaction. *Mol Cell Proteomics* **6**, 460-478, doi:10.1074/mcp.M600210-MCP200 (2007).
- 10 Li, L., Naseem, S., Sharma, S. & Konopka, J. B. Flavodoxin-Like Proteins Protect *Candida albicans* from Oxidative Stress and Promote Virulence. *PLoS Pathog* **11**, e1005147, doi:10.1371/journal.ppat.1005147 (2015).
- 11 Cowen, L. E. *et al.* Population genomics of drug resistance in *Candida albicans*. *Proc Natl Acad Sci U S A* **99**, 9284-9289, doi:10.1073/pnas.102291099 (2002).
- 12 Hirakawa, M. P. *et al.* Genetic and phenotypic intra-species variation in *Candida albicans*. *Genome Res* **25**, 413-425, doi:10.1101/gr.174623.114 (2015).
- 13 Nobile, C. J. *et al.* A recently evolved transcriptional network controls biofilm development in *Candida albicans*. *Cell* **148**, 126-138, doi:10.1016/j.cell.2011.10.048 (2012).
- 14 McIntosh, E. M., Looser, J., Haynes, R. H. & Pearlman, R. E. Mlul site-dependent transcriptional regulation of the *Candida albicans* dUTPase gene. *Curr Genet* **26**, 415-421 (1994).

| <b>Biological function</b>        | <b>Protein (Accession No.)</b> | <b>Protein family</b>                                             | <b>Gene</b>            | <b>Notes</b>                                                                                        | <b>Reference</b> |
|-----------------------------------|--------------------------------|-------------------------------------------------------------------|------------------------|-----------------------------------------------------------------------------------------------------|------------------|
| Respiration                       | Gpm1p (gi 68469783)***         | Phosphoglycerate mutase                                           | <i>GPM1</i>            | Induced by fluconazole                                                                              | 1                |
|                                   | Cit1p (gi 238879810)           | ATP citrate synthase                                              | <i>CIT1</i>            |                                                                                                     | 2                |
|                                   | Pck1p (gi 68474596)            | Phosphoenolpyruvate carboxykinase (ATP)                           | <i>PCK1</i>            | Induced by fluconazole                                                                              | 1                |
| Oxidative stress                  | Hsp21p (gi 68469633)***        | Unknown                                                           | <i>HSP21</i>           | Downregulated by fluconazole                                                                        | 1,3              |
| Apoptosis                         | Tdh3p (gi 68472227)            | Glyceraldehyde-3-phosphate dehydrogenase (NAD+) (phosphorylating) | <i>TDH3/TDH1/GAP1*</i> |                                                                                                     | 4                |
| Peptide synthesis/Protein folding | Lap3p (gi 68477033)***         | Aminopeptidase (bleomycin hydrolase)                              | <i>LAP3</i>            |                                                                                                     | 2                |
| Fermentation                      | Adh4p (gi 68471589)***         | Predicated 3-hydroxyacyl-CoA dehydrogenase                        | <i>ADH4</i>            | upregulated in azole-resistant strain overexpressing <i>MDR1/</i> in fluconazole resistance strains | 5,6              |

\*Nomenclature conflict, \*\* Orthologs, \*\*\* Obsolete record in NCBI, thus matched for an identical protein, \* Obsolete record in NCBI

**Supplementary Table S12: Protein expression data:** Overexpressed proteins when treated with C12AHL+fluconazole + *C. albicans* compared to fluconazole only treated samples

- 1 Copping, V. M. *et al.* Exposure of *Candida albicans* to antifungal agents affects expression of *SAP2* and *SAP9* secreted proteinase genes. *J Antimicrob Chemother* **55**, 645-654, doi:10.1093/jac/dki088 (2005).
- 2 Lan, C. Y. *et al.* Regulatory networks affected by iron availability in *Candida albicans*. *Mol Microbiol* **53**, 1451-1469, doi:10.1111/j.1365-2958.2004.04214.x (2004).
- 3 Mayer, F. L. *et al.* Small but crucial: the novel small heat shock protein Hsp21 mediates stress adaptation and virulence in *Candida albicans*. *PLoS One* **7**, e38584, doi:10.1371/journal.pone.0038584 (2012).
- 4 Delgado, M. L., Gil, M. L. & Gozalbo, D. Starvation and temperature upshift cause an increase in the enzymatically active cell wall-associated glyceraldehyde-3-phosphate dehydrogenase protein in yeast. *FEMS Yeast Res* **4**, 297-303, doi:10.1016/S1567-1356(03)00159-4 (2003).
- 5 Karababa, M., Coste, A. T., Rognon, B., Bille, J. & Sanglard, D. Comparison of gene expression profiles of *Candida albicans* azole-resistant clinical isolates and laboratory strains exposed to drugs inducing multidrug transporters. *Antimicrob Agents Chemother* **48**, 3064-3079, doi:10.1128/AAC.48.8.3064-3079.2004 (2004).
- 6 Cowen, L. E. *et al.* Population genomics of drug resistance in *Candida albicans*. *Proc Natl Acad Sci U S A* **99**, 9284-9289, doi:10.1073/pnas.102291099 (2002).

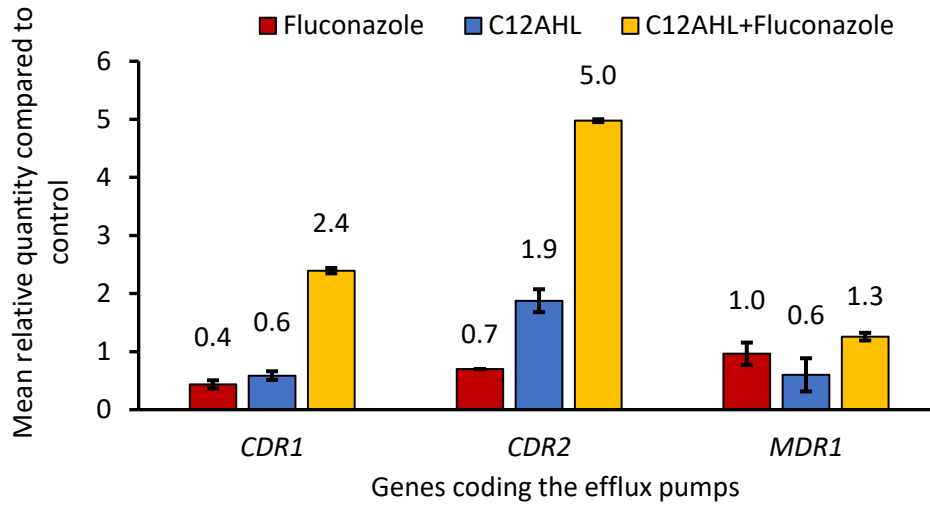

**Supplementary Figure S13: Differential expression of *CDR1*, *CDR2* and *MDR1* to C12AHL, fluconazole or their combination.** Real-time quantitative PCR assay data. Note the significant upregulation of *C. albicans CDR1* and *CDR2* when exposed to C12AHL+fluconazole and *CDR2* when exposed to C12AHL compared to solvent controls ( $P < 0.05$ ).

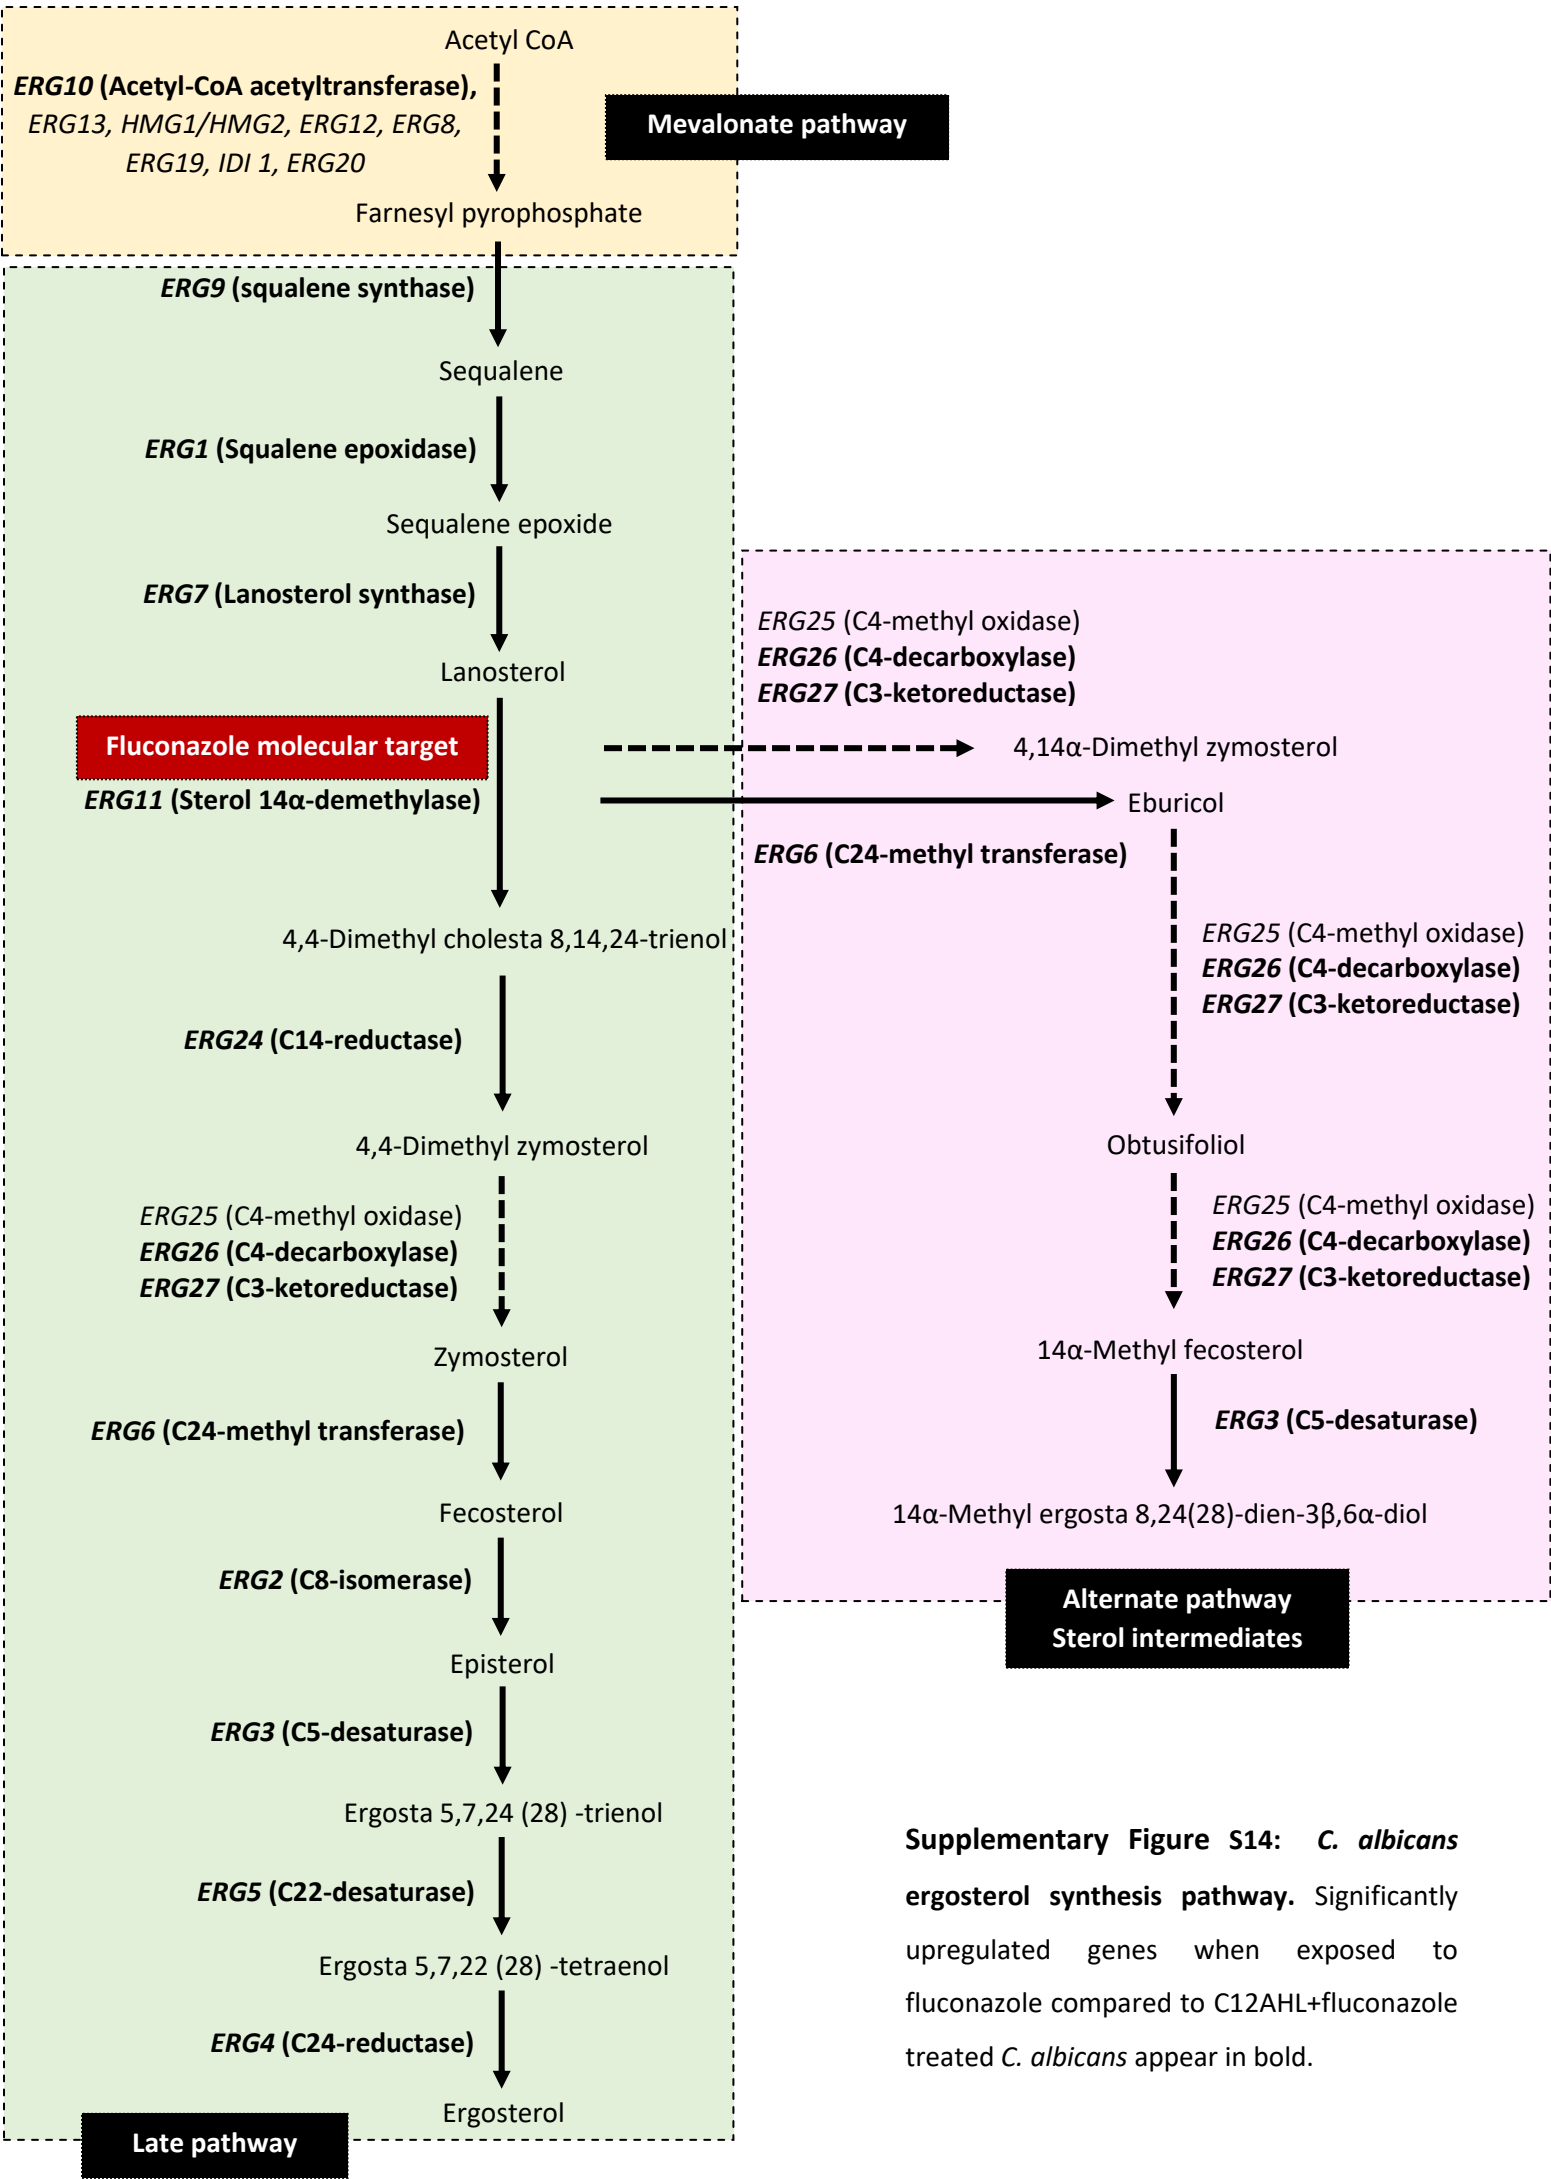

**Supplementary Figure S14: *C. albicans* ergosterol synthesis pathway.** Significantly upregulated genes when exposed to fluconazole compared to C12AHL+fluconazole treated *C. albicans* appear in bold.



| <i>C. albicans</i>                                      | Strain name | Genotype                                                                                                                     | Reference |
|---------------------------------------------------------|-------------|------------------------------------------------------------------------------------------------------------------------------|-----------|
| <b>Wild type</b>                                        | CAF2-1      | $\Delta ura3::imm434/URA3$                                                                                                   | 1         |
| <b><math>\Delta cdr1</math></b>                         | DSY448      | $\Delta cdr1::hisG-URA3-hisG/\Delta cdr1::hisG$                                                                              | 1         |
| <b><math>\Delta mdr1</math></b>                         | DSY465      | $\Delta mdr1::hisG-URA3-hisG/\Delta mdr1::hisG$                                                                              | 1,2       |
| <b><math>\Delta cdr1 \Delta cdr2</math></b>             | DSY654      | $\Delta cdr1::hisG/\Delta cdr1::hisG$<br>$\Delta cdr2::hisG-URA3-hisG/\Delta cdr2::hisG$                                     | 3         |
| <b><math>\Delta cdr1 \Delta cdr2 \Delta mdr1</math></b> | DSY1050     | $\Delta cdr1::hisG/\Delta cdr1::hisG \Delta cdr2::hisG/\Delta cdr2::hisG$<br>$\Delta mdr1::hisG-URA3-hisG/\Delta mdr1::hisG$ | 2         |
| <b><math>\Delta erg3</math></b>                         | DSY1751     | $erg3A\Delta::hisG/erg3B\Delta::hisG-URA3-hisG$<br>$erg11\Delta::hisG/ERG11$                                                 | 4         |
| <b><math>\Delta erg11 \Delta erg3</math></b>            | DSY1764     | $erg3A\Delta::hisG/erg3B\Delta::hisG$<br>$erg11\Delta::hisG/erg11\Delta::hisG-URA3-hisG$                                     | 4         |
| <b><math>\Delta erg11</math></b>                        | DSY1769     | $erg11\Delta::hisG-URA3-hisG erg11\Delta::hisG-URA3-hisG$                                                                    | 4         |

**Supplementary Table S15:** *Candida albicans* strains used in this study

- 1 Sanglard, D., Ischer, F., Monod, M. & Bille, J. Susceptibilities of *Candida albicans* multidrug transporter mutants to various antifungal agents and other metabolic inhibitors. *Antimicrob Agents Chemother* **40**, 2300-2305 (1996).
- 2 Mukherjee, P. K., Chandra, J., Kuhn, D. M. & Ghannoum, M. A. Mechanism of fluconazole resistance in *Candida albicans* biofilms: phase-specific role of efflux pumps and membrane sterols. *Infect Immun* **71**, 4333-4340 (2003).
- 3 Sanglard, D., Ischer, F., Monod, M. & Bille, J. Cloning of *Candida albicans* genes conferring resistance to azole antifungal agents: characterization of *CDR2*, a new multidrug ABC transporter gene. *Microbiology* **143 ( Pt 2)**, 405-416, doi:10.1099/00221287-143-2-405 (1997).
- 4 Sanglard, D., Ischer, F., Parkinson, T., Falconer, D. & Bille, J. *Candida albicans* mutations in the ergosterol biosynthetic pathway and resistance to several antifungal agents. *Antimicrob Agents Chemother* **47**, 2404-2412, doi:10.1128/aac.47.8.2404-2412.2003 (2003).

| <i>C. albicans</i> gene            | Primer  | Sequence (5'–3')           |
|------------------------------------|---------|----------------------------|
| <b><i>CDR1</i></b>                 | Forward | GCATATGGTGTTGCTAATGATTCTG  |
|                                    | Reverse | AAACCTTCTGTGGCTAATTTCAA    |
| <b><i>CDR2</i></b>                 | Forward | ACGGCAACATTAGTCATGAACAA    |
|                                    | Reverse | AGTTTTTCACCCAGTATTTGGCATT  |
| <b><i>MDR1</i></b>                 | Forward | GCTAGTGTTGCTGATGTGGTTAAATT |
|                                    | Reverse | CAAACAGCACCCAAACTCAA       |
| <b><i>EFB1</i> (House Keeping)</b> | Forward | TGTGAAAATCGGATCAATGCA      |
|                                    | Reverse | CATGGCCAATGCTCTTTCAA       |

**Supplementary Table S16:** The primers used for the Real-time quantitative PCR in this study
